# Supplementary material for: Protocol and statistical analysis plan for the PREventing cardiovascular collaPse with Administration of fluid REsuscitation during Induction and Intubation (PREPARE II) randomised clinical trial
Source: PubMed Central journal article supplement — BMJ Open. 2020 Sep 18;10(9):e036671. doi: 10.1136/bmjopen-2019-036671 (PMC7511643; doi:10.1136/bmjopen-2019-036671), 2020-09-18
Supplement: bmjopen-2019-036671.draft_revisions.pdf [file bmjopen-2019-036671.draft_revisions.pdf]

# BMJ Open

BMJ Open is committed to open peer review. As part of this commitment we make the peer review history of every article we publish publicly available.

When an article is published we post the peer reviewers' comments and the authors' responses online. We also post the versions of the paper that were used during peer review. These are the versions that the peer review comments apply to.

The versions of the paper that follow are the versions that were submitted during the peer review process. They are not the versions of record or the final published versions. They should not be cited or distributed as the published version of this manuscript.

BMJ Open is an open access journal and the full, final, typeset and author-corrected version of record of the manuscript is available on our site with no access controls, subscription charges or pay-per-view fees (<http://bmjopen.bmj.com>).

If you have any questions on BMJ Open's open peer review process please email [info.bmjopen@bmj.com](mailto:info.bmjopen@bmj.com)

# BMJ Open

## Protocol and statistical analysis plan for the PREventing cardiovascular collaPse with Administration of fluid REsuscitation during Induction and Intubation (PREPARE II) randomized clinical trial

|                               |                                                                                                                                                                                                                                                                                                                                                                                                                                                                                                                                                                                                                                                                                                                                                                                                                                                                                                                                                                                                                                                                                                                                                                                                                                                                                                                                                                                                                                                                                                                                                                                                                                                                                                                                                                                                                                                                                                                                                                                                                                                                                                                                                                                                                                                                                                                                               |
|-------------------------------|-----------------------------------------------------------------------------------------------------------------------------------------------------------------------------------------------------------------------------------------------------------------------------------------------------------------------------------------------------------------------------------------------------------------------------------------------------------------------------------------------------------------------------------------------------------------------------------------------------------------------------------------------------------------------------------------------------------------------------------------------------------------------------------------------------------------------------------------------------------------------------------------------------------------------------------------------------------------------------------------------------------------------------------------------------------------------------------------------------------------------------------------------------------------------------------------------------------------------------------------------------------------------------------------------------------------------------------------------------------------------------------------------------------------------------------------------------------------------------------------------------------------------------------------------------------------------------------------------------------------------------------------------------------------------------------------------------------------------------------------------------------------------------------------------------------------------------------------------------------------------------------------------------------------------------------------------------------------------------------------------------------------------------------------------------------------------------------------------------------------------------------------------------------------------------------------------------------------------------------------------------------------------------------------------------------------------------------------------|
| Journal:                      | <i>BMJ Open</i>                                                                                                                                                                                                                                                                                                                                                                                                                                                                                                                                                                                                                                                                                                                                                                                                                                                                                                                                                                                                                                                                                                                                                                                                                                                                                                                                                                                                                                                                                                                                                                                                                                                                                                                                                                                                                                                                                                                                                                                                                                                                                                                                                                                                                                                                                                                               |
| Manuscript ID                 | bmjopen-2019-036671                                                                                                                                                                                                                                                                                                                                                                                                                                                                                                                                                                                                                                                                                                                                                                                                                                                                                                                                                                                                                                                                                                                                                                                                                                                                                                                                                                                                                                                                                                                                                                                                                                                                                                                                                                                                                                                                                                                                                                                                                                                                                                                                                                                                                                                                                                                           |
| Article Type:                 | Protocol                                                                                                                                                                                                                                                                                                                                                                                                                                                                                                                                                                                                                                                                                                                                                                                                                                                                                                                                                                                                                                                                                                                                                                                                                                                                                                                                                                                                                                                                                                                                                                                                                                                                                                                                                                                                                                                                                                                                                                                                                                                                                                                                                                                                                                                                                                                                      |
| Date Submitted by the Author: | 07-Jan-2020                                                                                                                                                                                                                                                                                                                                                                                                                                                                                                                                                                                                                                                                                                                                                                                                                                                                                                                                                                                                                                                                                                                                                                                                                                                                                                                                                                                                                                                                                                                                                                                                                                                                                                                                                                                                                                                                                                                                                                                                                                                                                                                                                                                                                                                                                                                                   |
| Complete List of Authors:     | <p>Russell, Derek ; University of Alabama at Birmingham, Department of Medicine, Division of Pulmonary, Allergy, &amp; Critical Care Medicine; Department of Veterans Affairs, Veterans Integrated Service Network 7<br/>Casey, Jonathan; Vanderbilt University School of Medicine, Department of Medicine, Division of Allergy, Pulmonary and Critical Care Medicine<br/>Gibbs, Kevin ; Wake Forest School of Medicine, Department of Medicine, Section of Pulmonary, Critical Care, Allergy and Immunologic Disease<br/>Dargin, James; Lahey Hospital and Medical Center, Department of Medicine, Division of Pulmonary and Critical Care Medicine<br/>Vonderhaar, Derek ; Ochsner Health System, Department of Pulmonary and Critical Care Medicine<br/>Joffe, AM; University of Washington, Department of Anesthesiology and Pain Medicine<br/>Ghamande, Shekhar; Baylor Scott &amp; White Medical Center, Department of Medicine, Division of Pulmonary Disease and Critical Care Medicine<br/>Khan, Akram; Oregon Health &amp; Science University School of Medicine, Department of Medicine, Division of Pulmonary and Critical Care Medicine<br/>Dutta, Simanta; Wake Forest School of Medicine, Department of Medicine, Section of Pulmonary, Critical Care, Allergy and Immunologic Disease<br/>Landsperger, Janna; Vanderbilt University School of Medicine, Department of Medicine, Division of Allergy, Pulmonary and Critical Care Medicine<br/>Robison, Sarah; University of Alabama at Birmingham, Department of Medicine, Division of Pulmonary, Allergy, &amp; Critical Care Medicine<br/>Bentov, Itay; University of Washington, Department of Anesthesiology and Pain Medicine<br/>Wozniak, Joanne; Lahey Hospital and Medical Center, Department of Medicine, Division of Pulmonary and Critical Care Medicine<br/>Stempek, Susan; Lahey Hospital and Medical Center, Department of Medicine, Division of Pulmonary and Critical Care Medicine<br/>White, Heath; Baylor Scott &amp; White Medical Center, Department of Medicine, Division of Pulmonary Disease and Critical Care Medicine<br/>Krol, Olivia; Oregon Health &amp; Science University School of Medicine, Department of Medicine, Division of Pulmonary and Critical Care Medicine<br/>Prekker, Matthew; Hennepin County Medical Center, Department of</p> |

|           |                                                                                                                                                                                                                                                                                                                                                                                                                                                                                                                                                                                                                                                                                                                                                                                                                                                                                                                                                                                                                                                                                                                                                                                                                                         |
|-----------|-----------------------------------------------------------------------------------------------------------------------------------------------------------------------------------------------------------------------------------------------------------------------------------------------------------------------------------------------------------------------------------------------------------------------------------------------------------------------------------------------------------------------------------------------------------------------------------------------------------------------------------------------------------------------------------------------------------------------------------------------------------------------------------------------------------------------------------------------------------------------------------------------------------------------------------------------------------------------------------------------------------------------------------------------------------------------------------------------------------------------------------------------------------------------------------------------------------------------------------------|
|           | <p>Emergency Medicine; Hennepin County Medical Center, Department of Medicine, Division of Pulmonary/Critical Care Medicine<br/>Driver, Brian; Hennepin County Medical Center, Department of Emergency Medicine<br/>Brewer, Joseph; University of Mississippi Medical Center, Department of Medicine, Division of Pulmonary, Critical Care, and Sleep Medicine<br/>Wang, Li; Vanderbilt University School of Medicine, Department of Medicine, Division of Allergy, Pulmonary and Critical Care Medicine<br/>Lindsell, Christopher; Vanderbilt University School of Medicine, Department of Medicine, Division of Allergy, Pulmonary and Critical Care Medicine<br/>Self, Wesley; Vanderbilt University School of Medicine, Department of Emergency Medicine<br/>Rice, Todd; Vanderbilt University School of Medicine, Department of Medicine, Division of Allergy, Pulmonary and Critical Care Medicine<br/>Semler, Matthew; Vanderbilt University School of Medicine, Department of Medicine, Division of Allergy, Pulmonary and Critical Care Medicine<br/>Janz, David; Louisiana State University School of Medicine in New Orleans, Department of Medicine, Section of Pulmonary/Critical Care Medicine and Allergy/Immunology</p> |
| Keywords: | Adult intensive & critical care < ANAESTHETICS, Thoracic medicine < INTERNAL MEDICINE, Clinical trials < THERAPEUTICS                                                                                                                                                                                                                                                                                                                                                                                                                                                                                                                                                                                                                                                                                                                                                                                                                                                                                                                                                                                                                                                                                                                   |
|           |                                                                                                                                                                                                                                                                                                                                                                                                                                                                                                                                                                                                                                                                                                                                                                                                                                                                                                                                                                                                                                                                                                                                                                                                                                         |

SCHOLARONE™  
Manuscripts

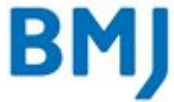

I, the Submitting Author has the right to grant and does grant on behalf of all authors of the Work (as defined in the below author licence), an exclusive licence and/or a non-exclusive licence for contributions from authors who are: i) UK Crown employees; ii) where BMJ has agreed a CC-BY licence shall apply, and/or iii) in accordance with the terms applicable for US Federal Government officers or employees acting as part of their official duties; on a worldwide, perpetual, irrevocable, royalty-free basis to BMJ Publishing Group Ltd ("BMJ") its licensees and where the relevant Journal is co-owned by BMJ to the co-owners of the Journal, to publish the Work in this journal and any other BMJ products and to exploit all rights, as set out in our [licence](#).

The Submitting Author accepts and understands that any supply made under these terms is made by BMJ to the Submitting Author unless you are acting as an employee on behalf of your employer or a postgraduate student of an affiliated institution which is paying any applicable article publishing charge ("APC") for Open Access articles. Where the Submitting Author wishes to make the Work available on an Open Access basis (and intends to pay the relevant APC), the terms of reuse of such Open Access shall be governed by a Creative Commons licence – details of these licences and which [Creative Commons](#) licence will apply to this Work are set out in our licence referred to above.

Other than as permitted in any relevant BMJ Author's Self Archiving Policies, I confirm this Work has not been accepted for publication elsewhere, is not being considered for publication elsewhere and does not duplicate material already published. I confirm all authors consent to publication of this Work and authorise the granting of this licence.

1  
2  
3 **Protocol and statistical analysis plan for the PREventing cardiovascular collaPse**  
4 **with Administration of fluid RESuscitation during Induction and Intubation**  
5 **(PREPARE II) randomized clinical trial**  
6

7  
8 Derek W. Russell\*, MD<sup>1</sup>; Jonathan D. Casey\*, MD, MSc<sup>2</sup>; Kevin W. Gibbs, MD<sup>3</sup>; James  
9 M. Dargin, MD<sup>4</sup>; Derek J. Vonderhaar MD<sup>5</sup>; Aaron M. Joffe, DO<sup>6</sup>; Shekhar Ghamande,  
10 MD<sup>7</sup>; Akram Khan, MD<sup>8</sup>; Simanta Dutta, MD<sup>3</sup>; Janna S. Landsperger, MS, PA-C<sup>2</sup>; Sarah  
11 W. Robison, MD<sup>1</sup>; Itay Bentov, MD, PhD<sup>6</sup>; Joanne M. Wozniak, PA-C<sup>4</sup>; Susan Stempek,  
12 PA-C<sup>4</sup>; Heath D. White, DO, MS<sup>7</sup>; Olivia F. Krol, BS<sup>8</sup>; Matthew E. Prekker, MD<sup>10,11</sup>;  
13 Brian E. Driver, MD<sup>10</sup>; Joseph M. Brewer, DO<sup>12</sup>; Li Wang, MS<sup>2</sup>; Christopher J. Lindsell  
14 PhD<sup>2</sup>; Wesley H. Self, MD, MPH<sup>14</sup>; Todd W. Rice, MD, MSc<sup>2</sup>; Matthew W. Semler\*\*,  
15 MD, MSc<sup>2</sup>; David R. Janz\*\*, MD, MSc<sup>12</sup> for the PREPARE II Investigators# and the  
16 Pragmatic Critical Care Research Group.  
17  
18  
19  
20  
21  
22  
23

24 **Affiliations:**

25 <sup>1</sup>University of Alabama at Birmingham, Department of Medicine, Division of Pulmonary,  
26 Allergy and Critical Care Medicine; Birmingham Veteran's Affairs Medical Center,  
27 Pulmonary Section; <sup>2</sup> Vanderbilt University School of Medicine, Department of Medicine,  
28 Division of Allergy, Pulmonary and Critical Care Medicine; <sup>3</sup>Wake Forest School of  
29 Medicine, Department of Medicine, Section of Pulmonary, Critical Care, Allergy and  
30 Immunologic Disease; <sup>4</sup>Lahey Hospital and Medical Center, Department of Medicine,  
31 Division of Pulmonary and Critical Care Medicine; <sup>5</sup>Ochsner Health System New  
32 Orleans, Department of Pulmonary and Critical Care Medicine; <sup>6</sup>University of  
33 Washington, Department of Anesthesiology and Pain Medicine; <sup>7</sup>Baylor Scott & White  
34 Medical Center, Department of Medicine, Division of Pulmonary Disease and Critical  
35 Care Medicine; <sup>8</sup>Oregon Health and Science University School of Medicine, Department  
36 of Medicine, Division of Pulmonary and Critical Care Medicine; <sup>9</sup>University of  
37 Washington School of Medicine, Department of Medicine, Division of Pulmonary/Critical  
38 Care; <sup>10</sup>Hennepin County Medical Center, Department of Emergency Medicine;  
39 <sup>11</sup>Hennepin County Medical Center, Department of Medicine, Division of  
40 Pulmonary/Critical Care Medicine; <sup>12</sup>University of Mississippi Medical Center,  
41 Department of Medicine, Division of Pulmonary, Critical Care, and Sleep Medicine;  
42 <sup>13</sup>Louisiana State University School of Medicine New Orleans, Department of Medicine,  
43 Section of Pulmonary/Critical Care Medicine and Allergy/Immunology; <sup>14</sup>Vanderbilt  
44 University School of Medicine, Department of Emergency Medicine.  
45  
46  
47  
48

49 \*Authors contributed equally

50 \*\*Authors contributed equally

51 #See below for a full list of the PREPARE II Investigators  
52  
53

54 **Corresponding Author:**

55 Derek W. Russell, MD  
56  
57  
58  
59  
60

**Email:**[dwrussell@uabmc.edu](mailto:dwrussell@uabmc.edu)**Address:**

Lyons Harrison Research Building Room 321  
701 19<sup>th</sup> St. S  
Birmingham, AL 35294

**Telephone:**

205-996-1496

**Fax:**

205-996-4699

**Author contributions:** All study authors approved the final version of this manuscript. Study concept and design: D.W.R., J.D.C., M.W.S., D.R.J., C.J.L., L.W., W.H.S., and T.W.R.; Acquisition of data: D.W.R., J.D.C., K.W.G., J.D., D.J.V., A.M.J., S.G., A.K., S.D., J.S.L., S.R., I.B., J.W., H.W., O.F.K., M.E.P., B.E.D., J.M.B., K.M.D., J.W., K.G., K.W.G., S.G., A.K., W.H.S., S.S., K.D., C.B., A.M.W., A.C.A., T.L., S.N., M.K.J., T.W.R., M.W.S. and D.R.J.; Drafting of the manuscript: D.W.R., J.D.C., D.R.J., M.W.S.; Critical revision of the manuscript for important intellectual content: D.W.R., J.D.C., K.W.G., J.D., D.J.V., A.M.J., S.G., A.K., S.D., J.S.L., S.R., I.B., J.W., H.W., O.F.K., M.E.P., B.E.D., J.M.B., K.M.D., J.W., K.G., K.W.G., S.G., A.K., W.H.S., S.S., K.D., C.B., A.M.W., A.C.A., T.L., S.N., M.K.J., C.J.L., L.W., T.W.R., M.W.S. and D.R.J.; Study supervision: D.R.J. and M.W.S.

**Sources of Funding:** Jonathan D. Casey was supported in part by the NHLBI (2T32HL087738-12 and K12HL133117). Matthew W. Semler was supported in part by the NHLBI (K23HL143053). Derek W. Russell was supported in part by the UAB Walter Frommeyer, Jr. Fellowship in Investigative Medicine and by the Department of Veteran's Affairs (VISN 7 Research Development Award). Data collection utilized the Research Electronic Data Capture (REDCap) tool developed and maintained with Vanderbilt Institute for Clinical and Translational Research grant support (UL1 TR002234 from NCATS/NIH). The funding institutions had no role in (1) conception, design, or conduct of the study, (2) collection, management, analysis, interpretation, or presentation of the data, or (3) preparation, review, or approval of the manuscript.

1  
2  
3 **Competing Interest Statement:** The authors report no conflicts of interest with the  
4 contents of this manuscript.  
5  
6  
7

8 **Key words for indexing:** Endotracheal intubation, fluid loading, post-intubation  
9 hypotension, cardiovascular collapse  
10  
11  
12

13 Manuscript Word Count (body only): 4099 words

14 Abstract Word Count: 295/300  
15  
16  
17

18 Supplemental digital content is available for this article.  
19  
20  
21  
22  
23  
24  
25  
26  
27  
28  
29  
30  
31  
32  
33  
34  
35  
36  
37  
38  
39  
40  
41  
42  
43  
44  
45  
46  
47  
48  
49  
50  
51  
52  
53  
54  
55  
56  
57  
58  
59  
60

**Abstract:**

**Introduction:** Cardiovascular collapse is a common complication during tracheal intubation of critically ill adults. Whether administration of an intravenous fluid bolus prevents cardiovascular collapse during tracheal intubation remains uncertain. A prior randomized trial found fluid bolus administration to be ineffective overall but suggested potential benefit for patients receiving positive pressure ventilation during tracheal intubation.

**Methods and Analysis:**

The PREventing cardiovascular collapse with Addministration of fluid REsuscitation during Induction and Intubation (PREPARE II) trial is a prospective, multi-center, non-blinded randomized trial being conducted in 13 academic intensive care units in the United States. The trial will randomize 1,065 critically ill adults undergoing tracheal intubation with planned use of positive pressure ventilation (non-invasive ventilation or bag-mask ventilation) between induction and laryngoscopy to receive 500 mL of intravenous crystalloid or no intravenous fluid bolus. The primary outcome is cardiovascular collapse, defined as any of: SBP <65 mm Hg, new or increased vasopressor administration between induction and 2 minutes after intubation, or cardiac arrest or death between induction and 1 hour after intubation. The primary analysis will be an unadjusted, intention-to-treat comparison of the primary outcome between patients randomized to fluid bolus administration and patients randomized to no fluid bolus administration using a Chi-square test. The sole secondary outcome is 28-day in-



1  
2  
3 hospital mortality. Enrolment began on February 1, 2019 and is expected to conclude in  
4  
5 June, 2020.  
6  
7  
8  
9

### 10 **Ethics and Dissemination:**

11 The trial was approved by either the central institutional review board at Vanderbilt  
12  
13 University Medical Center or the local institutional review board at each trial site (details  
14  
15 in **Supplemental file 1, Item 2**). Results will be submitted for publication in a peer-  
16  
17 reviewed journal and presented at scientific conferences.  
18  
19  
20  
21  
22  
23

### 24 **Trial Registration:**

25 This trial was registered with ClinicalTrials.gov (NCT03787732) on December 25, 2018,  
26  
27 prior to the enrolment of the first patient.  
28  
29  
30  
31  
32  
33  
34  
35  
36  
37  
38  
39  
40  
41  
42  
43  
44  
45  
46  
47  
48  
49  
50  
51  
52  
53  
54  
55  
56  
57  
58  
59  
60

### Strengths and Limitations:

- This ongoing pragmatic trial will examine the effect of a 500 mL intravenous fluid bolus on the incidence of cardiovascular collapse among critically ill adults undergoing tracheal intubation with positive-pressure ventilation.
- Broad eligibility criteria and enrolment at multiple centers will increase the external validity of the findings.
- Blinding is impractical due to the nature of this study intervention.
- The trial is not designed to examine the effects of fluid composition or volume of fluid administered.

## Introduction:

Tracheal intubation is common in the care of critically ill patients but is associated with a high incidence of complications<sup>1-3</sup>. Cardiovascular collapse is a composite of life-threatening haemodynamic complications of tracheal intubation comprised of post-intubation hypotension<sup>4-6</sup>, administration of vasopressors to treat hypotension, cardiac arrest, and death. Cardiovascular collapse occurs in 20-30% of critically ill patients undergoing tracheal intubation<sup>7 8</sup>, and is associated with increased in-hospital mortality<sup>5 6 9</sup>.

Some airway management experts recommend the intravenous administration of a fluid bolus beginning prior to induction (i.e., the administration of procedural drugs such as anaesthetics) to prevent cardiovascular collapse during tracheal intubation<sup>4 10</sup>. A fluid bolus could address the haemodynamic perturbations induced by induction and tracheal intubation, which include vasodilatory effects of induction medications, increased venous capacitance due to decreased circulating catecholamines, and decreased venous return secondary to positive pressure applied to the thoracic cavity. However, the only reported trial to examine administration of a pre-intubation fluid bolus, the PrePARE (Preventing cardiovascular collaPse with Administration of fluid Resuscitation before Endotracheal intubation) trial, reported that a pre-intubation fluid bolus had no effect on the overall rate of cardiovascular collapse<sup>8</sup>. The receipt of positive pressure ventilation, however, appeared to modify the effect of a fluid bolus administration on cardiovascular collapse in the PrePARE trial. Patients receiving positive pressure ventilation appeared to have a lower rate cardiovascular collapse in the fluid bolus group compared to the no fluid bolus group, both among patients

1  
2  
3 receiving non-invasive ventilation for pre-oxygenation (RR 0.51; 95% confidence  
4 interval [CI], 0.24-1.09; P value for interaction = 0.032) and among patients receiving  
5 bag-mask ventilation between induction and laryngoscopy (RR 0.61; 95% CI, 0.33-1.13;  
6  
7 P value for interaction = 0.008)<sup>8</sup>.

8  
9  
10  
11  
12 Provision of positive pressure ventilation with a bag-mask device between  
13 induction and laryngoscopy has been shown to decrease the incidence of severe  
14 hypoxaemia during tracheal intubation of intensive care unit (ICU) patients (relative risk,  
15 0.48; 95%, CI, 0.30 to 0.77)<sup>11</sup>. These results, and others examining use of non-invasive  
16 ventilation for pre-oxygenation during ICU intubations<sup>12</sup>, suggest that positive pressure  
17 ventilation should be provided during tracheal intubation for most critically ill patients<sup>10</sup>.  
18  
19 This increases the importance of investigating the finding from the PrePARE trial that a  
20 pre-induction fluid bolus might prevent cardiovascular collapse among patients receiving  
21 positive pressure ventilation. We designed the PREventing cardiovascular collaPse with  
22 Admistration of fluid REsuscitation during Induction and Intubation (PREPARE II) trial  
23 to examine the hypothesis that administration of a fluid bolus beginning prior to  
24 induction will decrease the incidence of cardiovascular collapse among critically ill  
25 adults undergoing tracheal intubation with positive pressure ventilation between  
26 induction and laryngoscopy.

## 27 28 29 30 31 32 33 34 35 36 37 38 39 40 41 42 43 44 45 46 47 **Methods and Analysis:**

48  
49 This manuscript was written in accordance with Standard Protocol Items:  
50 Recommendations for Interventional Trials (SPIRIT) guidelines (see **Table 1** below and  
51 **Supplementary file 1, Item 1**)<sup>13</sup>.  
52  
53  
54  
55  
56  
57  
58  
59  
60

| Table 1                                                                                                                                                                                                                                                                                                                                                                                                                                                                                                                                                                                                                                                                                                                                                                                                                                                                                                                                                                                                                                                                                                            | STUDY PERIOD           |                                            |                |    |                   |                |                  |                                       |
|--------------------------------------------------------------------------------------------------------------------------------------------------------------------------------------------------------------------------------------------------------------------------------------------------------------------------------------------------------------------------------------------------------------------------------------------------------------------------------------------------------------------------------------------------------------------------------------------------------------------------------------------------------------------------------------------------------------------------------------------------------------------------------------------------------------------------------------------------------------------------------------------------------------------------------------------------------------------------------------------------------------------------------------------------------------------------------------------------------------------|------------------------|--------------------------------------------|----------------|----|-------------------|----------------|------------------|---------------------------------------|
|                                                                                                                                                                                                                                                                                                                                                                                                                                                                                                                                                                                                                                                                                                                                                                                                                                                                                                                                                                                                                                                                                                                    | Enrollment             | Allocation                                 | On-Study       |    |                   |                |                  | On-Study                              |
| TIMEPOINT                                                                                                                                                                                                                                                                                                                                                                                                                                                                                                                                                                                                                                                                                                                                                                                                                                                                                                                                                                                                                                                                                                          | Decision to perform TI | Between decision to intubate and Induction | Sedative & NMB | TI | 2 minutes post-TI | 1 hour post TI | 24 hours post-TI | Discharge or 28 days after enrollment |
| ENROLMENT:                                                                                                                                                                                                                                                                                                                                                                                                                                                                                                                                                                                                                                                                                                                                                                                                                                                                                                                                                                                                                                                                                                         | X                      |                                            |                |    |                   |                |                  |                                       |
| Eligibility screen                                                                                                                                                                                                                                                                                                                                                                                                                                                                                                                                                                                                                                                                                                                                                                                                                                                                                                                                                                                                                                                                                                 | X                      |                                            |                |    |                   |                |                  |                                       |
| Allocation                                                                                                                                                                                                                                                                                                                                                                                                                                                                                                                                                                                                                                                                                                                                                                                                                                                                                                                                                                                                                                                                                                         |                        | X                                          |                |    |                   |                |                  |                                       |
| INTERVENTIONS:                                                                                                                                                                                                                                                                                                                                                                                                                                                                                                                                                                                                                                                                                                                                                                                                                                                                                                                                                                                                                                                                                                     |                        |                                            |                |    |                   |                |                  |                                       |
| Fluid Bolus Initiation                                                                                                                                                                                                                                                                                                                                                                                                                                                                                                                                                                                                                                                                                                                                                                                                                                                                                                                                                                                                                                                                                             |                        | X                                          |                |    |                   |                |                  |                                       |
| Screening for contraindications                                                                                                                                                                                                                                                                                                                                                                                                                                                                                                                                                                                                                                                                                                                                                                                                                                                                                                                                                                                                                                                                                    | X                      | X                                          |                |    |                   |                |                  |                                       |
| No New Fluid Bolus                                                                                                                                                                                                                                                                                                                                                                                                                                                                                                                                                                                                                                                                                                                                                                                                                                                                                                                                                                                                                                                                                                 |                        | X                                          |                |    |                   |                |                  |                                       |
| Screening for contraindications                                                                                                                                                                                                                                                                                                                                                                                                                                                                                                                                                                                                                                                                                                                                                                                                                                                                                                                                                                                                                                                                                    | X                      | X                                          |                |    |                   |                |                  |                                       |
| ASSESSMENTS:                                                                                                                                                                                                                                                                                                                                                                                                                                                                                                                                                                                                                                                                                                                                                                                                                                                                                                                                                                                                                                                                                                       |                        |                                            |                |    |                   |                |                  |                                       |
| Baseline Variables                                                                                                                                                                                                                                                                                                                                                                                                                                                                                                                                                                                                                                                                                                                                                                                                                                                                                                                                                                                                                                                                                                 | X                      | X                                          |                |    |                   |                |                  |                                       |
| Peri-procedural variables                                                                                                                                                                                                                                                                                                                                                                                                                                                                                                                                                                                                                                                                                                                                                                                                                                                                                                                                                                                                                                                                                          |                        | X                                          | X              | X  | X                 |                |                  |                                       |
| Clinical Outcomes                                                                                                                                                                                                                                                                                                                                                                                                                                                                                                                                                                                                                                                                                                                                                                                                                                                                                                                                                                                                                                                                                                  |                        |                                            |                |    |                   | X              | X                | X                                     |
| <p>Baseline variables obtained from medical record include: demographic characteristics, APACHEII score, and presence of sepsis/septic shock. Peri-procedural data collected by independent, trained observer includes the following: whether fluids were infusing prior to enrollment, receipt of the study intervention, the volume of study crystalloid infused (induction and 2 minutes after procedure), use of prophylactic vasopressor (or prophylactically increased vasopressor dose), addition of new vasopressor (or increased vasopressor dose), and systolic blood pressure (at baseline and nadir from induction to 2 minutes after procedure). Peri-procedural data collected by operator includes: sedation drugs used (and doses), oxygenation/ventilation modality between induction and laryngoscopy, and procedural complications. Clinical outcomes include: vital status (overall in-hospital death, cardiac arrest death within 1 hour of TI), number of ventilator-free days to 28 days, and number of ICU-free days to 28 days. TI: tracheal intubation. NMB: neuromuscular blockade.</p> |                        |                                            |                |    |                   |                |                  |                                       |

### *Patient and Public Involvement*

Materials used to communicate about the study with patients and family members were developed with input from the Vanderbilt Community Advisory Council.

1  
2  
3 Study authors will disseminate the results of this study online and via social media in  
4 forms suitable for public understanding.  
5  
6  
7  
8  
9

### 10 *Study Design*

11  
12 The PREPARE II trial is a pragmatic, multi-center, un-blinded, parallel group,  
13 randomized trial. Among critically ill adults undergoing tracheal intubation undergoing  
14 positive pressure ventilation between induction and laryngoscopy, PREPARE II  
15 compares incidence of cardiovascular collapse between patients administered  
16 intravenous administration of a 500 mL fluid bolus and those receiving no fluid bolus  
17 administration. The trial protocol was approved with waiver of informed consent by  
18 either the central institutional review board at Vanderbilt University Medical Center or  
19 the local institutional review board at each trial site. The trial was registered prior to  
20 initiation of enrolment (ClinicalTrials.gov identifier: NCT03787732). An independent data  
21 and safety monitoring board (DSMB) is monitoring the progress and safety of the trial.  
22  
23  
24  
25  
26  
27  
28  
29  
30  
31  
32  
33  
34  
35  
36  
37

### 38 *Study Sites*

39  
40 PREPARE II is being conducted in 13 intensive care units at academic medical  
41 centers across the United States. Site characteristics are listed in **Supplementary file**  
42 **1, Item 2.**  
43  
44  
45  
46  
47  
48

### 49 *Population*

50  
51 The trial includes adults (age  $\geq$  18 years) located in a participating ICU for whom  
52 the treating clinicians have determined that tracheal intubation is required and for whom  
53  
54  
55  
56  
57  
58  
59  
60

1  
2  
3 the planned procedural approach includes an operator who routinely performs tracheal  
4  
5 intubation in the participating unit, administration of sedation (with or without  
6  
7 neuromuscular blockade), and positive-pressure ventilation between induction and  
8  
9 laryngoscopy. The trial excludes pregnant women, prisoners, and patients for whom the  
10  
11 treating clinicians feel that the urgency of the intubation precludes safe performance of  
12  
13 study procedures or feel that fluid bolus administration is either required or  
14  
15 contraindicated.  
16  
17  
18  
19  
20

### 21 *Randomization and Treatment Allocation*

22  
23 Patients are randomized in a 1:1 ratio to intravenous fluid bolus administration or  
24  
25 no fluid bolus administration in permuted blocks of two, four, or six, stratified according  
26  
27 to study site. Study-group assignments (see **Supplementary file 1, Item 3; Figure S1**)  
28  
29 are placed in sequentially numbered opaque envelopes and remain concealed until  
30  
31 after enrolment. After enrolment and randomization, patients, treating clinicians, and  
32  
33 study personnel are not blinded to study group assignment.  
34  
35  
36  
37  
38  
39

### 40 *Study Interventions*

#### 41 Fluid Bolus Group

42  
43 For patients who are assigned to the fluid bolus group, intravenous infusion of  
44  
45 500 mL of a crystalloid solution of the operator's choosing is initiated after  
46  
47 randomization and prior to induction. The fluid bolus is infused from above the level of  
48  
49 the intravenous or intra-osseous access and allowed to infuse by gravity, manual  
50  
51 pressure, or bag pressure. The fluid bolus is discontinued after 500 mL have infused.  
52  
53  
54  
55  
56  
57  
58  
59  
60

1  
2  
3 For patients assigned to the fluids bolus group who are already receiving a fluid  
4  
5 infusion, administration of 500mL of fluids between randomization and induction is  
6  
7 achieved with either an additional bolus or increasing the rate of the existing infusion.  
8  
9

### 10 11 12 No Fluid Bolus Group

13  
14 For patients who are assigned to the no fluid bolus group, intravenous fluid  
15  
16 administration is not initiated between randomization and induction. Intravenous fluid  
17  
18 infusions initiated prior to randomization are not altered.  
19  
20

### 21 22 Co-Interventions

23  
24  
25  
26 Regardless of study group assignment, treating clinicians determine the timing of  
27  
28 induction and tracheal intubation. Treating clinicians may stop infusion of a fluid bolus,  
29  
30 increase or decrease the rate of infusion, or add a new fluid bolus at any time if felt to  
31  
32 be required for the optimal care of the patient. Study group assignment determines only  
33  
34 the initiation of intravenous fluid bolus administered between randomization and  
35  
36 induction. **Figure 1** depicts the timeline of study procedures in the context of the  
37  
38 tracheal intubation procedure.  
39  
40

41  
42 Because the study enrolls only patients for whom treating clinicians plan to  
43  
44 administer positive-pressure ventilation between induction and laryngoscopy, most  
45  
46 patients receive either non-invasive ventilation or bag-mask ventilation between  
47  
48 induction and laryngoscopy. Instances in which positive-pressure ventilation between  
49  
50 induction and laryngoscopy is not administered are recorded, along with the reason that  
51  
52  
53  
54  
55  
56  
57  
58  
59  
60



1  
2  
3 positive-pressure ventilation was not administered (e.g., emesis arising between  
4  
5 randomization and induction).  
6

7  
8 Treating clinicians determine the decision to intubate, modality and timing of pre-  
9  
10 oxygenation, choice, dose, and timing of medications for induction and neuromuscular  
11  
12 blockade, decision to administer vasopressors before or after induction, choice of  
13  
14 laryngoscope, use of cricoid pressure, method of positive pressure ventilation (non-  
15  
16 invasive ventilation or bag-mask ventilation) between induction and laryngoscopy,  
17  
18 decision to administer intravenous fluid for the treatment of hypotension, and use of  
19  
20 additional airway management equipment and personnel. Data on these co-  
21  
22 interventions is prospectively collected.  
23  
24

25  
26 In some participating units, patients may be co-enrolled in a randomized trial  
27  
28 comparing use of bougie versus use of an endotracheal tube with stylet on the first  
29  
30 attempt at tracheal intubation (ClinicalTrials.gov, NCT03928925). An interaction  
31  
32 between the interventions evaluated in these trials is not anticipated and the results will  
33  
34 be reported separately.  
35  
36  
37  
38  
39

#### 40 *Data Collection*

41  
42 Data collection for this study is described in detail in **Supplementary file 1, Item**  
43  
44 **4** and **Table 1** provides further detail on data collection procedures.  
45  
46  
47  
48

#### 49 *Primary Outcome*

50  
51 The primary outcome is cardiovascular collapse, defined as the occurrence of  
52  
53 one or more of the following: Systolic blood pressure (SBP) < 65 mmHg between  
54  
55  
56  
57  
58  
59  
60

1  
2  
3 induction and 2 minutes after intubation; new or increased vasopressor administration  
4  
5 between induction and 2 minutes after intubation; cardiac arrest between induction and  
6  
7 1 hour after intubation; or death between induction and 1 hour after intubation.  
8  
9

10 Cardiovascular collapse is a commonly used endpoint in airway management  
11  
12 research<sup>4 8</sup>. Cardiovascular collapse is considered a “reasonably likely surrogate  
13  
14 endpoint” for short-term mortality because a strong mechanistic rationale links severe  
15  
16 hypotension and cardiac arrest to short-term mortality and interventions that prevent  
17  
18 cardiovascular collapse might reasonably be expected to prevent short-term mortality<sup>17</sup>.  
19  
20 Cardiovascular collapse was the primary outcome of the recently completed PrePARE  
21  
22 trial<sup>8</sup>, on which the design of the PREPARE II trial was based. In the PrePARE trial, the  
23  
24 absolute risk of in-hospital mortality was 16.7% (95% CI 3.4% to 30.0%) higher among  
25  
26 patients who experienced cardiovascular collapse during intubation compared with  
27  
28 patients who did not<sup>8</sup>.  
29  
30  
31  
32  
33  
34

### 35 *Secondary Outcome*

36  
37 The sole secondary outcome is 28-day all-cause in-hospital mortality  
38  
39 (**Supplementary file 1, Item 5**). Short-term mortality is a commonly used patient-  
40  
41 centered clinical endpoint for randomized trials in intensive care medicine and may be  
42  
43 mechanistically associated with the primary outcome of cardiovascular collapse.  
44  
45  
46  
47  
48

### 49 *Exploratory Clinical Outcomes*

- 50  
51 • Each individual component of the composite primary endpoint:
  - 52  
53 ○ SBP < 65 mmHg between induction and 2 minutes after intubation
  - 54  
55  
56  
57  
58  
59

- new or increased vasopressor administration between induction and 2 minutes after intubation
- cardiac arrest between induction and 1 hour after intubation
- death between induction and 1 hour after intubation.
- Lowest SBP between induction and 2 minutes after intubation
- Change in SBP from induction to lowest SBP between induction and 2 minutes after intubation
- Ventilator-free days to 28 days (defined in **Supplementary file 1, Item 6**)
- ICU-free days to 28 days (defined in **Supplementary file 1, Item 7**)

#### *Exploratory Safety Outcomes*

- Lowest arterial oxygen saturation between induction and 2 minutes after intubation
- Incidence of hypoxaemia (oxygen saturation < 90%) between induction and 2 minutes after intubation
- Incidence of severe hypoxaemia (oxygen saturation < 80%) between induction and 2 minutes after intubation
- Oxygen saturation at 24 hours after intubation
- Fraction of inspired oxygen at 24 hours after intubation
- Positive end expiratory pressure at 24 hours after intubation
- SBP at 24 hours after intubation

#### *Exploratory Process Measures*

- Initiation of an intravenous fluid bolus between induction and 2 minutes after intubation
- Time from induction to successful intubation
- Incidence of successful intubation on the first laryngoscopy attempt
- Number of laryngoscopy attempts
- Cormack-Lehane grade of glottic view on first attempt
- Operator-assessed difficulty of intubation
- Need for additional airway equipment or a second operator

### *Initial Sample Size Estimation*

In a prior randomized trial comparing fluid bolus administration beginning prior to induction versus no fluid bolus administration in the same setting as the current trial, the incidence of cardiovascular collapse was 19.6% in the fluid bolus group and 18.3% in the no fluid bolus group overall. However, among the subgroup of patients assigned to receive positive pressure ventilation with a bag-mask device between induction and laryngoscopy, the incidence of cardiovascular collapse was 16.0% in the fluid bolus group and 26.2% in the no fluid bolus group (10% absolute risk difference and 40% relative risk difference). Assuming more conservative rates of cardiovascular collapse of 16.25% in the fluid bolus group and 25.0% in the no fluid bolus group (8.75% absolute risk difference and 35% relative risk difference), we calculated that enrolling 714 patients would provide 80 percent statistical power at a two-sided alpha level of 0.05. Anticipating less than 5% missing data for the primary outcome, the initial planned enrolment for the trial was 750 patients. The study protocol included a pre-specified

1  
2  
3 sample size re-estimation following the single interim analysis (see *Sample Size Re-*  
4 *estimation*)  
5  
6  
7  
8  
9

#### 10 *Data and Safety Monitoring Board (DSMB) and Interim Analysis*

11  
12 A DSMB composed of experts in clinical trials, critical care medicine,  
13 anaesthesia, and emergency medicine is overseeing the design and conduct of the trial.  
14  
15 The DSMB conducted a single interim analysis for efficacy and safety at the anticipated  
16  
17 halfway point of the trial, after enrolment of 375 patients, on November 12, 2019.  
18  
19 Stopping criteria were pre-specified in the study protocol, suggesting termination of the  
20  
21 trial at the interim if the P value for the difference between groups in the incidence of the  
22  
23 primary outcome (cardiovascular collapse) or secondary outcome (28-day in-hospital  
24  
25 mortality) were 0.001 or less using a chi-square test. Using this conservative Haybittle–  
26  
27 Peto boundary ( $P \leq 0.001$ ) allows the final analysis at the end of the trial to be  
28  
29 performed using an unchanged level of significance.  
30  
31  
32  
33  
34

35  
36 The DSMB also formally evaluated the trial for safety and examined the highest  
37  
38 fraction of inspired oxygen, highest positive end expiratory pressure, and lowest arterial  
39  
40 oxygen saturation at 24 hours after intubation in each study group. The prespecified  
41  
42 early stopping criteria for physiologic outcomes were as follows: if the P value for the  
43  
44 difference between study groups in any of these three physiologic variables were 0.001  
45  
46 or less using a Mann-Whitney rank-sum test and concordant in direction with the point-  
47  
48 estimate for mortality.  
49  
50

51  
52 At the interim analysis, finding that no stopping criteria had been met and no  
53  
54 safety concerns were observed, the DSMB recommended continuing the trial.  
55  
56  
57  
58  
59  
60

### *Sample Size Re-Estimation*

The study protocol specified that, after completion of the interim analysis and the recommendation to continue enrolment, “the DSMB will evaluate the rate of the primary outcome in the no fluid bolus group. If the incidence of the primary outcome in the no fluid bolus group differs from the original estimate of 25.0%, the DSMB may ask that the investigators perform a sample size re-estimation to maintain adequate statistical power to detect the planned relative risk difference in the primary outcome between groups.”

After completion of the interim analysis and the recommendation to continue enrolment, the DSMB examined the number of patients that would need to be enrolled in order to maintain 80% statistical power to detect the planned relative risk reduction of 35% in the primary outcome. Based on this information, the DSMB recommended increasing the total sample size from 750 to 1,065 patients. The investigators accepted the DSMB’s recommendation, revising the planned sample size for the final trial to 1,065 patients. During the sample size re-estimation, both the study investigators and the DSMB remained blind to all outcomes by study group. No further interim analyses are planned.

### *Statistical Analysis Principles*

R version 3.5.2 (R Foundation for Statistical Computing, Vienna, Austria) will be used for all analyses. Continuous variables will be reported as mean  $\pm$  SD or median and IQR; categorical variables will be reported as frequencies and proportions.

1  
2  
3 Between-group comparisons will be made with the Mann-Whitney rank-sum test for  
4  
5 continuous variables, and the chi-square test for categorical variables  
6  
7  
8  
9

#### 10 *Primary Analysis of the Primary Outcome*

11  
12 The primary analysis will be an unadjusted, intention-to-treat comparison of  
13  
14 patients randomized to the fluid bolus group versus patients randomized to the no fluid  
15  
16 bolus group with regard to the primary outcome of cardiovascular collapse. Between  
17  
18 group differences will be tested using an unadjusted chi-square test. A P value < 0.05  
19  
20 will be used to indicate statistical significance for the primary analysis.  
21  
22  
23  
24  
25

#### 26 *Secondary Analyses of the Primary Outcome*

27  
28 To account for potential confounders, we will develop a logistic regression model  
29  
30 with cardiovascular collapse (primary outcome) as the dependent variable and  
31  
32 independent variables to include study group (fluid bolus group vs no fluid bolus group)  
33  
34 and relevant confounders (age, APACHE II score at enrolment, presence of sepsis or  
35  
36 septic shock, vasopressor receipt in the hour prior to enrolment, and receipt of  
37  
38 intravenous fluid infusion initiated prior to enrolment). We will also develop a logistic  
39  
40 regression model accounting for the above variables plus any baseline characteristics  
41  
42 that appear on visual review to be potentially imbalanced between the study groups.  
43  
44  
45  
46

47 Because patients within a specific ICU may be more similar to other patients  
48  
49 within the same ICU than to patients in other ICUs, we will fit a generalized linear  
50  
51 mixed-effects model with the outcome of cardiovascular collapse, including group  
52  
53 assignment as a fixed effect and study unit (stratification variable) as a random effect.  
54  
55  
56  
57  
58  
59  
60

1  
2  
3 We will repeat the primary analysis using alternative definitions of  
4 cardiovascular collapse, including: (1) using an SBP < 90 mm Hg rather than an SBP  
5 <65 mm Hg, (2) using 28-day in-hospital mortality rather than death within 1 hour, and  
6  
7  
8  
9  
10 (3) using days from enrolment to in-hospital death (defined in **Supplementary file 1,**  
11  
12 **Item 8**) rather than death within 1 hour.  
13

14  
15 Interpreting composite endpoints can be challenging when the components have  
16 different levels of clinical importance. We will repeat the primary analysis of the primary  
17 outcome using a global rank scale. Use of a hierarchical global rank score places  
18 greater weight on the objective, patient-centered clinical outcomes (death, cardiac  
19 arrest) than on the immediate physiologic outcomes (hypotension and vasopressors).  
20  
21 The global rank endpoint will be constructed by comparing each patient with every other  
22 patient in the study and assigning a score for each pairwise comparison based on  
23 whom fared better. To make the pairwise comparison, we will consider a priority order of  
24 endpoints: (1) death within one hour of intubation; (2) cardiac arrest within one hour of  
25 intubation; (3) SBP < 65 mmHg between induction and two minutes after intubation; and  
26  
27 (4) new or increased vasopressor administration between induction and two minutes  
28 after intubation. The scores will be summarized and compared between study groups  
29 (fluid bolus group vs no fluid bolus group) using an unadjusted Mann-Whitney U test.  
30  
31  
32  
33  
34  
35  
36  
37  
38  
39  
40  
41  
42  
43

44 Given the findings of the PrePARE trial subgroup analysis (i.e., that the effect of  
45 fluid bolus administration on cardiovascular collapse may be related to the receipt of  
46 positive pressure ventilation during intubation)<sup>8</sup>, we will repeat the primary analysis  
47 excluding patients who did not receive positive pressure during intubation. Because  
48 many critical care patients are already receiving intravenous fluid for other indications  
49  
50  
51  
52  
53  
54  
55  
56  
57  
58  
59  
60



1  
2  
3 when the decision is made to intubate and this may modify the effect of a new fluid  
4  
5 bolus, we will repeat the primary analysis excluding patients who were already receiving  
6  
7 intravenous fluid at the time of enrolment.  
8  
9

### 10 11 12 *Analysis of Effect Modification for the Primary Outcome* 13

14 We will examine whether pre-specified baseline variables modify the effect of  
15  
16 treatment group on the primary outcome using formal tests of statistical interaction in a  
17  
18 logistic regression model. Independent variables will include study group assignment,  
19  
20 the potential effect modifier of interest, and the interaction between the two (e.g., study  
21  
22 group \* presence of sepsis or septic shock). Significance will be determined by the P  
23  
24 value for the interaction term, with values less than 0.10 considered to suggest of a  
25  
26 potential interaction and values less than 0.05 considered to confirm an interaction.  
27  
28 Continuous variables will be analyzed using restricted cubic splines and preferentially  
29  
30 displayed as continuous variables with 3-5 knots using a locally weighted regression or  
31  
32 partial effects plots. We will use a forest plot to display the effect of covariates. If  
33  
34 required for data presentation, continuous variables will be dichotomized for inclusion in  
35  
36 a forest plot. We will examine whether the following baseline variables modify the effect  
37  
38 of study group on the primary outcome:  
39  
40  
41  
42  
43

- 44 1. APACHE II score at enrolment (continuous variable);
- 45 2. Presence of sepsis or septic shock at time of enrolment (yes/no);
- 46 3. Receipt of vasopressors in the 1 hour prior to enrolment (yes/no);
- 47 4. Predicted probability of cardiovascular collapse as calculated by a pre-  
48  
49  
50  
51  
52  
53  
54  
55  
56  
57  
58  
59  
60 specified multivariable model (continuous variable);

1  
2  
3  
4  
5  
6 In addition to the above variables which can be assessed prior to study  
7  
8 enrolment, we will perform exploratory analyses examining additional potential effect  
9  
10 modifiers that are intended to represent patient physiology at baseline, but which are  
11  
12 collected between enrolment and induction and therefore have the theoretical potential  
13  
14 to be affected by study group assignment. These include:  
15

- 16  
17 1. Receipt of positive pressure ventilation for pre-oxygenation (via either non-  
18  
19 invasive mechanical ventilation or bag-mask ventilation) (yes/no);  
20
- 21  
22 2. Choice of sedative medication (etomidate, ketamine, propofol, other);  
23
- 24  
25 3. New or increased vasopressor administration prior to or with induction  
26  
27 (yes/no);  
28
- 29  
30 4. SBP at induction (continuous variable in mm Hg)  
31
- 32  
33 5. Oxygen saturation at induction (continuous variable in %)  
34

35  
36 Finally, to examine our assumption that no interaction will exist between the  
37  
38 interventions evaluated in the PREPARE II and BOUGIE trials, among patients co-  
39  
40 enrolled to these trials, we will examine whether BOUGIE group assignment modifies  
41  
42 the primary outcome. If, contrary to our expectation, an interaction is confirmed (based  
43  
44 on criteria listed above for interaction testing), the BOUGIE group assignment will be  
45  
46 added to the adjustment model for the primary outcome of cardiovascular collapse.  
47  
48  
49  
50

### 51 *Analysis of the Secondary Outcome*

52  
53  
54  
55  
56  
57  
58  
59  
60

1  
2  
3 The sole secondary outcome of 28-day in-hospital mortality will be compared  
4  
5 between patients randomized to the fluid bolus group versus patients randomized to the  
6  
7 no fluid bolus group using an unadjusted chi-squared test.  
8  
9

### 10 11 12 *Analyses of Exploratory Outcomes*

13  
14 All pre-specified exploratory outcomes will be compared between patients  
15  
16 randomized to the fluid bolus group versus patients randomized to the no fluid bolus  
17  
18 group. Continuous outcomes will be compared with the Mann-Whitney U test and  
19  
20 categorical variables with the chi-square test. In a sensitivity analysis using data only  
21  
22 from each patient's first tracheal intubation in the PREPARE II dataset, we will compare  
23  
24 the fluid group to the no fluid bolus group with regard to in-hospital mortality, ventilator-  
25  
26 free days, and ICU-free days.  
27  
28  
29  
30  
31

### 32 *Handling of Missing Data*

33  
34 Although we have allowed for up to 5% missingness in our power calculation, we  
35  
36 do not anticipate that data for the primary outcome of cardiovascular collapse will be  
37  
38 missing for any patients. Missing data will not be imputed for the primary or secondary  
39  
40 outcome. In adjusted analyses, missing data for covariates may be imputed using a  
41  
42 multiple imputation technique.  
43  
44  
45  
46  
47

### 48 *Corrections for Multiple Testing*

49  
50 We pre-specify a single primary analysis of a single primary outcome, and a  
51  
52 single secondary analysis with one outcome. All additional analyses are deemed  
53  
54 hypothesis-generating, and no corrections for multiple comparisons will be performed.  
55  
56  
57  
58  
59

### *Trial Status*

The Preventing cardiovascular collapse with Administration of fluid Resuscitation during Induction and Intubation (PREPARE II) trial is a pragmatic, prospective, multi-center, non-blinded randomized clinical trial comparing fluid bolus to no fluid bolus during tracheal intubation of critically ill adults. Patient enrolment began on February 1, 2019 and is expected to be completed in June, 2020.

### **Ethics and Dissemination**

#### *Informed Consent*

In current clinical practice, initiating an intravenous fluid bolus beginning prior to tracheal intubation and not administering an intravenous fluid bolus beginning prior to tracheal intubation are both common management approaches, with significant variation between providers<sup>18</sup>. All patients eligible for this trial would have either received or not received an intravenous fluid bolus for tracheal intubation as a part of their clinical care, regardless of participation in the trial. To be eligible for the trial, patients' treating clinicians must feel that initiation of a new fluid bolus for tracheal intubation is neither required nor contraindicated for the patient's optimal care. The protocol states that a fluid bolus can be given or withheld for patient safety at any time in the study, regardless of group assignment. For these reasons, the trial is felt to pose minimal incremental risk compared with the clinical care patients would receive outside of the trial.

1  
2  
3 Tracheal intubation of critically ill adults is commonly an urgent or emergent  
4 procedure for which obtaining informed consent for the clinical procedure or informed  
5 consent for research is impracticable.  
6  
7  
8  
9

10 This information was provided to either the central institutional review board at  
11 Vanderbilt University Medical Center or the local institutional review board at each trial  
12 site (see **Supplemental file 1, Item 2**), and the trial was approved with a waiver of  
13 informed consent.  
14  
15  
16  
17  
18  
19  
20

### 21 *Information for Patients and Families*

22 Information regarding the study is made available to patients and families  
23 through three mechanisms: (1) a patient and family notification sheet provided to each  
24 patient and family following enrolment informing the patient of his or her enrolment and  
25 describing the study, (2) a patient and family information sheet containing general  
26 information about the study and contact information for the research team displayed in  
27 at least three publicly-visible locations within the study unit, (3) a patient and family  
28 information sheet containing general study information and contact information for the  
29 research team provided to each patient and family at the time of admission to the study  
30 unit. The mechanism(s) of providing information to patients and families used by each  
31 study site was determined by local site investigators and local IRBs and is described in  
32 **Supplemental file 1, Item 2; Table S1**.  
33  
34  
35  
36  
37  
38  
39  
40  
41  
42  
43  
44  
45  
46  
47  
48  
49  
50

### 51 *Protocol Changes*

1  
2  
3 Any changes to the trial protocol will be recorded on ClinicalTrials.Gov as per  
4 SPIRIT guidelines. See **Supplemental file 1, Item 9** for more details.  
5  
6  
7  
8  
9

### 10 *Data Handling*

11  
12 For details of privacy and data handling, see **Supplemental file 1, Item 10**.  
13  
14  
15

### 16 *Dissemination Plan*

17  
18 Trial results will be submitted to a peer-reviewed journal for consideration of  
19 publication and will be presented at scientific conferences.  
20  
21  
22  
23  
24  
25

### 26 **Conclusion**

27  
28 We describe, before the conclusion of enrolment or data un-blinding, our trial  
29 design and approach to analyzing the data from a large, pragmatic, multicenter trial  
30 comparing fluid bolus administration versus no fluid bolus administration with regard to  
31 rate of cardiovascular collapse among critically ill adults undergoing tracheal intubation  
32 with positive pressure ventilation. This pre-specified framework will enhance the rigor  
33 and reproducibility of the final report and will allow readers to better judge the impact of  
34 our findings.  
35  
36  
37  
38  
39  
40  
41  
42  
43  
44  
45  
46

### 47 **Figure Legends**

48  
49  
50  
51 **Figure 1:** Timeline of tracheal intubation (TI), enrolment, study interventions, and  
52 primary/secondary outcome eligibility in an enrolled patient.  
53  
54  
55  
56  
57  
58  
59  
60

## # List of PREPARE II Investigators

Wake Forest School of Medicine— Kevin W. Gibbs, MD\*\*\*; Simanta Dutta, MD\*\*\*; Stephen P Peters MD, PhD\*; Muhammad Ali, MBBS\*; Rita N. Bakhru, MD, MS\*; Scott Bauer, ANP-BC\*; Christina R. Bellinger, MD\*; Amanda M. Brown, PA-C\*; Blair Brown, MD\*; Jerri Brown, ADN, RN\*; Caitlin Bumgarner, ACGNP\*; Wendy Butcher, RN, BSN\*; Megan Caudle, ACGNP\*; Arjun B. Chatterjee, MD\*; David J. Chodos, MD\*; Gerardo Corcino, RN, BSN\*; Nathan S. Cutler, MD\*; Travis L. Dotson, MD\*; Daniel C. Files, MD\*; Jonathan L Forbes, DO\*; John P. Gaillard, MD\*; Katherine A. Gershner, DO\*; Shannon Ginty, PA-C\*; Kiadrick R. Hood, RN, MSN, CMSRN\*; April Hazelwood, ADN, RN\*; Katherine Hendricks, FNP\*; Kelly Jacobus, PA-C\*; Jonathan T. Jaffe, MD\*; Stacy Kay, ACGNP\*; Chad A. Kloefkorn, MD\*; Jennifer Krall, MD\*; Margo T. Lannan, MD\*; Cornelia Lane, ACGNP\*; Cynthia Lanning, BSN, RN\*; Jessica Lyons, PA-C\*; William I. Mariencheck Jr., MD\*; Chad R. Marion, DO, PhD\*; Matthew A. Maslonka, MD\*; Sara McClintock, ACGNP\*; Nathaniel M. Meier, MD\*; Matthew C. Miles, MD, MEd\*; Peter J. Miller, MD\*; Sophia Mitchell, PA-C\*; Wendy C. Moore, MD\*; Katherine Moss, PA-C\*; Andrew M. Namen, MD\*; Dustin L. Norton, MD\*; Stella B. Ogake, MD\*; Jill A. Ohar, MD\*; Victor E. Ortega, MD, PhD\*; Jessica A. Palakshappa, MD, MS\*; Rodolfo M. Pascual, MD\*; Sandi Pascual, ANP-BC\*; Aaron Pickens, MD\*; Adam R Schertz, MD\*; Matt Strong, ADN, RN\*; Alexander O. Sy, MD\*; Braghadheeswar Thyagarajan MD\*; Amy Townsend, ACGNP\*; Russell Worthen, FNP-BC\*; Michael Wlodarski, PA-C\*; Charles Yarbrough, ADN, RN\*; Caroline York, PA-C\*; Vanderbilt University Medical Center— Jonathan D. Casey, MD, MSc\*\*\*; Janna S. Landsperger, MSN\*\*\*; Li Wang, MS\*\*\*; Christopher J. Lindsell PhD\*\*\*; Todd W. Rice, MD, MSc\*\*\*; Matthew W. Semler, MD, MSc\*\*\*; Wesley H. Self, MD, MPH\*\*; Bradley Lloyd, RRT-ACCS\*; Lahey Hospital and Medical Center— James Dargin, MD\*\*\*; Joanne Wozniak, PA-C\*\*\*; Susan Stempek, PA-C\*\*\*; Christopher Adler, PA-C\*; Ahmed Agameya, MD\*; Michael Colancecco, DO\*; Daniel Fitelson, MD\*; Joshua Giaccotto, MD\*; Gena Han, DO\*; Louise Kane, MD\*; Ezra Miller, MD\*; Timothy Noland, PA-C\*; Jaqueline Price, PA-C\*; Joseph Plourde, PA-C\*; Emily Adams, PA-C\*; Fraser Mackay, MD\*; Laura Mahoney, PA-C\*; Avignat Patel, MD\*; Michael Plourde, PA-C\*; Zena Saadeh, PA-C\*; Sara Shadchehr, DO\*; Sandeep Somalaraju, MD\*; Eleanor Summerhill, MD\*; Ryan Webster, MD\*; Jordan Winnicki, PA-C\*; Ekaterina Yavarovich, DO\*; University of Alabama at Birmingham Medical Center— Derek W. Russell, MD\*\*\*; Sarah Robison, MD\*\*\*; Sheetal Gandotra, MD\*\*; Swati Gulati, MBBS, MS\*\*; Anna Altz-Stamm RN, BSN, CCRN\*; Cristina Bardita, MD, PhD\* ; Mary Clay Boone RN, BSN\*; Joe W. Chiles III, MD\*; Kristina Collins RN, BSN\*; Abby Drescher RN, BSN\*; Kevin G. Dsouza, MD\*; Janna Dunn, RN, AND\*; Stacy Ejem, MD\*; Josh Gautney, MD\*; Nicole Harris, RN, ADN\*; Savannah Herder, RN, BSN\*; Tamer Hudali, MD, MPH\*; R. Chad Wade, MD\*; Rutwij Joshi, MBBS\*; Daniel Kelmenson, MD\*; Anne Merrill Mason RN, BSN\*; Scott R. Merriman, MD\*; Takudzwa Mkorombindo, MD\*; Megan Moore, RN, MSN\*; Jada Nowak, RN, BSN\*; Kate O'Connor, DO\*; David B. Page, MD\*; Sheylan D. Patel, MD\*; G. Bruno Pereira, MD, PhD\*; Lisa Sarratt RN, BSN\*; Tabitha Stewart RN, BSN\*; William S. Stigler, MD\*; Kadambari Vijaykumar, MBBS\*; Gina White RN, BSN\*; Micah R. Whitson, MD\*; Ochsner Health System New Orleans— Derek J. Vonderhaar, MD\*\*\*; Kevin M. Dischert MD\*\*; University of Washington Harborview Medical Center— Aaron M. Joffe, DO\*\*\*; Itay Bentov, MD, PhD\*\*\*; Christopher Barnes\*\*; Andrew M. Walters\*\*; Baylor Scott & White Medical Center— Shekhar Ghamande, MD\*\*\*; Heath D. White, DO, MS\*\*\*; Alejandro C. Arroliga, MD, MS\*\*; Tasnim Lat, DO\*\*; Oregon Health and Science University School of Medicine— Akram Khan, MD\*\*\*; Olivia F.



1  
2  
3 Krol, BS\*\*\*; Stephanie Nonas, MD\*\*; Milad K. Jouzestani\*\*; Raya Adi\*; Chandani  
4 Anandkat\*; Hanae Benchbani, MD\*; Matthew G. Drake, MD\*; Makrina N. Kamel, BS\*;  
5 Ramanpreet Randhawa, MD\*; Jessica L. Tsui, MD\*; Hennepin County Medical Center—  
6 Matthew E. Prekker, MD\*\*\*; Brian E. Driver, MD\*\*\*; University of Mississippi Medical  
7 Center— Joseph M. Brewer, DO\*\*\*; Louisiana State University School of Medicine—David R.  
8 Janz, MD, MSc\*\*\*  
9

10  
11 \*\*\*Denotes an author listed on the byline.

12 \*\*Denotes an author not listed on the byline due to space considerations.

13 \*Denotes a collaborator  
14

## 15 16 17 **Bibliography:**

- 18  
19  
20 1. Simpson GD, Ross MJ, McKeown DW, et al. Tracheal intubation in the critically ill: a multi-  
21 centre national study of practice and complications. *Br J Anaesth* 2012;108(5):792-9. doi:  
22 10.1093/bja/aer504  
23 2. Martin LD, Mhyre JM, Shanks AM, et al. 3,423 emergency tracheal intubations at a university  
24 hospital: airway outcomes and complications. *Anesthesiology* 2011;114(1):42-8. doi:  
25 10.1097/ALN.0b013e318201c415  
26 3. Leibowitz AB. Tracheal intubation in the intensive care unit: extremely hazardous even in the  
27 best of hands. *Crit Care Med* 2006;34(9):2497-8. doi:  
28 10.1097/01.CCM.0000235993.47514.8F  
29 4. Jaber S, Jung B, Corne P, et al. An intervention to decrease complications related to  
30 endotracheal intubation in the intensive care unit: a prospective, multiple-center study.  
31 *Intensive Care Med* 2010;36(2):248-55. doi: 10.1007/s00134-009-1717-8  
32 5. Green RS, Turgeon AF, McIntyre LA, et al. Postintubation hypotension in intensive care unit  
33 patients: A multicenter cohort study. *J Crit Care* 2015;30(5):1055-60. doi:  
34 10.1016/j.jcrc.2015.06.007  
35 6. Ferrada P, Manzano-Nunez R, Lopez-Castilla V, et al. Meta-Analysis of Post-Intubation  
36 Hypotension: A Plea to Consider Circulation First in Hypovolemic Patients. *Am Surg*  
37 2019;85(2):167-72.  
38 7. Perbet S, De Jong A, Delmas J, et al. Incidence of and risk factors for severe cardiovascular  
39 collapse after endotracheal intubation in the ICU: a multicenter observational study. *Crit*  
40 *Care* 2015;19:257. doi: 10.1186/s13054-015-0975-9  
41 8. Janz DR, Casey JD, Semler MW, et al. Effect of a fluid bolus on cardiovascular collapse  
42 among critically ill adults undergoing tracheal intubation (PrePARE): a randomised  
43 controlled trial. *Lancet Respir Med* 2019 doi: 10.1016/S2213-2600(19)30246-2  
44 9. Heffner AC, Swords DS, Nussbaum ML, et al. Predictors of the complication of  
45 postintubation hypotension during emergency airway management. *J Crit Care*  
46 2012;27(6):587-93. doi: 10.1016/j.jcrc.2012.04.022  
47 10. Higgs A, McGrath BA, Goddard C, et al. Guidelines for the management of tracheal  
48 intubation in critically ill adults. *Br J Anaesth* 2018;120(2):323-52. doi:  
49 10.1016/j.bja.2017.10.021  
50 11. Casey JD, Janz DR, Russell DW, et al. Bag-Mask Ventilation during Tracheal Intubation of  
51 Critically Ill Adults. *N Engl J Med* 2019;380(9):811-21. doi: 10.1056/NEJMoa1812405  
52  
53  
54  
55  
56  
57  
58  
59  
60



12. Baillard C, Prat G, Jung B, et al. Effect of preoxygenation using non-invasive ventilation before intubation on subsequent organ failures in hypoxaemic patients: a randomised clinical trial. *Br J Anaesth* 2018;120(2):361-67. doi: 10.1016/j.bja.2017.11.067 [published Online First: 2018/02/07]
13. Chan AW, Tetzlaff JM, Gotzsche PC, et al. SPIRIT 2013 explanation and elaboration: guidance for protocols of clinical trials. *BMJ* 2013;346:e7586. doi: 10.1136/bmj.e7586
14. Cormack RS, Lehane J. Difficult tracheal intubation in obstetrics. *Anaesthesia* 1984;39(11):1105-11.
15. Knaus WA, Draper EA, Wagner DP, et al. APACHE II: a severity of disease classification system. *Crit Care Med* 1985;13(10):818-29.
16. Jennett B, Teasdale G, Braakman R, et al. Predicting outcome in individual patients after severe head injury. *Lancet* 1976;1(7968):1031-4.
17. Cagney DN, Sul J, Huang RY, et al. The FDA NIH Biomarkers, EndpointS, and other Tools (BEST) resource in neuro-oncology. *Neuro Oncol* 2018;20(9):1162-72. doi: 10.1093/neuonc/nox242
18. Green RS, Fergusson DA, Turgeon AF, et al. Resuscitation Prior to Emergency Endotracheal Intubation: Results of a National Survey. *West J Emerg Med* 2016;17(5):542-8. doi: 10.5811/westjem.2016.6.30503

1  
2  
3  
4  
5  
6  
7  
8  
9  
10  
11  
12  
13  
14  
15  
16  
17  
18  
19  
20  
21  
22  
23  
24  
25  
26  
27  
28  
29  
30  
31  
32  
33  
34  
35  
36  
37  
38  
39  
40  
41

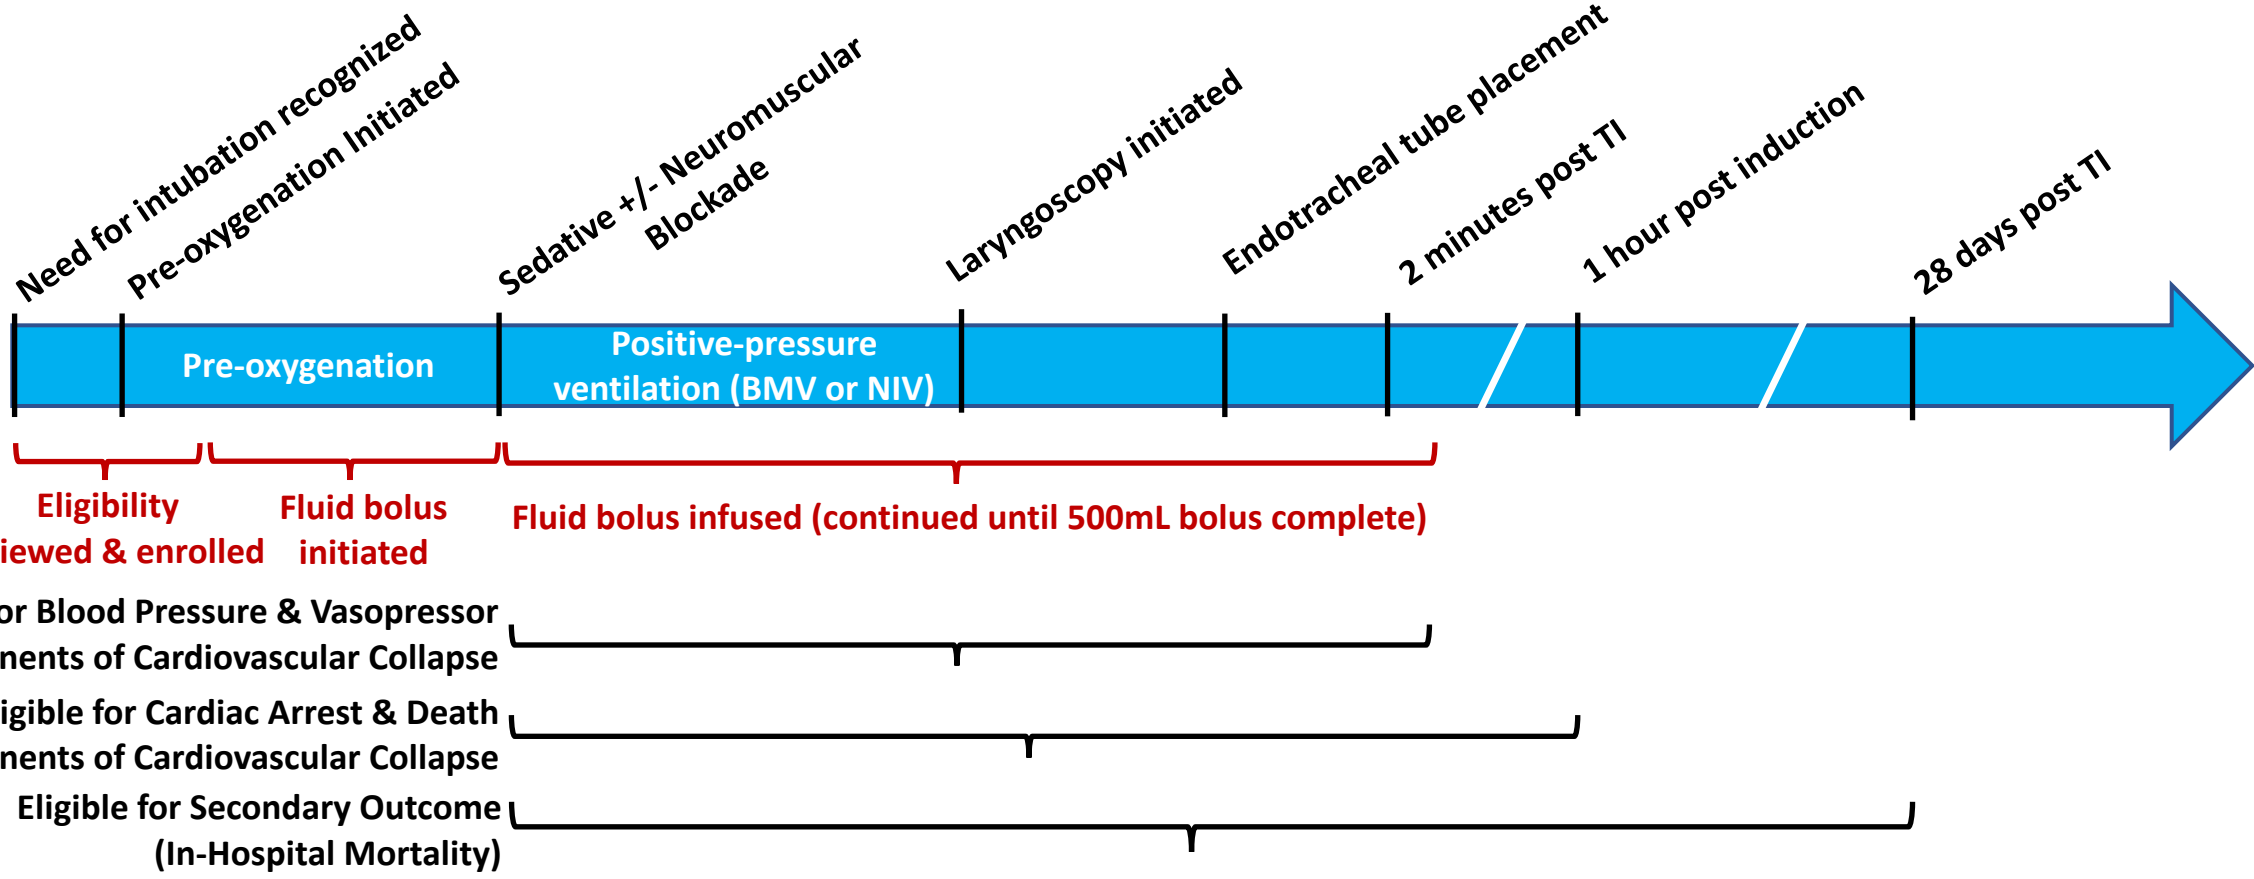

Figure 1

1  
2  
3 **Supplementary file to:**  
4  
5

6 **Protocol and statistical analysis plan for the PREventing cardiovascular collaPse**  
7 **with Administration of fluid REsuscitation during Induction and Intubation**  
8 **(PREPARE II) randomized clinical trial**  
9  
10  
11  
12  
13  
14  
15  
16  
17  
18  
19  
20  
21  
22  
23  
24  
25  
26  
27  
28  
29  
30  
31  
32  
33  
34  
35  
36  
37  
38  
39  
40  
41  
42  
43  
44  
45  
46  
47  
48  
49  
50  
51  
52  
53  
54  
55  
56  
57

For peer review only

## Table of Contents

1. SPIRIT 2013 Checklist
2. Site Characteristics
3. Randomization Assignment Sheets
4. Data Collection
5. Definition of 28-day In-hospital Mortality
6. Definition of Ventilator Free Days (VFDs)
7. Definition of ICU-Free Days (ICU-FDs)
8. Definition of “days from enrolment to in-hospital death”
9. Plan for communication of protocol changes
10. Patient Privacy and Data Storage

## 1. SPIRIT 2013 Checklist

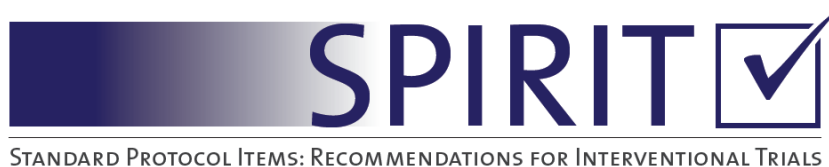

SPIRIT 2013 Checklist: Recommended items to address in a clinical trial protocol and related documents\*

| Section/item                      | Item No | Description                                                                                                                                                                                                                                                                              | Addressed on page number |
|-----------------------------------|---------|------------------------------------------------------------------------------------------------------------------------------------------------------------------------------------------------------------------------------------------------------------------------------------------|--------------------------|
| <b>Administrative information</b> |         |                                                                                                                                                                                                                                                                                          |                          |
| Title                             | 1       | Descriptive title identifying the study design, population, interventions, and, if applicable, trial acronym                                                                                                                                                                             | <u>1,10-12</u>           |
| Trial registration                | 2a      | Trial identifier and registry name. If not yet registered, name of intended registry                                                                                                                                                                                                     | <u>5</u>                 |
|                                   | 2b      | All items from the World Health Organization Trial Registration Data Set                                                                                                                                                                                                                 | <u>1-5,</u>              |
| Protocol version                  | 3       | Date and version identifier                                                                                                                                                                                                                                                              | <u>N/A</u>               |
| Funding                           | 4       | Sources and types of financial, material, and other support                                                                                                                                                                                                                              | <u>2</u>                 |
| Roles and responsibilities        | 5a      | Names, affiliations, and roles of protocol contributors                                                                                                                                                                                                                                  | <u>1,2</u>               |
|                                   | 5b      | Name and contact information for the trial sponsor                                                                                                                                                                                                                                       | <u>2</u>                 |
|                                   | 5c      | Role of study sponsor and funders, if any, in study design; collection, management, analysis, and interpretation of data; writing of the report; and the decision to submit the report for publication, including whether they will have ultimate authority over any of these activities | <u>2</u>                 |

|    |                                                                                                                                                                                                                                                                  |                       |
|----|------------------------------------------------------------------------------------------------------------------------------------------------------------------------------------------------------------------------------------------------------------------|-----------------------|
| 5d | Composition, roles, and responsibilities of the coordinating centre, steering committee, endpoint adjudication committee, data management team, and other individuals or groups overseeing the trial, if applicable (see Item 21a for data monitoring committee) | <u>1,2, 9,10, 24,</u> |
|----|------------------------------------------------------------------------------------------------------------------------------------------------------------------------------------------------------------------------------------------------------------------|-----------------------|

## Introduction

|                          |    |                                                                                                                                                                                                           |                |
|--------------------------|----|-----------------------------------------------------------------------------------------------------------------------------------------------------------------------------------------------------------|----------------|
| Background and rationale | 6a | Description of research question and justification for undertaking the trial, including summary of relevant studies (published and unpublished) examining benefits and harms for each intervention        | <u>7,8, 13</u> |
|                          | 6b | Explanation for choice of comparators                                                                                                                                                                     | <u>7,8</u>     |
| Objectives               | 7  | Specific objectives or hypotheses                                                                                                                                                                         | <u>8</u>       |
| Trial design             | 8  | Description of trial design including type of trial (eg, parallel group, crossover, factorial, single group), allocation ratio, and framework (eg, superiority, equivalence, noninferiority, exploratory) | <u>9</u>       |

## Methods: Participants, interventions, and outcomes

|                      |     |                                                                                                                                                                                                |               |
|----------------------|-----|------------------------------------------------------------------------------------------------------------------------------------------------------------------------------------------------|---------------|
| Study setting        | 9   | Description of study settings (eg, community clinic, academic hospital) and list of countries where data will be collected. Reference to where list of study sites can be obtained             | <u>9,10</u>   |
| Eligibility criteria | 10  | Inclusion and exclusion criteria for participants. If applicable, eligibility criteria for study centers and individuals who will perform the interventions (eg, surgeons, psychotherapists)   | <u>10</u>     |
| Interventions        | 11a | Interventions for each group with sufficient detail to allow replication, including how and when they will be administered                                                                     | <u>10-12,</u> |
|                      | 11b | Criteria for discontinuing or modifying allocated interventions for a given trial participant (eg, drug dose change in response to harms, participant request, or improving/worsening disease) | <u>12,13</u>  |
|                      | 11c | Strategies to improve adherence to intervention protocols, and any procedures for monitoring adherence (eg, drug tablet return, laboratory tests)                                              | <u>12-14</u>  |

|                      |     |                                                                                                                                                                                                                                                                                                                                                                                |                          |
|----------------------|-----|--------------------------------------------------------------------------------------------------------------------------------------------------------------------------------------------------------------------------------------------------------------------------------------------------------------------------------------------------------------------------------|--------------------------|
|                      | 11d | Relevant concomitant care and interventions that are permitted or prohibited during the trial                                                                                                                                                                                                                                                                                  | <u>12-14</u>             |
| Outcomes             | 12  | Primary, secondary, and other outcomes, including the specific measurement variable (eg, systolic blood pressure), analysis metric (eg, change from baseline, final value, time to event), method of aggregation (eg, median, proportion), and time point for each outcome. Explanation of the clinical relevance of chosen efficacy and harm outcomes is strongly recommended | <u>13-15</u>             |
| Participant timeline | 13  | Time schedule of enrolment, interventions (including any run-ins and washouts), assessments, and visits for participants. A schematic diagram is highly recommended (see Figure)                                                                                                                                                                                               | <u>Figure 1, Table 1</u> |
| Sample size          | 14  | Estimated number of participants needed to achieve study objectives and how it was determined, including clinical and statistical assumptions supporting any sample size calculations                                                                                                                                                                                          | <u>15-17</u>             |
| Recruitment          | 15  | Strategies for achieving adequate participant enrollment to reach target sample size                                                                                                                                                                                                                                                                                           | <u>10-13</u>             |

### Methods: Assignment of interventions (for controlled trials)

#### Allocation:

|                                  |     |                                                                                                                                                                                                                                                                                                                                                             |                       |
|----------------------------------|-----|-------------------------------------------------------------------------------------------------------------------------------------------------------------------------------------------------------------------------------------------------------------------------------------------------------------------------------------------------------------|-----------------------|
| Sequence generation              | 16a | Method of generating the allocation sequence (eg, computer-generated random numbers), and list of any factors for stratification. To reduce predictability of a random sequence, details of any planned restriction (e.g., blocking) should be provided in a separate document that is unavailable to those who enroll participants or assign interventions | <u>10</u>             |
| Allocation concealment mechanism | 16b | Mechanism of implementing the allocation sequence (e.g., central telephone; sequentially numbered, opaque, sealed envelopes), describing any steps to conceal the sequence until interventions are assigned                                                                                                                                                 | <u>11,12, Fig. S1</u> |
| Implementation                   | 16c | Who will generate the allocation sequence, who will enroll participants, and who will assign participants to interventions                                                                                                                                                                                                                                  | <u>11-13</u>          |

|                                 |                       |     |                                                                                                                                                      |            |
|---------------------------------|-----------------------|-----|------------------------------------------------------------------------------------------------------------------------------------------------------|------------|
| 1<br>2<br>3<br>4<br>5<br>6<br>7 | Blinding<br>(masking) | 17a | Who will be blinded after assignment to interventions (eg, trial participants, care providers, outcome assessors, data analysts), and how            | <u>10</u>  |
| 8<br>9<br>10<br>11<br>12<br>13  |                       | 17b | If blinded, circumstances under which unblinding is permissible, and procedure for revealing a participant's allocated intervention during the trial | <u>N/A</u> |

#### Methods: Data collection, management, and analysis

|                                                                      |                               |     |                                                                                                                                                                                                                                                                                                                                                                                                              |                                         |
|----------------------------------------------------------------------|-------------------------------|-----|--------------------------------------------------------------------------------------------------------------------------------------------------------------------------------------------------------------------------------------------------------------------------------------------------------------------------------------------------------------------------------------------------------------|-----------------------------------------|
| 14<br>15<br>16<br>17<br>18<br>19<br>20<br>21<br>22<br>23<br>24<br>25 | Data<br>collection<br>methods | 18a | Plans for assessment and collection of outcome, baseline, and other trial data, including any related processes to promote data quality (eg, duplicate measurements, training of assessors) and a description of study instruments (eg, questionnaires, laboratory tests) along with their reliability and validity, if known. Reference to where data collection forms can be found, if not in the protocol | <u>12-22,<br/>Supplement 15-<br/>17</u> |
| 26<br>27<br>28<br>29<br>30                                           |                               | 18b | Plans to promote participant retention and complete follow-up, including list of any outcome data to be collected for participants who discontinue or deviate from intervention protocols                                                                                                                                                                                                                    | <u>12-14,<br/>Supplement<br/>14</u>     |
| 31<br>32<br>33<br>34<br>35<br>36<br>37                               | Data<br>managemen<br>t        | 19  | Plans for data entry, coding, security, and storage, including any related processes to promote data quality (eg, double data entry; range checks for data values). Reference to where details of data management procedures can be found, if not in the protocol                                                                                                                                            | <u>Supplement 14</u>                    |
| 38<br>39<br>40<br>41<br>42<br>43<br>44<br>45<br>46                   | Statistical<br>methods        | 20a | Statistical methods for analyzing primary and secondary outcomes. Reference to where other details of the statistical analysis plan can be found, if not in the protocol                                                                                                                                                                                                                                     | <u>18, 22</u>                           |
| 47<br>48<br>49<br>50<br>51                                           |                               | 20b | Methods for any additional analyses (eg, subgroup and adjusted analyses)                                                                                                                                                                                                                                                                                                                                     | <u>18-23</u>                            |
| 52<br>53<br>54<br>55<br>56<br>57                                     |                               | 20c | Definition of analysis population relating to protocol non-adherence (eg, as randomized analysis), and any statistical methods to handle missing data (eg, multiple imputation)                                                                                                                                                                                                                              | <u>18, 22</u>                           |

#### Methods: Monitoring



|    |                                 |     |                                                                                                                                                                                                                                                                                                                                       |
|----|---------------------------------|-----|---------------------------------------------------------------------------------------------------------------------------------------------------------------------------------------------------------------------------------------------------------------------------------------------------------------------------------------|
| 1  |                                 |     |                                                                                                                                                                                                                                                                                                                                       |
| 2  |                                 |     |                                                                                                                                                                                                                                                                                                                                       |
| 3  |                                 |     |                                                                                                                                                                                                                                                                                                                                       |
| 4  | Data monitoring                 | 21a | Composition of data monitoring committee (DMC); summary of its role and reporting structure; statement of whether it is independent from the sponsor and competing interests; and reference to where further details about its charter can be found, if not in the protocol. Alternatively, an explanation of why a DMC is not needed |
| 5  |                                 |     | <u>16, 17</u>                                                                                                                                                                                                                                                                                                                         |
| 6  |                                 |     |                                                                                                                                                                                                                                                                                                                                       |
| 7  |                                 |     |                                                                                                                                                                                                                                                                                                                                       |
| 8  |                                 |     |                                                                                                                                                                                                                                                                                                                                       |
| 9  |                                 |     |                                                                                                                                                                                                                                                                                                                                       |
| 10 |                                 |     |                                                                                                                                                                                                                                                                                                                                       |
| 11 |                                 |     |                                                                                                                                                                                                                                                                                                                                       |
| 12 |                                 | 21b | Description of any interim analyses and stopping guidelines, including who will have access to these interim results and make the final decision to terminate the trial                                                                                                                                                               |
| 13 |                                 |     | <u>16,17</u>                                                                                                                                                                                                                                                                                                                          |
| 14 |                                 |     |                                                                                                                                                                                                                                                                                                                                       |
| 15 |                                 |     |                                                                                                                                                                                                                                                                                                                                       |
| 16 | Harms                           | 22  | Plans for collecting, assessing, reporting, and managing solicited and spontaneously reported adverse events and other unintended effects of trial interventions or trial conduct                                                                                                                                                     |
| 17 |                                 |     | <u>16, 17</u>                                                                                                                                                                                                                                                                                                                         |
| 18 |                                 |     |                                                                                                                                                                                                                                                                                                                                       |
| 19 |                                 |     |                                                                                                                                                                                                                                                                                                                                       |
| 20 |                                 |     |                                                                                                                                                                                                                                                                                                                                       |
| 21 | Auditing                        | 23  | Frequency and procedures for auditing trial conduct, if any, and whether the process will be independent from investigators and the sponsor                                                                                                                                                                                           |
| 22 |                                 |     | <u>16,17</u>                                                                                                                                                                                                                                                                                                                          |
| 23 |                                 |     |                                                                                                                                                                                                                                                                                                                                       |
| 24 |                                 |     |                                                                                                                                                                                                                                                                                                                                       |
| 25 |                                 |     |                                                                                                                                                                                                                                                                                                                                       |
| 26 |                                 |     |                                                                                                                                                                                                                                                                                                                                       |
| 27 | <b>Ethics and dissemination</b> |     |                                                                                                                                                                                                                                                                                                                                       |
| 28 | Research ethics approval        | 24  | Plans for seeking research ethics committee/institutional review board (REC/IRB) approval                                                                                                                                                                                                                                             |
| 29 |                                 |     | <u>24</u>                                                                                                                                                                                                                                                                                                                             |
| 30 |                                 |     |                                                                                                                                                                                                                                                                                                                                       |
| 31 |                                 |     |                                                                                                                                                                                                                                                                                                                                       |
| 32 | Protocol amendments             | 25  | Plans for communicating important protocol modifications (eg, changes to eligibility criteria, outcomes, analyses) to relevant parties (eg, investigators, REC/IRBs, trial participants, trial registries, journals, regulators)                                                                                                      |
| 33 |                                 |     | <u>25,</u>                                                                                                                                                                                                                                                                                                                            |
| 34 |                                 |     | <u>Supplement 13,</u>                                                                                                                                                                                                                                                                                                                 |
| 35 |                                 |     | <u>14</u>                                                                                                                                                                                                                                                                                                                             |
| 36 |                                 |     |                                                                                                                                                                                                                                                                                                                                       |
| 37 |                                 |     |                                                                                                                                                                                                                                                                                                                                       |
| 38 | Consent or assent               | 26a | Who will obtain informed consent or assent from potential trial participants or authorized surrogates, and how (see Item 32)                                                                                                                                                                                                          |
| 39 |                                 |     | <u>23,24</u>                                                                                                                                                                                                                                                                                                                          |
| 40 |                                 |     |                                                                                                                                                                                                                                                                                                                                       |
| 41 |                                 |     |                                                                                                                                                                                                                                                                                                                                       |
| 42 |                                 |     |                                                                                                                                                                                                                                                                                                                                       |
| 43 |                                 | 26b | Additional consent provisions for collection and use of participant data and biological specimens in ancillary studies, if applicable                                                                                                                                                                                                 |
| 44 |                                 |     | <u>N/A</u>                                                                                                                                                                                                                                                                                                                            |
| 45 |                                 |     |                                                                                                                                                                                                                                                                                                                                       |
| 46 |                                 |     |                                                                                                                                                                                                                                                                                                                                       |
| 47 |                                 |     |                                                                                                                                                                                                                                                                                                                                       |
| 48 | Confidentiality                 | 27  | How personal information about potential and enrolled participants will be collected, shared, and maintained in order to protect confidentiality before, during, and after the trial                                                                                                                                                  |
| 49 |                                 |     | <u>Supplement 14</u>                                                                                                                                                                                                                                                                                                                  |
| 50 |                                 |     |                                                                                                                                                                                                                                                                                                                                       |
| 51 |                                 |     |                                                                                                                                                                                                                                                                                                                                       |
| 52 |                                 |     |                                                                                                                                                                                                                                                                                                                                       |
| 53 |                                 |     |                                                                                                                                                                                                                                                                                                                                       |
| 54 | Declaration of interests        | 28  | Financial and other competing interests for principal investigators for the overall trial and each study site                                                                                                                                                                                                                         |
| 55 |                                 |     | <u>2</u>                                                                                                                                                                                                                                                                                                                              |
| 56 |                                 |     |                                                                                                                                                                                                                                                                                                                                       |
| 57 |                                 |     |                                                                                                                                                                                                                                                                                                                                       |
| 58 |                                 |     |                                                                                                                                                                                                                                                                                                                                       |
| 59 |                                 |     |                                                                                                                                                                                                                                                                                                                                       |
| 60 |                                 |     |                                                                                                                                                                                                                                                                                                                                       |

|    |                               |     |                                                                                                                                                                                                                                                                                       |                                              |
|----|-------------------------------|-----|---------------------------------------------------------------------------------------------------------------------------------------------------------------------------------------------------------------------------------------------------------------------------------------|----------------------------------------------|
| 1  |                               |     |                                                                                                                                                                                                                                                                                       |                                              |
| 2  |                               |     |                                                                                                                                                                                                                                                                                       |                                              |
| 3  |                               |     |                                                                                                                                                                                                                                                                                       |                                              |
| 4  | Access to data                | 29  | Statement of who will have access to the final trial dataset, and disclosure of contractual agreements that limit such access for investigators                                                                                                                                       | <u>Supplement 14</u>                         |
| 5  |                               |     |                                                                                                                                                                                                                                                                                       |                                              |
| 6  |                               |     |                                                                                                                                                                                                                                                                                       |                                              |
| 7  |                               |     |                                                                                                                                                                                                                                                                                       |                                              |
| 8  | Ancillary and post-trial care | 30  | Provisions, if any, for ancillary and post-trial care, and for compensation to those who suffer harm from trial participation                                                                                                                                                         | <u>N/A</u>                                   |
| 9  |                               |     |                                                                                                                                                                                                                                                                                       |                                              |
| 10 |                               |     |                                                                                                                                                                                                                                                                                       |                                              |
| 11 |                               |     |                                                                                                                                                                                                                                                                                       |                                              |
| 12 |                               |     |                                                                                                                                                                                                                                                                                       |                                              |
| 13 | Dissemination policy          | 31a | Plans for investigators and sponsor to communicate trial results to participants, healthcare professionals, the public, and other relevant groups (e.g., via publication, reporting in results databases, or other data sharing arrangements), including any publication restrictions | <u>5,9, 25</u>                               |
| 14 |                               |     |                                                                                                                                                                                                                                                                                       |                                              |
| 15 |                               |     |                                                                                                                                                                                                                                                                                       |                                              |
| 16 |                               |     |                                                                                                                                                                                                                                                                                       |                                              |
| 17 |                               |     |                                                                                                                                                                                                                                                                                       |                                              |
| 18 |                               |     |                                                                                                                                                                                                                                                                                       |                                              |
| 19 |                               |     |                                                                                                                                                                                                                                                                                       |                                              |
| 20 |                               | 31b | Authorship eligibility guidelines and any intended use of professional writers                                                                                                                                                                                                        | <u>1,2,</u>                                  |
| 21 |                               |     |                                                                                                                                                                                                                                                                                       |                                              |
| 22 |                               |     |                                                                                                                                                                                                                                                                                       |                                              |
| 23 |                               |     |                                                                                                                                                                                                                                                                                       |                                              |
| 24 |                               | 31c | Plans, if any, for granting public access to the full protocol, participant-level dataset, and statistical code                                                                                                                                                                       | <u>25,</u><br><u>Supplement</u><br><u>14</u> |
| 25 |                               |     |                                                                                                                                                                                                                                                                                       |                                              |
| 26 |                               |     |                                                                                                                                                                                                                                                                                       |                                              |
| 27 |                               |     |                                                                                                                                                                                                                                                                                       |                                              |
| 28 |                               |     |                                                                                                                                                                                                                                                                                       |                                              |
| 29 |                               |     |                                                                                                                                                                                                                                                                                       |                                              |
| 30 | <b>Appendices</b>             |     |                                                                                                                                                                                                                                                                                       |                                              |
| 31 | Informed consent materials    | 32  | Model consent form and other related documentation given to participants and authorized surrogates                                                                                                                                                                                    | <u>N/A</u>                                   |
| 32 |                               |     |                                                                                                                                                                                                                                                                                       |                                              |
| 33 |                               |     |                                                                                                                                                                                                                                                                                       |                                              |
| 34 |                               |     |                                                                                                                                                                                                                                                                                       |                                              |
| 35 | Biological specimens          | 33  | Plans for collection, laboratory evaluation, and storage of biological specimens for genetic or molecular analysis in the current trial and for future use in ancillary studies, if applicable                                                                                        | <u>N/A</u>                                   |
| 36 |                               |     |                                                                                                                                                                                                                                                                                       |                                              |
| 37 |                               |     |                                                                                                                                                                                                                                                                                       |                                              |
| 38 |                               |     |                                                                                                                                                                                                                                                                                       |                                              |
| 39 |                               |     |                                                                                                                                                                                                                                                                                       |                                              |

---

\*It is strongly recommended that this checklist be read in conjunction with the SPIRIT 2013 Explanation & Elaboration for important clarification on the items. Amendments to the protocol should be tracked and dated. The SPIRIT checklist is copyrighted by the SPIRIT Group under the Creative Commons "[Attribution-NonCommercial-NoDerivs 3.0 Unported](https://creativecommons.org/licenses/by-nc-nd/3.0/)" license.

## 2. Site Characteristics:

**Table S1**

|                                      | VUMC MICU          | LSU UMCNO MICU     | Ochsner MICU      | UW Harborview MICU  | UW Harborview NICU                  | UW Harborview TICU | Lahey MICU                  |
|--------------------------------------|--------------------|--------------------|-------------------|---------------------|-------------------------------------|--------------------|-----------------------------|
| <b>Number of Beds</b>                | 35                 | 20                 | 33                | 17                  | 30                                  | 24                 | 20                          |
| <b>Patient Notification Strategy</b> | Information Sheet  | Notification Sheet | Information Sheet | Information Sheet   | Information Sheet                   | Information Sheet  | Admission Information Sheet |
| <b>IRB Process</b>                   | Central*           | Central            | Central           | Central             | Central                             | Central            | Local                       |
|                                      | UAB MICU           | WFU MC MICU        | BSW Hospital MICU | OHSU MC MICU        | Hennepin MICU                       | UMMC MICU          |                             |
| <b>Number of Beds</b>                | 24                 | 42                 | 70                | 16                  | 28                                  | 20                 |                             |
| <b>Patient Notification Strategy</b> | Notification Sheet | Information Sheet  | Information Sheet | Notification Sheets | Notification and Information Sheets | Notification Sheet |                             |
| <b>IRB Oversight</b>                 | Central            | Central            | Local             | Central             | Central                             | Central            |                             |

VUMC is Vanderbilt University Medical Center in Nashville, TN; LSU is Louisiana State University Medical Center New Orleans, in New Orleans, LA; Ochsner is Ochsner Medical Center, in New Orleans, LA; UAB is University of Alabama at Birmingham in Birmingham, AL; UW is University of Washington Harborview Medical Center in Seattle, WA; Lahey is Lahey Hospital and Medical Center in Burlington, MA; WFU is Wake Forest University Medical Center in Winston-Salem, NC; BSW is Baylor, Scott & White Medical Center in Temple, TX; OHSU is Oregon Health Sciences University Medical Center in Portland, OR; Hennepin is Hennepin County Medical Center in Minneapolis, MN; UMMC is University of Mississippi Medical Center, in Jackson, MS; MICU is medical intensive care unit; NICU is neurological intensive care unit; TICU is trauma intensive care unit; IRB is institutional review board. "Notification sheet" is a patient and family notification packet provided to each patient and family following enrolment informing the patient of his or her enrolment and describing the study. "Information Sheet" is a patient and family information sheet containing general information about the study and contact information for the research team displayed in at least three publicly-visible locations within the study unit. "Admission Information Sheet" is a patient and family information sheet containing general study information and contact information for the research team provided to each patient and family on admission as part of a packet of materials provided at the time of admission to the study unit. \*The Vanderbilt IRB served as central IRB for sites utilizing a central IRB process.

## 3. Randomization Assignment Forms

1  
2  
3  
4  
5  
6  
7  
8  
9  
10  
11  
12  
13  
14  
15  
16  
17  
18  
19  
20  
21  
22  
23  
24  
25  
26  
27  
28  
29  
30  
31  
32  
33  
34  
35  
36  
37  
38  
39  
40  
41  
42  
43  
44  
45  
46  
47  
48  
49  
50

**A.**

## NO Fluid Bolus

**Do NOT start a new fluid bolus PRIOR to induction (pushing meds)**

OK to continue any IV fluids already running or ordered

OK to give IV fluids for treatment of cardiovascular collapse  
(SBP < 65, new pressor requirement, or cardiac arrest)

**B.**

## Fluid Bolus

**1** Obtain 500 ml of crystalloid & gravity IV tubing



**2** Hang fluid from top of IV pole, don't use IV pump



**3** Start infusion to gravity ASAP  
Any IV or IO + squeeze fluid bag



**4** Begin procedure whenever ready  
(don't need to wait for fluid to finish)



**Complete 500 mL infusion**

**Figure S1:** Randomization assignment sheets for subjects randomized to NO Fluid Bolus (A.), and Fluid Bolus (B.) groups.

#### 4. Data Collection:

A trained, independent observer not involved in the performance of the procedure collects data for key peri-procedural outcomes including: whether the patient was already receiving an intravenous fluid infusion at the time of enrolment, whether a new fluid bolus was started between randomization and induction, the volume of new fluid bolus infused from randomization to induction, the administration of new or increased vasopressors prior to or with induction, systolic blood pressure and oxygen saturation at the time of induction, the lowest arterial oxygen saturation and systolic blood pressure from induction to two minutes after tracheal intubation, the administration of a new fluid bolus between induction and two minutes after tracheal intubation, the administration of a new or increased dose of any vasopressor between induction and two minutes after tracheal intubation, the total volume of new fluid bolus infused between induction and two minutes after tracheal intubation, and the number of attempts at tracheal intubation.

Immediately following the procedure, the operator records the following information: sedative choice and dose, subjective difficulty of intubation, modality of pre-oxygenation, modality of oxygenation and ventilation between induction and laryngoscopy, laryngoscopy device used for first attempt, whether video or direct laryngoscopy was used on the first attempt, Cormack-Lehane grade of glottic view on the first attempt<sup>14</sup>, difficult airway characteristics present (cervical spine immobilization collar, body fluid obscuring the operator's view of the glottis, or facial trauma), use of a bougie or endotracheal tube with stylet on the first attempt, use of rescue equipment (bougie, stylet, video laryngoscope, direct laryngoscope, laryngeal mask airway, bronchoscope, second proceduralist), and procedural complications (cardiac arrest, bradycardia, esophageal intubation, airway trauma, or witnessed aspiration). Operators also report their specialty and number of previous intubation procedures completed.

1  
2  
3 Study personnel also collect data on baseline characteristics, pre- and post-intubation  
4 management, and clinical outcomes from the medical record. The following information is  
5 collected from the medical record:  
6  
7  
8  
9

10 Baseline: Age, gender, height, weight, race, ethnicity, Acute Physiology and Chronic  
11 Health Evaluation (APACHE) II score<sup>15</sup>, active medical problems at the time of intubation, active  
12 and chronic comorbidities complicating intubation, indication for intubation, most recent pre-  
13 procedural Glasgow Coma Score<sup>16</sup>, non-invasive ventilator and high flow nasal cannula use in  
14 the hour prior to starting pre-oxygenation, vasopressor use in the hour preceding enrolment,  
15 presence of sepsis (defined as life-threatening organ dysfunction caused by a dysregulated host  
16 response to infection) or septic shock (defined as presence of sepsis plus vasopressor  
17 requirement to maintain a mean arterial pressure of 65mmHg or greater and serum lactate  
18 >2mmol/L in the absence of hypovolemia) at the time of enrolment, the highest fraction of  
19 inspired oxygen delivered (FiO<sub>2</sub>) in the hour preceding enrolment, and whether or not the  
20 intubation was a reintubation (defined as patient who had been extubated from invasive  
21 mechanical ventilation within the prior 72 hours).  
22  
23  
24  
25  
26  
27  
28  
29  
30  
31  
32  
33  
34  
35

36 Peri-procedural: type and dose of neuromuscular blocker; laryngoscope used, shape  
37 and size of the laryngoscope blade used for first attempt; total number of attempts; subjective  
38 assessment of the difficulty of tracheal intubation reported by the operator (easy, moderate,  
39 difficult, unknown);  
40  
41  
42  
43  
44

45 0-24 hours: Cardiac arrest within 1 hour of intubation; death within 1 hour of intubation;  
46 systolic blood pressure, oxygen saturation, FiO<sub>2</sub>, and positive end expiratory pressure delivered  
47 at 24 hours following intubation.  
48  
49  
50  
51  
52  
53  
54  
55  
56  
57

1  
2  
3 In-Hospital Outcomes: 28 day in-hospital mortality, days from enrolment to death,  
4 ventilator-free days, and ICU-free days – all censored at hospital discharge. See  
5 **Supplementary file 1, Items 5-8** below for definitions of these terms.  
6  
7  
8  
9

## 10 11 12 13 **5. Definition of 28-day in-hospital mortality**

14  
15  
16 28-day in-hospital mortality is defined as death from any cause between  
17 enrolment and either 28 days from enrolment or discharge from the hospital, whichever  
18 comes first.  
19  
20  
21  
22

## 23 **6. Definition of Ventilator Free Days**

24  
25  
26  
27 Ventilator-free days (VFDs) are defined as the number of days alive and free of  
28 invasive mechanical ventilation, from the patient's final extubation to 28 days after  
29 enrolment. If a patient returns to invasive mechanical ventilation and is subsequently  
30 liberated from invasive mechanical ventilation prior to day 28, the number of VFDs will  
31 be counted from the date of the final liberation from invasive mechanical ventilation  
32 before day 28. If the patient is receiving invasive mechanical ventilation at day 28 or  
33 dies prior to day 28, the number of VFDs will be counted as 0. If a patient is discharged  
34 while receiving assisted ventilation, the number of VFDs will be counted as 0. VFDs are  
35 counted as 0 in any patients who die before day 28. All data are censored at hospital  
36 discharge or 28 days, whichever occurs first (i.e., any liberation from invasive  
37 mechanical ventilation after a hospital discharge or after day 28 does not affect VFDs).  
38  
39  
40  
41  
42  
43  
44  
45  
46  
47  
48  
49  
50  
51  
52  
53  
54

## 55 **7. Definition of ICU-Free Days (ICUFDs)**

1  
2  
3  
4  
5  
6 ICU-FDs are defined as the number of days alive and not admitted to an ICU  
7  
8 service, from the patient's final discharge from the ICU service to 28 days after  
9  
10 enrolment. If a patient is not discharged from the ICU service by day 28, the number of  
11  
12 ICU-FDs will be counted as 0. If a patient is discharged but later admitted again to an  
13  
14 ICU service but then is subsequently discharged prior to day 28, ICU-FDs are counted  
15  
16 as the number of days from the date of the final ICU discharge to day 28. ICU-FDs are  
17  
18 counted as 0 in any patients who die before day 28. All data are censored at hospital  
19  
20 discharge or 28 days, whichever comes first (i.e., any readmission to an ICU service  
21  
22 after day 28 or after a hospital discharge does not affect VFDs).  
23  
24  
25  
26  
27  
28  
29

### 30 **8. Definition of "days from enrolment to in-hospital death"**

31  
32 For patients who die prior to hospital discharge, the number of days from  
33  
34 enrolment to in-hospital death will be calculated as the number of midnights crossed  
35  
36 from the day of enrolment until the day of death. For example, a patient who died on the  
37  
38 day of enrolment would have a value for days from extubation to death of "0".  
39  
40  
41  
42  
43

### 44 **9. Plan for communication of protocol changes**

45  
46 Any changes to the trial protocol (e.g., changes to eligibility criteria, outcomes,  
47  
48 analyses) will be reflected in a new version of the full trial protocol, tracked with the date  
49  
50 of the update and the version number of the trial protocol. A list summarizing the  
51  
52 changes made with each protocol revision will be included at the end of each protocol.  
53  
54 The updated protocol will be submitted to the relevant IRBs for tracking and approval  
55  
56  
57



1  
2  
3 prior to implementation of each protocol change. At the time of publication, the original  
4 trial protocol and the final trial protocol, including the summary of changes made with  
5 each protocol change, will be provided in the supplementary material for publication.  
6  
7  
8  
9  
10

## 11 12 13 **10. Patient Privacy and Data Storage**

14  
15  
16 At no time during the course of this study, its analysis, or its publication, will patient  
17 identities be revealed in any manner. The minimum necessary data containing patient  
18 or provider identities or other private healthcare information (PHI) is collected. All  
19 subjects are assigned a unique study ID number for tracking. Data collected from the  
20 medical record is entered into the secure online database REDCap. The PHI required to  
21 accurately collect clinical and outcomes data is available only to investigators at the site  
22 at which the subject is enrolled. All data available to the coordinating center and  
23 investigators at other sites are completely de-identified and contain no PHI. Hard copies  
24 of the data collection sheet completed at the time of the airway management event are  
25 stored in a locked room until. The de-identified dataset housed in REDCap will be  
26 accessed by the coordinating center for analyzing and reporting the results of this trial.  
27 All data will be maintained in the secure online database REDCap until the time of study  
28 publication. After publication, all PHI at local centers will be expunged and only the de-  
29 identified version of the database will be retained. Potential future use of de-identified  
30 data generated in the course of this study by the coordinating center and other  
31 participating sites will be governed by mutual data use agreements.  
32  
33  
34  
35  
36  
37  
38  
39  
40  
41  
42  
43  
44  
45  
46  
47  
48  
49  
50  
51  
52  
53  
54  
55  
56  
57  
58  
59  
60

# BMJ Open

## Protocol and statistical analysis plan for the PREventing cardiovascular collaPse with Administration of fluid REsuscitation during Induction and Intubation (PREPARE II) randomized clinical trial

|                               |                                                                                                                                                                                                                                                                                                                                                                                                                                                                                                                                                                                                                                                                                                                                                                                                                                                                                                                                                                                                                                                                                                                                                                                                                                                                                                                                                                                                                                                                                                                                                                                                                                                                                                                                                                                                                                                                                                                                                                                                                                                                                                                                                                                                                                                                               |
|-------------------------------|-------------------------------------------------------------------------------------------------------------------------------------------------------------------------------------------------------------------------------------------------------------------------------------------------------------------------------------------------------------------------------------------------------------------------------------------------------------------------------------------------------------------------------------------------------------------------------------------------------------------------------------------------------------------------------------------------------------------------------------------------------------------------------------------------------------------------------------------------------------------------------------------------------------------------------------------------------------------------------------------------------------------------------------------------------------------------------------------------------------------------------------------------------------------------------------------------------------------------------------------------------------------------------------------------------------------------------------------------------------------------------------------------------------------------------------------------------------------------------------------------------------------------------------------------------------------------------------------------------------------------------------------------------------------------------------------------------------------------------------------------------------------------------------------------------------------------------------------------------------------------------------------------------------------------------------------------------------------------------------------------------------------------------------------------------------------------------------------------------------------------------------------------------------------------------------------------------------------------------------------------------------------------------|
| Journal:                      | <i>BMJ Open</i>                                                                                                                                                                                                                                                                                                                                                                                                                                                                                                                                                                                                                                                                                                                                                                                                                                                                                                                                                                                                                                                                                                                                                                                                                                                                                                                                                                                                                                                                                                                                                                                                                                                                                                                                                                                                                                                                                                                                                                                                                                                                                                                                                                                                                                                               |
| Manuscript ID                 | bmjopen-2019-036671.R1                                                                                                                                                                                                                                                                                                                                                                                                                                                                                                                                                                                                                                                                                                                                                                                                                                                                                                                                                                                                                                                                                                                                                                                                                                                                                                                                                                                                                                                                                                                                                                                                                                                                                                                                                                                                                                                                                                                                                                                                                                                                                                                                                                                                                                                        |
| Article Type:                 | Protocol                                                                                                                                                                                                                                                                                                                                                                                                                                                                                                                                                                                                                                                                                                                                                                                                                                                                                                                                                                                                                                                                                                                                                                                                                                                                                                                                                                                                                                                                                                                                                                                                                                                                                                                                                                                                                                                                                                                                                                                                                                                                                                                                                                                                                                                                      |
| Date Submitted by the Author: | 26-May-2020                                                                                                                                                                                                                                                                                                                                                                                                                                                                                                                                                                                                                                                                                                                                                                                                                                                                                                                                                                                                                                                                                                                                                                                                                                                                                                                                                                                                                                                                                                                                                                                                                                                                                                                                                                                                                                                                                                                                                                                                                                                                                                                                                                                                                                                                   |
| Complete List of Authors:     | <p>Russell, Derek ; University of Alabama at Birmingham, Department of Medicine, Division of Pulmonary, Allergy, &amp; Critical Care Medicine; Department of Veterans Affairs, Veterans Integrated Service Network 7 Casey, Jonathan; Vanderbilt University School of Medicine, Department of Medicine, Division of Allergy, Pulmonary and Critical Care Medicine Gibbs, Kevin ; Wake Forest School of Medicine, Department of Medicine, Section of Pulmonary, Critical Care, Allergy and Immunologic Disease Dargin, James; Lahey Hospital and Medical Center, Department of Medicine, Division of Pulmonary and Critical Care Medicine Vonderhaar, Derek ; Ochsner Health System, Department of Pulmonary and Critical Care Medicine Joffe, AM; University of Washington, Department of Anesthesiology and Pain Medicine Ghamande, Shekhar; Baylor Scott &amp; White Medical Center, Department of Medicine, Division of Pulmonary Disease and Critical Care Medicine Khan, Akram; Oregon Health &amp; Science University School of Medicine, Department of Medicine, Division of Pulmonary and Critical Care Medicine Dutta, Simanta; Wake Forest School of Medicine, Department of Medicine, Section of Pulmonary, Critical Care, Allergy and Immunologic Disease Landsperger, Janna; Vanderbilt University School of Medicine, Department of Medicine, Division of Allergy, Pulmonary and Critical Care Medicine Robison, Sarah; University of Alabama at Birmingham, Department of Medicine, Division of Pulmonary, Allergy, &amp; Critical Care Medicine Bentov, Itay; University of Washington, Department of Anesthesiology and Pain Medicine Wozniak, Joanne; Lahey Hospital and Medical Center, Department of Medicine, Division of Pulmonary and Critical Care Medicine Stempek, Susan; Lahey Hospital and Medical Center, Department of Medicine, Division of Pulmonary and Critical Care Medicine White, Heath; Baylor Scott &amp; White Medical Center, Department of Medicine, Division of Pulmonary Disease and Critical Care Medicine Krol, Olivia; Oregon Health &amp; Science University School of Medicine, Department of Medicine, Division of Pulmonary and Critical Care Medicine Prekker, Matthew; Hennepin County Medical Center, Department of</p> |

|                                 |                                                                                                                                                                                                                                                                                                                                                                                                                                                                                                                                                                                                                                                                                                                                                                                                                                                                                                                                                                                                                                                                                                                                                                                                                                                 |
|---------------------------------|-------------------------------------------------------------------------------------------------------------------------------------------------------------------------------------------------------------------------------------------------------------------------------------------------------------------------------------------------------------------------------------------------------------------------------------------------------------------------------------------------------------------------------------------------------------------------------------------------------------------------------------------------------------------------------------------------------------------------------------------------------------------------------------------------------------------------------------------------------------------------------------------------------------------------------------------------------------------------------------------------------------------------------------------------------------------------------------------------------------------------------------------------------------------------------------------------------------------------------------------------|
|                                 | <p>Emergency Medicine; Hennepin County Medical Center, Department of Medicine, Division of Pulmonary/Critical Care Medicine<br/> Driver, Brian; Hennepin County Medical Center, Department of Emergency Medicine<br/> Brewer, Joseph; University of Mississippi Medical Center, Department of Medicine, Division of Pulmonary, Critical Care, and Sleep Medicine<br/> Wang, Li; Vanderbilt University School of Medicine, Department of Medicine, Division of Allergy, Pulmonary and Critical Care Medicine<br/> Lindsell, Christopher; Vanderbilt University School of Medicine, Department of Medicine, Division of Allergy, Pulmonary and Critical Care Medicine<br/> Self, Wesley; Vanderbilt University School of Medicine, Department of Emergency Medicine<br/> Rice, Todd; Vanderbilt University School of Medicine, Department of Medicine, Division of Allergy, Pulmonary and Critical Care Medicine<br/> Semler, Matthew; Vanderbilt University School of Medicine, Department of Medicine, Division of Allergy, Pulmonary and Critical Care Medicine<br/> Janz, David; Louisiana State University School of Medicine in New Orleans, Department of Medicine, Section of Pulmonary/Critical Care Medicine and Allergy/Immunology</p> |
| <b>Primary Subject Heading</b>: | Research methods                                                                                                                                                                                                                                                                                                                                                                                                                                                                                                                                                                                                                                                                                                                                                                                                                                                                                                                                                                                                                                                                                                                                                                                                                                |
| Secondary Subject Heading:      | Intensive care, Medical management, Respiratory medicine                                                                                                                                                                                                                                                                                                                                                                                                                                                                                                                                                                                                                                                                                                                                                                                                                                                                                                                                                                                                                                                                                                                                                                                        |
| Keywords:                       | Adult intensive & critical care < ANAESTHETICS, Thoracic medicine < INTERNAL MEDICINE, Clinical trials < THERAPEUTICS                                                                                                                                                                                                                                                                                                                                                                                                                                                                                                                                                                                                                                                                                                                                                                                                                                                                                                                                                                                                                                                                                                                           |
|                                 |                                                                                                                                                                                                                                                                                                                                                                                                                                                                                                                                                                                                                                                                                                                                                                                                                                                                                                                                                                                                                                                                                                                                                                                                                                                 |

SCHOLARONE™  
Manuscripts

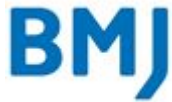

I, the Submitting Author has the right to grant and does grant on behalf of all authors of the Work (as defined in the below author licence), an exclusive licence and/or a non-exclusive licence for contributions from authors who are: i) UK Crown employees; ii) where BMJ has agreed a CC-BY licence shall apply, and/or iii) in accordance with the terms applicable for US Federal Government officers or employees acting as part of their official duties; on a worldwide, perpetual, irrevocable, royalty-free basis to BMJ Publishing Group Ltd ("BMJ") its licensees and where the relevant Journal is co-owned by BMJ to the co-owners of the Journal, to publish the Work in this journal and any other BMJ products and to exploit all rights, as set out in our [licence](#).

The Submitting Author accepts and understands that any supply made under these terms is made by BMJ to the Submitting Author unless you are acting as an employee on behalf of your employer or a postgraduate student of an affiliated institution which is paying any applicable article publishing charge ("APC") for Open Access articles. Where the Submitting Author wishes to make the Work available on an Open Access basis (and intends to pay the relevant APC), the terms of reuse of such Open Access shall be governed by a Creative Commons licence – details of these licences and which [Creative Commons](#) licence will apply to this Work are set out in our licence referred to above.

Other than as permitted in any relevant BMJ Author's Self Archiving Policies, I confirm this Work has not been accepted for publication elsewhere, is not being considered for publication elsewhere and does not duplicate material already published. I confirm all authors consent to publication of this Work and authorise the granting of this licence.

(MARKED COPY—changes delineated in red text)

**Protocol and statistical analysis plan for the PREventing cardiovascular collaPse with Administration of fluid REsuscitation during Induction and Intubation (PREPARE II) randomized clinical trial**

Derek W. Russell\*, MD<sup>1</sup>; Jonathan D. Casey\*, MD, MSc<sup>2</sup>; Kevin W. Gibbs, MD<sup>3</sup>; James M. Dargin, MD<sup>4</sup>; Derek J. Vonderhaar MD<sup>5</sup>; Aaron M. Joffe, DO<sup>6</sup>; Shekhar Ghamande, MD<sup>7</sup>; Akram Khan, MD<sup>8</sup>; Simanta Dutta, MD<sup>3</sup>; Janna S. Landsperger, MS, PA-C<sup>2</sup>; Sarah W. Robison, MD<sup>1</sup>; Itay Bentov, MD, PhD<sup>6</sup>; Joanne M. Wozniak, PA-C<sup>4</sup>; Susan Stempek, PA-C<sup>4</sup>; Heath D. White, DO, MS<sup>7</sup>; Olivia F. Krol, BS<sup>8</sup>; Matthew E. Prekker, MD<sup>9,10</sup>; Brian E. Driver, MD<sup>10</sup>; Joseph M. Brewer, DO<sup>11</sup>; Li Wang, MS<sup>2</sup>; Christopher J. Lindsell PhD<sup>2</sup>; Wesley H. Self, MD, MPH<sup>12</sup>; Todd W. Rice, MD, MSc<sup>2</sup>; Matthew W. Semler\*\*, MD, MSc<sup>2</sup>; David R. Janz\*\*, MD, MSc<sup>13</sup> for the PREPARE II Investigators# and the Pragmatic Critical Care Research Group.

**Affiliations:**

<sup>1</sup>University of Alabama at Birmingham, Department of Medicine, Division of Pulmonary, Allergy and Critical Care Medicine; Birmingham Veteran's Affairs Medical Center, Pulmonary Section; <sup>2</sup> Vanderbilt University School of Medicine, Department of Medicine, Division of Allergy, Pulmonary and Critical Care Medicine; <sup>3</sup>Wake Forest School of Medicine, Department of Medicine, Section of Pulmonary, Critical Care, Allergy and Immunologic Disease; <sup>4</sup>Lahey Hospital and Medical Center, Department of Medicine, Division of Pulmonary and Critical Care Medicine; <sup>5</sup>Ochsner Health System New Orleans, Department of Pulmonary and Critical Care Medicine; <sup>6</sup>University of Washington, Department of Anesthesiology and Pain Medicine; <sup>7</sup>Baylor Scott & White Medical Center, Department of Medicine, Division of Pulmonary Disease and Critical Care Medicine; <sup>8</sup>Oregon Health and Science University School of Medicine, Department of Medicine, Division of Pulmonary and Critical Care Medicine; <sup>9</sup>Hennepin County Medical Center, Department of Emergency Medicine; <sup>10</sup>Hennepin County Medical Center, Department of Medicine, Division of Pulmonary/Critical Care Medicine; <sup>11</sup>University of Mississippi Medical Center, Department of Medicine, Division of Pulmonary, Critical Care, and Sleep Medicine; <sup>12</sup> Vanderbilt University School of Medicine, Department of Emergency Medicine; <sup>13</sup> Louisiana State University School of Medicine New Orleans, Department of Medicine, Section of Pulmonary/Critical Care Medicine and Allergy/Immunology.

\*Authors contributed equally

\*\*Authors contributed equally

#A full list of the PREPARE II Investigators can be found below

**Corresponding Author:**

Derek W. Russell, MD

**Email:**[dwrussell@uabmc.edu](mailto:dwrussell@uabmc.edu)**Address:**

Lyons Harrison Research Building Room 321  
701 19<sup>th</sup> St. S  
Birmingham, AL 35294

**Telephone:**

205-996-1496

**Fax:**

205-996-4699

**Author contributions:** All study authors approved the final version of this manuscript. Study concept and design: D.W.R., J.D.C., M.W.S., D.R.J., C.J.L., L.W., W.H.S., and T.W.R.; Acquisition of data: D.W.R., J.D.C., K.W.G., J.D., D.J.V., A.M.J., S.G., A.K., S.D., J.S.L., S.R., I.B., J.W., H.W., O.F.K., M.E.P., B.E.D., J.M.B., K.W.G., S.G., A.K., W.H.S., S.S., T.W.R., M.W.S., D.R.J., and the PREPARE II Investigators; Drafting of the manuscript: D.W.R., J.D.C., D.R.J., M.W.S.; Critical revision of the manuscript for important intellectual content: D.W.R., J.D.C., K.W.G., J.D., D.J.V., A.M.J., S.G., A.K., S.D., J.S.L., S.R., I.B., J.W., H.W., O.F.K., M.E.P., B.E.D., J.M.B., K.W.G., S.G., A.K., W.H.S., S.S., C.J.L., L.W., T.W.R., M.W.S., D.R.J., and the PREPARE II Investigators; Study supervision: D.R.J. and M.W.S.

**Sources of Funding:** Jonathan D. Casey was supported in part by the NHLBI (2T32HL087738-12 and K12HL133117). Matthew W. Semler was supported in part by the NHLBI (K23HL143053). Derek W. Russell was supported in part by the UAB Walter Frommeyer, Jr. Fellowship in Investigative Medicine and by the Department of Veteran's Affairs (VISN 7 Research Development Award). Data collection utilized the Research Electronic Data Capture (REDCap) tool developed and maintained with Vanderbilt Institute for Clinical and Translational Research grant support (UL1 TR002234 from NCATS/NIH). The funding institutions had no role in (1) conception, design, or conduct of the study, (2) collection, management, analysis, interpretation, or presentation of the data, or (3) preparation, review, or approval of the manuscript.

1  
2  
3 **Competing Interest Statement:** The authors report no conflicts of interest with the  
4 contents of this manuscript.  
5  
6  
7

8 **Key words for indexing:** Endotracheal intubation, fluid loading, post-intubation  
9 hypotension, cardiovascular collapse  
10  
11  
12

13 **Manuscript Word Count (body only):** 4369 words  
14  
15

16 **Abstract Word Count:** 296/300  
17  
18  
19  
20  
21  
22  
23  
24  
25  
26  
27  
28  
29  
30  
31  
32  
33  
34  
35  
36  
37  
38  
39  
40  
41  
42  
43  
44  
45  
46  
47  
48  
49  
50  
51  
52  
53  
54  
55  
56  
57  
58  
59  
60

**Abstract:**

**Introduction:** Cardiovascular collapse is a common complication during tracheal intubation of critically ill adults. Whether administration of an intravenous fluid bolus prevents cardiovascular collapse during tracheal intubation remains uncertain. A prior randomized trial found fluid bolus administration to be ineffective overall but suggested potential benefit for patients receiving positive pressure ventilation during tracheal intubation.

**Methods and Analysis:**

The PREventing cardiovascular collapse with Addministration of fluid REsuscitation during Induction and Intubation (PREPARE II) trial is a prospective, multi-center, non-blinded randomized trial being conducted in 13 academic intensive care units in the United States. The trial will randomize 1,065 critically ill adults undergoing tracheal intubation with planned use of positive pressure ventilation (non-invasive ventilation or bag-mask ventilation) between induction and laryngoscopy to receive 500 mL of intravenous crystalloid or no intravenous fluid bolus. The primary outcome is cardiovascular collapse, defined as any of: SBP <65 mm Hg, new or increased vasopressor administration between induction and 2 minutes after intubation, or cardiac arrest or death between induction and 1 hour after intubation. The primary analysis will be an unadjusted, intention-to-treat comparison of the primary outcome between patients randomized to fluid bolus administration and patients randomized to no fluid bolus administration using a Chi-square test. The sole secondary outcome is 28-day in-



1  
2  
3 hospital mortality. Enrolment began on February 1, 2019 and is expected to conclude in  
4  
5 June, 2020.  
6  
7  
8  
9

### 10 **Ethics and Dissemination:**

11  
12 The trial was approved by either the central institutional review board at Vanderbilt  
13  
14 University Medical Center or the local institutional review board at each trial site.  
15

16  
17 Results will be submitted for publication in a peer-reviewed journal and presented at  
18  
19 scientific conferences.  
20  
21  
22  
23

### 24 **Trial Registration:**

25  
26 This trial was registered with ClinicalTrials.gov (NCT03787732) on December 25, 2018,  
27  
28 prior to the enrolment of the first patient.  
29  
30  
31  
32  
33  
34  
35  
36  
37  
38  
39  
40  
41  
42  
43  
44  
45  
46  
47  
48  
49  
50  
51  
52  
53  
54  
55  
56  
57  
58  
59  
60

### Strengths and Limitations:

- This multi-center, randomized, controlled trial with target enrolment of 1065 patients will provide the highest quality available evidence for an important question in a commonly encountered clinical scenario.
- Broad eligibility criteria and enrolment at multiple centers will increase the external validity of the findings.
- Blinding is impractical due to the nature of this study intervention.
- The trial is not designed to examine the effects of fluid composition or volume of fluid administered.

## Introduction:

Tracheal intubation is common in the care of critically ill patients but is associated with a high incidence of complications<sup>1-3</sup>. Cardiovascular collapse is a composite of life-threatening haemodynamic complications of tracheal intubation comprised of post-intubation hypotension<sup>4-6</sup>, administration of vasopressors to treat hypotension, cardiac arrest, and death. Cardiovascular collapse occurs in 20-30% of critically ill patients undergoing tracheal intubation<sup>7 8</sup>, and is associated with increased in-hospital mortality<sup>5 6 9</sup>.

Some airway management experts recommend the intravenous administration of a fluid bolus beginning prior to induction (i.e., the administration of procedural drugs such as anaesthetics) to prevent cardiovascular collapse during tracheal intubation<sup>4 10</sup>. A fluid bolus could address the haemodynamic perturbations induced by induction and tracheal intubation, which include vasodilatory effects of induction medications, increased venous capacitance due to decreased circulating catecholamines, and decreased venous return secondary to positive pressure applied to the thoracic cavity. However, the only reported trial to examine administration of a pre-intubation fluid bolus, the PrePARE (Preventing cardiovascular collaPse with Administration of fluid Resuscitation before Endotracheal intubation) trial, reported that a pre-intubation fluid bolus had no effect on the overall rate of cardiovascular collapse<sup>8</sup>. The receipt of positive pressure ventilation, however, appeared to modify the effect of a fluid bolus administration on cardiovascular collapse in the PrePARE trial. Patients receiving positive pressure ventilation appeared to have a lower rate cardiovascular collapse in the fluid bolus group compared to the no fluid bolus group, both among patients

1  
2  
3 receiving non-invasive ventilation for pre-oxygenation (RR 0.51; 95% confidence  
4 interval [CI], 0.24-1.09; P value for interaction = 0.032) and among patients receiving  
5 bag-mask ventilation between induction and laryngoscopy (RR 0.61; 95% CI, 0.33-1.13;  
6  
7 P value for interaction = 0.008)<sup>8</sup>.

8  
9  
10  
11  
12 Provision of positive pressure ventilation with a bag-mask device between  
13 induction and laryngoscopy has been shown to decrease the incidence of severe  
14 hypoxaemia during tracheal intubation of intensive care unit (ICU) patients (relative risk,  
15 0.48; 95%, CI, 0.30 to 0.77)<sup>11</sup>. These results, and others examining use of non-invasive  
16 ventilation for pre-oxygenation during ICU intubations<sup>12</sup>, suggest that positive pressure  
17 ventilation should be provided during tracheal intubation for most critically ill patients<sup>10</sup>.  
18  
19 This increases the importance of investigating the finding from the PrePARE trial that a  
20 pre-induction fluid bolus might prevent cardiovascular collapse among patients receiving  
21 positive pressure ventilation. We designed the PREventing cardiovascular collaPse with  
22 Admistration of fluid REsuscitation during Induction and Intubation (PREPARE II) trial  
23 to examine the hypothesis that administration of a fluid bolus beginning prior to  
24 induction will decrease the incidence of cardiovascular collapse among critically ill  
25 adults undergoing tracheal intubation with positive pressure ventilation between  
26 induction and laryngoscopy.

## 27 28 29 30 31 32 33 34 35 36 37 38 39 40 41 42 43 44 45 46 47 **Methods and Analysis:**

48  
49 This manuscript was written in accordance with Standard Protocol Items:  
50 Recommendations for Interventional Trials (SPIRIT) guidelines (see [Table 1](#) below and  
51 [Supplementary file 1, section 1](#))<sup>13</sup>.  
52  
53  
54  
55  
56  
57  
58  
59  
60

|                                 | STUDY PERIOD           |                                            |                |    |                   |                |                  |                                       |
|---------------------------------|------------------------|--------------------------------------------|----------------|----|-------------------|----------------|------------------|---------------------------------------|
|                                 | Enrollment             | Allocation                                 | On-Study       |    |                   |                |                  | On-Study                              |
| TIMEPOINT                       | Decision to perform TI | Between decision to intubate and Induction | Sedative & NMB | TI | 2 minutes post-TI | 1 hour post TI | 24 hours post-TI | Discharge or 28 days after enrollment |
| ENROLMENT:                      | X                      |                                            |                |    |                   |                |                  |                                       |
| Eligibility screen              | X                      |                                            |                |    |                   |                |                  |                                       |
| Allocation                      |                        | X                                          |                |    |                   |                |                  |                                       |
| INTERVENTIONS:                  |                        |                                            |                |    |                   |                |                  |                                       |
| Fluid Bolus Initiation          |                        | X                                          |                |    |                   |                |                  |                                       |
| Screening for contraindications | X                      | X                                          |                |    |                   |                |                  |                                       |
| No New Fluid Bolus              |                        | X                                          |                |    |                   |                |                  |                                       |
| Screening for contraindications | X                      | X                                          |                |    |                   |                |                  |                                       |
| ASSESSMENTS:                    |                        |                                            |                |    |                   |                |                  |                                       |
| Baseline Variables              | X                      | X                                          |                |    |                   |                |                  |                                       |
| Peri-procedural variables       |                        | X                                          | X              | X  | X                 |                |                  |                                       |
| Clinical Outcomes               |                        |                                            |                |    |                   | X              | X                | X                                     |

**Table 1: Standard Protocol Items: Recommendations for Interventional Trials (SPIRIT) checklist** Baseline variables obtained from medical record include: demographic characteristics, APACHEII score, and presence of sepsis/septic shock. Peri-procedural data collected by independent, trained observer includes the following: whether fluids were infusing prior to enrollment, receipt of the study intervention, the volume of study crystalloid infused (induction and 2 minutes after procedure), use of prophylactic vasopressor (or prophylactically increased vasopressor dose), addition of new vasopressor (or increased vasopressor dose), and systolic blood pressure (at baseline and nadir from induction to 2 minutes after procedure). Peri-procedural data collected by operator includes: sedation drugs used (and doses), oxygenation/ventilation modality between induction and laryngoscopy, and procedural complications. Clinical outcomes include: vital status (overall in-hospital death, cardiac arrest death within 1 hour of TI), number of ventilator-free days to 28 days, and number of ICU-free days to 28 days. TI: tracheal intubation. NMB: neuromuscular blockade.

### *Patient and Public Involvement*

Materials used to communicate about the study with patients and family members were developed with input from the Vanderbilt Community Advisory Council.

1  
2  
3 Study authors will disseminate the results of this study online and via social media in  
4 forms suitable for public understanding.  
5  
6  
7  
8  
9

### 10 *Study Design*

11  
12 The PREPARE II trial is a pragmatic, multi-center, un-blinded, parallel group,  
13 randomized trial. Among critically ill adults undergoing tracheal intubation undergoing  
14 positive pressure ventilation between induction and laryngoscopy, PREPARE II  
15 compares incidence of cardiovascular collapse between patients administered  
16 intravenous administration of a 500 mL fluid bolus and those receiving no fluid bolus  
17 administration. The trial protocol was approved with waiver of informed consent by  
18 either the central institutional review board at Vanderbilt University Medical Center or  
19 the local institutional review board at each trial site. The trial was registered prior to  
20 initiation of enrolment (ClinicalTrials.gov identifier: NCT03787732). An independent data  
21 and safety monitoring board (DSMB) is monitoring the progress and safety of the trial.  
22  
23  
24  
25  
26  
27  
28  
29  
30  
31  
32  
33  
34  
35  
36  
37

### 38 *Study Sites*

39  
40 PREPARE II is being conducted in 13 intensive care units at academic medical  
41 centers across the United States. Site characteristics are listed in [Supplementary file](#)  
42 [1, section 2](#).  
43  
44  
45  
46  
47  
48

### 49 *Population*

50  
51 In order to maximise the generalisability of this trial, the target population is  
52 meant to be broad and encompass all patients in whom the treating clinician judges  
53  
54  
55  
56  
57  
58  
59  
60

1  
2  
3 there to be clinical equipoise on the use of the intervention. The trial includes adults  
4  
5 (age  $\geq 18$  years) located in a participating ICU for whom the treating clinicians have  
6  
7 determined that tracheal intubation is required and for whom the planned procedural  
8  
9 approach includes an operator who routinely performs tracheal intubation in the  
10  
11 participating unit, administration of sedation (with or without neuromuscular blockade),  
12  
13 and positive-pressure ventilation between induction and laryngoscopy. The trial  
14  
15 excludes pregnant women and prisoners. In order for clinicians to not feel compelled to  
16  
17 provide or withhold an intervention which they feel is wrong for a given patient, the trial  
18  
19 also excludes patients for whom the treating clinicians feel (based upon their clinical  
20  
21 judgment at the time of enrolment) that the urgency of the intubation precludes safe  
22  
23 performance of study procedures or that fluid bolus administration is either required or  
24  
25 contraindicated.  
26  
27  
28  
29  
30  
31  
32

### 33 *Randomization and Treatment Allocation*

34  
35 Patients are randomized in a 1:1 ratio to intravenous fluid bolus administration or  
36  
37 no fluid bolus administration in permuted blocks of two, four, or six, stratified according  
38  
39 to study site. Study-group assignments (see [Supplementary file 1, section 3; Figure](#)  
40  
41 [S1](#)) are placed in sequentially numbered opaque envelopes and remain concealed until  
42  
43 after enrolment. After enrolment and randomization, patients, treating clinicians, and  
44  
45 study personnel are not blinded to study group assignment.  
46  
47  
48  
49  
50

### 51 *Study Interventions*

#### 52 Fluid Bolus Group

53  
54  
55  
56  
57  
58  
59  
60

1  
2  
3 For patients who are assigned to the fluid bolus group, intravenous infusion of  
4 500 mL of a crystalloid solution of the operator's choosing is initiated after  
5  
6 randomization and prior to induction. The fluid bolus is infused from above the level of  
7  
8 the intravenous or intra-osseous access and allowed to infuse by gravity, manual  
9  
10 pressure, or bag pressure. The fluid bolus is discontinued after 500 mL have infused.  
11  
12 For patients assigned to the fluids bolus group who are already receiving a fluid  
13  
14 infusion, administration of 500mL of fluids between randomization and induction is  
15  
16 achieved with either an additional bolus or increasing the rate of the existing infusion.  
17  
18  
19  
20  
21  
22  
23

#### 24 No Fluid Bolus Group

25  
26 For patients who are assigned to the no fluid bolus group, intravenous fluid  
27  
28 administration is not initiated between randomization and induction. Intravenous fluid  
29  
30 infusions initiated prior to randomization are not altered.  
31  
32  
33  
34

#### 35 Co-Interventions

36  
37 Regardless of study group assignment, treating clinicians determine the timing of  
38  
39 induction and tracheal intubation. Treating clinicians may stop infusion of a fluid bolus,  
40  
41 increase or decrease the rate of infusion, or add a new fluid bolus at any time if felt to  
42  
43 be required for the optimal care of the patient. Study group assignment determines only  
44  
45 the initiation of intravenous fluid bolus administered between randomization and  
46  
47 induction. **Figure 1** depicts the timeline of study procedures in the context of the  
48  
49 tracheal intubation procedure.  
50  
51  
52  
53  
54  
55  
56  
57  
58  
59  
60



1  
2  
3 Because the study enrolls only patients for whom treating clinicians plan to  
4 administer positive-pressure ventilation between induction and laryngoscopy, most  
5 patients receive either non-invasive ventilation or bag-mask ventilation between  
6 induction and laryngoscopy. Instances in which positive-pressure ventilation between  
7 induction and laryngoscopy is not administered are recorded, along with the reason that  
8 positive-pressure ventilation was not administered (e.g., emesis arising between  
9 randomization and induction).  
10  
11  
12  
13  
14  
15  
16  
17  
18

19 Treating clinicians determine the decision to intubate, modality and timing of pre-  
20 oxygenation, choice, dose, and timing of medications for induction and neuromuscular  
21 blockade, decision to administer vasopressors before or after induction, choice of  
22 laryngoscope, use of cricoid pressure, method of positive pressure ventilation (non-  
23 invasive ventilation or bag-mask ventilation) between induction and laryngoscopy,  
24 decision to administer intravenous fluid for the treatment of hypotension, and use of  
25 additional airway management equipment and personnel. Data on these co-  
26 interventions is prospectively collected.  
27  
28  
29  
30  
31  
32  
33  
34  
35  
36  
37

38 In some participating units, patients may be co-enrolled in a randomized trial  
39 comparing use of bougie versus use of an endotracheal tube with stylet on the first  
40 attempt at tracheal intubation (ClinicalTrials.gov, NCT03928925). An interaction  
41 between the interventions evaluated in these trials is not anticipated and the results will  
42 be reported separately.  
43  
44  
45  
46  
47  
48  
49  
50

### 51 *Data Collection*

52  
53  
54  
55  
56  
57  
58  
59  
60

1  
2  
3 Data collection for this study is described in detail in [Supplementary file 1](#),  
4  
5 [Section 4](#) and [Table 1](#) provides further detail on data collection procedures.  
6  
7

### 8 9 10 *Primary Outcome*

11  
12 The primary outcome is cardiovascular collapse, defined as the occurrence of  
13  
14 one or more of the following: Systolic blood pressure (SBP) < 65 mmHg between  
15  
16 induction and 2 minutes after intubation; new or increased vasopressor administration  
17  
18 between induction and 2 minutes after intubation; cardiac arrest between induction and  
19  
20 1 hour after intubation; or death between induction and 1 hour after intubation.  
21  
22

23  
24 Cardiovascular collapse is a commonly used endpoint in airway management  
25  
26 research<sup>4 8</sup>. Cardiovascular collapse is considered a “reasonably likely surrogate  
27  
28 endpoint” for short-term mortality because a strong mechanistic rationale links severe  
29  
30 hypotension and cardiac arrest to short-term mortality and interventions that prevent  
31  
32 cardiovascular collapse might reasonably be expected to prevent short-term mortality<sup>14</sup>.  
33  
34 Cardiovascular collapse was the primary outcome of the recently completed PrePARE  
35  
36 trial<sup>8</sup>, on which the design of the PREPARE II trial was based. In the PrePARE trial, the  
37  
38 absolute risk of in-hospital mortality was 16.7% (95% CI 3.4% to 30.0%) higher among  
39  
40 patients who experienced cardiovascular collapse during intubation compared with  
41  
42 patients who did not<sup>8</sup>.  
43  
44  
45

### 46 47 48 49 *Secondary Outcome*

50  
51 The sole secondary outcome is 28-day all-cause in-hospital mortality  
52  
53 ([Supplementary file 1, section 5](#)). Short-term mortality is a commonly used patient-  
54  
55  
56  
57  
58  
59

centered clinical endpoint for randomized trials in intensive care medicine and may be mechanistically associated with the primary outcome of cardiovascular collapse.

### *Exploratory Clinical Outcomes*

- Each individual component of the composite primary endpoint:
  - SBP < 65 mmHg between induction and 2 minutes after intubation
  - new or increased vasopressor administration between induction and 2 minutes after intubation
  - cardiac arrest between induction and 1 hour after intubation
  - death between induction and 1 hour after intubation.
- Lowest SBP between induction and 2 minutes after intubation
- Change in SBP from induction to lowest SBP between induction and 2 minutes after intubation
- Ventilator-free days to 28 days (defined in [Supplementary file 1, section 6](#))
- ICU-free days to 28 days (defined in [Supplementary file 1, section 7](#))

### *Exploratory Safety Outcomes*

- Lowest arterial oxygen saturation between induction and 2 minutes after intubation
- Incidence of hypoxaemia (oxygen saturation < 90%) between induction and 2 minutes after intubation

- Incidence of severe hypoxaemia (oxygen saturation < 80%) between induction and 2 minutes after intubation
- Oxygen saturation at 24 hours after intubation
- Fraction of inspired oxygen at 24 hours after intubation
- Positive end expiratory pressure at 24 hours after intubation
- SBP at 24 hours after intubation

### *Exploratory Process Measures*

- Initiation of an intravenous fluid bolus between induction and 2 minutes after intubation
- Time from induction to successful intubation
- Incidence of successful intubation on the first laryngoscopy attempt
- Number of laryngoscopy attempts
- Cormack-Lehane grade of glottic view on first attempt
- Operator-assessed difficulty of intubation
- Need for additional airway equipment or a second operator

### *Initial Sample Size Estimation*

In a prior randomized trial comparing fluid bolus administration beginning prior to induction versus no fluid bolus administration in the same setting as the current trial, the incidence of cardiovascular collapse was 19.6% in the fluid bolus group and 18.3% in the no fluid bolus group overall. However, among the subgroup of patients assigned to receive positive pressure ventilation with a bag-mask device between induction and

1  
2  
3 laryngoscopy, the incidence of cardiovascular collapse was 16.0% in the fluid bolus  
4  
5 group and 26.2% in the no fluid bolus group (10% absolute risk difference and 40%  
6  
7 relative risk difference). Assuming more conservative rates of cardiovascular collapse of  
8  
9 16.25% in the fluid bolus group and 25.0% in the no fluid bolus group (8.75% absolute  
10  
11 risk difference and 35% relative risk difference), we calculated that enrolling 714  
12  
13 patients would provide 80 percent statistical power at a two-sided alpha level of 0.05.  
14  
15 Anticipating less than 5% missing data for the primary outcome, the initial planned  
16  
17 enrolment for the trial was 750 patients. The study protocol included a pre-specified  
18  
19 sample size re-estimation following the single interim analysis (see *Sample Size Re-*  
20  
21 *estimation*)  
22  
23  
24  
25  
26  
27

#### 28 *Data and Safety Monitoring Board (DSMB) and Interim Analysis*

29  
30 A DSMB composed of experts in clinical trials, critical care medicine,  
31  
32 anaesthesia, and emergency medicine is overseeing the design and conduct of the trial.  
33  
34 The DSMB conducted a single interim analysis for efficacy and safety at the anticipated  
35  
36 halfway point of the trial, after enrolment of 375 patients, on November 12, 2019.  
37  
38 Stopping criteria were pre-specified in the study protocol, suggesting termination of the  
39  
40 trial at the interim if the P value for the difference between groups in the incidence of the  
41  
42 primary outcome (cardiovascular collapse) or secondary outcome (28-day in-hospital  
43  
44 mortality) were 0.001 or less using a chi-square test. Using this conservative Haybittle–  
45  
46 Peto boundary ( $P \leq 0.001$ ) allows the final analysis at the end of the trial to be  
47  
48 performed using an unchanged level of significance.  
49  
50  
51  
52  
53  
54  
55  
56  
57  
58  
59  
60

1  
2  
3 The DSMB also formally evaluated the trial for safety and examined the highest  
4 fraction of inspired oxygen, highest positive end expiratory pressure, and lowest arterial  
5 oxygen saturation at 24 hours after intubation in each study group. The prespecified  
6 early stopping criteria for physiologic outcomes were as follows: if the  $P$  value for the  
7 difference between study groups in any of these three physiologic variables were 0.001  
8 or less using a Mann-Whitney rank-sum test and concordant in direction with the point-  
9 estimate for mortality.  
10  
11  
12  
13  
14  
15  
16  
17  
18

19 At the interim analysis, finding that no stopping criteria had been met and no  
20 safety concerns were observed, the DSMB recommended continuing the trial.  
21  
22  
23  
24  
25

### 26 *Sample Size Re-Estimation*

27

28 The study protocol specified that, after completion of the interim analysis and the  
29 recommendation to continue enrolment, “the DSMB will evaluate the rate of the primary  
30 outcome in the no fluid bolus group. If the incidence of the primary outcome in the no  
31 fluid bolus group differs from the original estimate of 25.0%, the DSMB may ask that the  
32 investigators perform a sample size re-estimation to maintain adequate statistical power  
33 to detect the planned relative risk difference in the primary outcome between groups.”  
34  
35  
36  
37  
38  
39  
40  
41

42 After completion of the interim analysis and the recommendation to continue  
43 enrolment, the DSMB examined the number of patients that would need to be enrolled  
44 in order to maintain 80% statistical power to detect the planned relative risk reduction of  
45 35% in the primary outcome. Based on this information, the DSMB recommended  
46 increasing the total sample size from 750 to 1,065 patients. The investigators accepted  
47 the DSMB’s recommendation, revising the planned sample size for the final trial to  
48  
49  
50  
51  
52  
53  
54  
55  
56  
57  
58  
59  
60

1  
2  
3 1,065 patients. During the sample size re-estimation, both the study investigators and  
4  
5 the DSMB remained blind to all outcomes by study group. No further interim analyses  
6  
7 are planned.  
8  
9

### 10 11 12 *Statistical Analysis Principles* 13

14 R version 3.5.2 (R Foundation for Statistical Computing, Vienna, Austria) will be  
15 used for all analyses. Continuous variables will be reported as mean  $\pm$  SD or median  
16  
17 and IQR; categorical variables will be reported as frequencies and proportions.  
18  
19 Between-group comparisons will be made with the Mann-Whitney rank-sum test for  
20  
21 continuous variables, and the chi-square test for categorical variables  
22  
23  
24  
25  
26  
27

### 28 *Primary Analysis of the Primary Outcome* 29

30  
31 The primary analysis will be an unadjusted, intention-to-treat comparison of  
32  
33 patients randomized to the fluid bolus group versus patients randomized to the no fluid  
34  
35 bolus group with regard to the primary outcome of cardiovascular collapse. Between  
36  
37 group differences will be tested using an unadjusted chi-square test. A P value < 0.05  
38  
39 will be used to indicate statistical significance for the primary analysis.  
40  
41  
42  
43

### 44 *Secondary Analyses of the Primary Outcome* 45

46  
47 To account for potential confounders, we will develop a logistic regression model  
48  
49 with cardiovascular collapse (primary outcome) as the dependent variable and  
50  
51 independent variables to include study group (fluid bolus group vs no fluid bolus group)  
52  
53 and relevant confounders (age, APACHE II score at enrolment, presence of sepsis or  
54  
55  
56  
57  
58  
59

1  
2  
3 septic shock, vasopressor receipt in the hour prior to enrolment, and receipt of  
4 intravenous fluid infusion initiated prior to enrolment). We will also develop a logistic  
5 regression model accounting for the above variables plus any baseline characteristics  
6 that appear on visual review to be potentially imbalanced between the study groups.  
7  
8  
9

10  
11  
12 Because patients within a specific ICU may be more similar to other patients  
13 within the same ICU than to patients in other ICUs, we will fit a generalized linear  
14 mixed-effects model with the outcome of cardiovascular collapse, including group  
15 assignment as a fixed effect and study unit (stratification variable) as a random effect.  
16  
17  
18

19  
20 We will repeat the primary analysis using alternative definitions of  
21 cardiovascular collapse, including: (1) using an SBP < 90 mm Hg rather than an SBP  
22 <65 mm Hg, (2) using 28-day in-hospital mortality rather than death within 1 hour, and  
23  
24  
25  
26  
27  
28 (3) using days from enrolment to in-hospital death (defined in [Supplementary file 1,](#)  
29 [section 8](#)) rather than death within 1 hour.  
30  
31  
32

33  
34 Interpreting composite endpoints can be challenging when the components have  
35 different levels of clinical importance. We will repeat the primary analysis of the primary  
36 outcome using a global rank scale. Use of a hierarchical global rank score places  
37 greater weight on the objective, patient-centered clinical outcomes (death, cardiac  
38 arrest) than on the immediate physiologic outcomes (hypotension and vasopressors).  
39  
40  
41  
42  
43  
44 The global rank endpoint will be constructed by comparing each patient with every other  
45 patient in the study and assigning a score for each pairwise comparison based on  
46  
47  
48  
49  
50  
51  
52  
53  
54  
55  
56  
57  
58  
59  
60 whom fared better. To make the pairwise comparison, we will consider a priority order of  
endpoints: (1) death within one hour of intubation; (2) cardiac arrest within one hour of  
intubation; (3) SBP < 65 mmHg between induction and two minutes after intubation; and



1  
2  
3 (4) new or increased vasopressor administration between induction and two minutes  
4 after intubation. The scores will be summarized and compared between study groups  
5  
6 (fluid bolus group vs no fluid bolus group) using an unadjusted Mann-Whitney U test.  
7  
8  
9

10 Given the findings of the PrePARE trial subgroup analysis (i.e., that the effect of  
11 fluid bolus administration on cardiovascular collapse may be related to the receipt of  
12 positive pressure ventilation during intubation)<sup>8</sup>, we will repeat the primary analysis  
13 excluding patients who did not receive positive pressure during intubation. Because  
14 many critical care patients are already receiving intravenous fluid for other indications  
15 when the decision is made to intubate and this may modify the effect of a new fluid  
16 bolus, we will repeat the primary analysis excluding patients who were already receiving  
17 intravenous fluid at the time of enrolment.  
18  
19  
20  
21  
22  
23  
24  
25  
26  
27  
28  
29

### 30 *Analysis of Effect Modification for the Primary Outcome*

31  
32  
33 We will examine whether pre-specified baseline variables modify the effect of  
34 treatment group on the primary outcome using formal tests of statistical interaction in a  
35 logistic regression model. Independent variables will include study group assignment,  
36 the potential effect modifier of interest, and the interaction between the two (e.g., study  
37 group \* presence of sepsis or septic shock). Significance will be determined by the P  
38 value for the interaction term, with values less than 0.10 considered to suggest of a  
39 potential interaction and values less than 0.05 considered to confirm an interaction.  
40  
41 Continuous variables will be analyzed using restricted cubic splines and preferentially  
42 displayed as continuous variables with 3-5 knots using a locally weighted regression or  
43 partial effects plots. We will use a forest plot to display the effect of covariates. If  
44  
45  
46  
47  
48  
49  
50  
51  
52  
53  
54  
55  
56  
57  
58  
59  
60

1  
2  
3 required for data presentation, continuous variables will be dichotomized for inclusion in  
4  
5 a forest plot. We will examine whether the following baseline variables modify the effect  
6  
7 of study group on the primary outcome:  
8  
9

- 10 1. APACHE II score at enrolment (continuous variable);
- 11
- 12 2. Presence of sepsis or septic shock at time of enrolment (yes/no);
- 13
- 14 3. Receipt of vasopressors in the 1 hour prior to enrolment (yes/no);
- 15
- 16
- 17 4. Predicted probability of cardiovascular collapse as calculated by a pre-
- 18
- 19 specified multivariable model (continuous variable);
- 20
- 21
- 22
- 23

24 In addition to the above variables which can be assessed prior to study  
25  
26 enrolment, we will perform exploratory analyses examining additional potential effect  
27  
28 modifiers that are intended to represent patient physiology at baseline, but which are  
29  
30 collected between enrolment and induction and therefore have the theoretical potential  
31  
32 to be affected by study group assignment. These include:  
33  
34

- 35 1. Receipt of positive pressure ventilation for pre-oxygenation (via either non-
- 36
- 37 invasive mechanical ventilation or bag-mask ventilation) (yes/no);
- 38
- 39
- 40 2. Choice of sedative medication (etomidate, ketamine, propofol, other);
- 41
- 42
- 43 3. New or increased vasopressor administration prior to or with induction
- 44
- 45 (yes/no);
- 46
- 47 4. SBP at induction (continuous variable in mm Hg)
- 48
- 49 5. Oxygen saturation at induction (continuous variable in %)
- 50
- 51
- 52
- 53
- 54
- 55
- 56
- 57
- 58
- 59
- 60

1  
2  
3 Finally, to examine our assumption that no interaction will exist between the  
4 interventions evaluated in the PREPARE II and BOUGIE trials, among patients co-  
5 enrolled to these trials, we will examine whether BOUGIE group assignment modifies  
6 the primary outcome. If, contrary to our expectation, an interaction is confirmed (based  
7 on criteria listed above for interaction testing), the BOUGIE group assignment will be  
8 added to the adjustment model for the primary outcome of cardiovascular collapse.  
9  
10  
11  
12  
13  
14  
15  
16  
17  
18

### 19 *Analysis of the Secondary Outcome*

20  
21 The sole secondary outcome of 28-day in-hospital mortality will be compared  
22 between patients randomized to the fluid bolus group versus patients randomized to the  
23 no fluid bolus group using an unadjusted chi-squared test.  
24  
25  
26  
27  
28  
29

### 30 *Analyses of Exploratory Outcomes*

31  
32 All pre-specified exploratory outcomes will be compared between patients  
33 randomized to the fluid bolus group versus patients randomized to the no fluid bolus  
34 group. Continuous outcomes will be compared with the Mann-Whitney U test and  
35 categorical variables with the chi-square test. In a sensitivity analysis using data only  
36 from each patient's first tracheal intubation in the PREPARE II dataset, we will compare  
37 the fluid group to the no fluid bolus group with regard to in-hospital mortality, ventilator-  
38 free days, and ICU-free days.  
39  
40  
41  
42  
43  
44  
45  
46  
47  
48  
49

### 50 *Handling of Missing Data*

51  
52  
53 Although we have allowed for up to 5% missingness in our power calculation, we  
54 do not anticipate that data for the primary outcome of cardiovascular collapse will be  
55  
56  
57  
58  
59  
60

1  
2  
3 missing for any patients. Missing data will not be imputed for the primary or secondary  
4  
5 outcome. In adjusted analyses, missing data for covariates may be imputed using a  
6  
7 multiple imputation technique.  
8  
9

### 10 11 12 *Corrections for Multiple Testing* 13

14 We pre-specify a single primary analysis of a single primary outcome, and a  
15  
16 single secondary analysis with one outcome. All additional analyses are deemed  
17  
18 hypothesis-generating, and no corrections for multiple comparisons will be performed.  
19  
20  
21  
22

### 23 24 *Trial Status* 25

26 The Preventing cardiovascular collapse with Administration of fluid Resuscitation  
27  
28 during Induction and Intubation (PREPARE II) trial is a pragmatic, prospective, multi-  
29  
30 center, non-blinded randomized clinical trial comparing fluid bolus to no fluid bolus  
31  
32 during tracheal intubation of critically ill adults. Patient enrolment began on February 1,  
33  
34 2019 and is expected to be completed in June, 2020.  
35  
36  
37  
38  
39

### 40 **Ethics and Dissemination** 41

#### 42 *Informed Consent* 43

44 In current clinical practice, initiating an intravenous fluid bolus beginning prior to  
45  
46 tracheal intubation and not administering an intravenous fluid bolus beginning prior to  
47  
48 tracheal intubation are both common management approaches, with significant variation  
49  
50 between providers<sup>15</sup>. All patients eligible for this trial would have either received or not  
51  
52 received an intravenous fluid bolus for tracheal intubation as a part of their clinical care,  
53  
54  
55  
56  
57  
58  
59

1  
2  
3 regardless of participation in the trial. To be eligible for the trial, patients' treating  
4  
5 clinicians must feel that initiation of a new fluid bolus for tracheal intubation is neither  
6  
7 required nor contraindicated for the patient's optimal care. The protocol states that a  
8  
9 fluid bolus can be given or withheld for patient safety at any time in the study,  
10  
11 regardless of group assignment. For these reasons, the trial is felt to pose minimal  
12  
13 incremental risk compared with the clinical care patients would receive outside of the  
14  
15 trial.  
16  
17

18  
19 Tracheal intubation of critically ill adults is commonly an urgent or emergent  
20  
21 procedure for which obtaining informed consent for the clinical procedure or informed  
22  
23 consent for research is impracticable.  
24  
25

26 This information was provided to either the central institutional review board at  
27  
28 Vanderbilt University Medical Center or the local institutional review board at each trial  
29  
30 site (see [Supplemental file 1, section 2](#)), and the trial was approved with a waiver of  
31  
32 informed consent.  
33  
34  
35  
36  
37

### 38 *Information for Patients and Families*

39  
40 Information regarding the study is made available to patients and families  
41  
42 through three mechanisms: (1) a patient and family notification sheet provided to each  
43  
44 patient and family following enrolment informing the patient of his or her enrolment and  
45  
46 describing the study, (2) a patient and family information sheet containing general  
47  
48 information about the study and contact information for the research team displayed in  
49  
50 at least three publicly-visible locations within the study unit, (3) a patient and family  
51  
52 information sheet containing general study information and contact information for the  
53  
54  
55  
56  
57  
58  
59  
60

1  
2  
3 research team provided to each patient and family at the time of admission to the study  
4  
5 unit. The mechanism(s) of providing information to patients and families used by each  
6  
7 study site was determined by local site investigators and local IRBs and is described in  
8  
9  
10 **Supplemental file 1, section 2; Table S1.**

### 11 12 13 14 *Protocol Changes*

15  
16  
17 Any changes to the trial protocol will be recorded on ClinicalTrials.Gov as per  
18  
19 SPIRIT guidelines. See **Supplemental file 1, section 9** for more details.  
20  
21

### 22 23 24 *Data Handling*

25  
26 For details of privacy and data handling, see **Supplemental file 1, section 10.**  
27  
28

### 29 30 31 *Dissemination Plan*

32  
33 Trial results will be submitted to a peer-reviewed journal for consideration of  
34  
35 publication and will be presented at scientific conferences.  
36  
37

### 38 39 40 **Figure Legends**

41  
42  
43  
44 **Figure 1:** Timeline of tracheal intubation (TI), enrolment, study interventions, and  
45  
46 primary/secondary outcome eligibility in an enrolled patient.  
47  
48

### 49 50 **# List of PREPARE II Investigators**

51 Wake Forest School of Medicine— Kevin W. Gibbs, MD\*\*\*; Simanta Dutta, MD\*\*\*; Stephen  
52 P Peters MD, PhD\*; Muhammad Ali, MBBS\*; Rita N. Bakhru, MD, MS\*; Scott Bauer, ANP-  
53 BC\*; Christina R. Bellinger, MD\*; Amanda M. Brown, PA-C\*; Blair Brown, MD\*; Jerri Brown,  
54 ADN, RN\*; Caitlin Bumgarner, ACGNP\*; Wendy Butcher, RN, BSN\*; Megan Caudle,  
55 ACGNP\*; Arjun B. Chatterjee, MD\*; David J. Chodos, MD\*; Gerardo Corcino, RN, BSN\*;  
56  
57  
58  
59

1  
 2  
 3 Nathan S. Cutler, MD\*; Travis L. Dotson, MD\*; Daniel C. Files, MD\*; Jonathan L Forbes,  
 4 DO\*; John P. Gaillard, MD\*; Katherine A. Gershner, DO\*; Shannon Ginty, PA-C\*; Kiadrick R.  
 5 Hood, RN, MSN, CMSRN\*; April Hazelwood, ADN, RN\*; Katherine Hendricks, FNP\*; Kelly  
 6 Jacobus, PA-C\*; Jonathan T. Jaffe, MD\*; Stacy Kay, ACGNP\*; Chad A. Kloefkorn, MD\*;  
 7 Jennifer Krall, MD\*; Margo T. Lannan, MD\*; Cornelia Lane, ACGNP\*; Cynthia Lanning, BSN,  
 8 RN\*; Jessica Lyons, PA-C\*; William I. Mariencheck Jr., MD\*; Chad R. Marion, DO, PhD\*;  
 9 Matthew A. Maslonka, MD\*; Sara McClintock, ACGNP\*; Nathaniel M. Meier, MD\*; Matthew  
 10 C. Miles, MD, MEd\*; Peter J. Miller, MD\*; Sophia Mitchell, PA-C\*; Wendy C. Moore, MD\*;  
 11 Katherine Moss, PA-C\*; Andrew M. Namen, MD\*; Dustin L. Norton, MD\*; Stella B. Ogake,  
 12 MD\*; Jill A. Ohar, MD\*; Victor E. Ortega, MD, PhD\*; Jessica A. Palakshappa, MD, MS\*;  
 13 Rodolfo M. Pascual, MD\*; Sandi Pascual, ANP-BC\*; Aaron Pickens, MD\*; Adam R Schertz,  
 14 MD\*; Matt Strong, ADN, RN\*; Alexander O. Sy, MD\*; Braghadheeswar Thyagarajan MD\*;  
 15 Amy Townsend, ACGNP\*; Russell Worthen, FNP-BC\*; Michael Wlodarski, PA-C\*; Charles  
 16 Yarbrough, ADN, RN\*; Caroline York, PA-C\*; Vanderbilt University Medical Center—  
 17 Jonathan D. Casey, MD, MSc\*\*\*; Janna S. Landsperger, MSN\*\*\*; Li Wang, MS\*\*\*;  
 18 Christopher J. Lindsell PhD\*\*\*; Todd W. Rice, MD, MSc\*\*\*; Matthew W. Semler, MD,  
 19 MSc\*\*\*; Wesley H. Self, MD, MPH\*\*\*; Bradley Lloyd, RRT-ACCS\*; Lahey Hospital and  
 20 Medical Center— James Dargin, MD\*\*\*; Joanne Wozniak, PA-C\*\*\*; Susan Stempek, PA-  
 21 C\*\*\*; Christopher Adler, PA-C\*; Ahmed Agameya, MD\*; Michael Colancecco, DO\*; Daniel  
 22 Fitelson, MD\*; Joshua Giaccotto, MD\*; Gena Han, DO\*; Louise Kane, MD\*; Ezra Miller,  
 23 MD\*; Timothy Noland, PA-C\*; Jaqueline Price, PA-C\*; Joseph Plourde, PA-C\*; Emily Adams,  
 24 PA-C\*; Fraser Mackay, MD\*; Laura Mahoney, PA-C\*; Avignat Patel, MD\*; Michael Plourde,  
 25 PA-C\*; Zena Saadeh, PA-C\*; Sara Shadchehr, DO\*; Sandeep Somalaraju, MD\*; Eleanor  
 26 Summerhill, MD\*; Ryan Webster, MD\*; Jordan Winnicki, PA-C\*; Ekaterina Yavarovich, DO\*;  
 27 University of Alabama at Birmingham Medical Center— Derek W. Russell, MD\*\*\*; Sarah W.  
 28 Robison, MD\*\*\*; Sheetal Gandotra, MD\*\*; Swati Gulati, MBBS, MS\*\*; Anna Altz-Stamm RN,  
 29 BSN, CCRN\*; Cristina Bardita, MD, PhD\* ; Mary Clay Boone RN, BSN\*; Joe W. Chiles III,  
 30 MD\*; Kristina Collins RN, BSN\*; Abby Drescher RN, BSN\*; Kevin G. Dsouza, MD\*; Janna  
 31 Dunn, RN, AND\*; Stacy Ejem, MD\*; Josh Gautney, MD\*; Nicole Harris, RN, ADN\*; Savannah  
 32 Herder, RN, BSN\*; Tamer Hudali, MD, MPH\*; R. Chad Wade, MD\*; Rutwij Joshi, MBBS\*;  
 33 Daniel Kelmenson, MD\*; Anne Merrill Mason RN, BSN\*; Scott R. Merriman, MD\*; Takudzwa  
 34 Mkorombindo, MD\*; Megan Moore, RN, MSN\*; Jada Nowak, RN, BSN\*; Kate O'Connor,  
 35 DO\*; David B. Page, MD\*; Sheylan D. Patel, MD\*; G. Bruno Pereira, MD, PhD\*; Lisa Sarratt  
 36 RN, BSN\*; Tabitha Stewart RN, BSN\*; William S. Stigler, MD\*; Kadambari Vijaykumar,  
 37 MBBS\*; Gina White RN, BSN\*; Micah R. Whitson, MD\*; Ochsner Health System New  
 38 Orleans— Derek J. Vonderhaar, MD\*\*\*; Kevin M. Dischert MD\*\*; University of Washington  
 39 Harborview Medical Center— Aaron M. Joffe, DO\*\*\*; Itay Bentov, MD, PhD\*\*\*; Christopher  
 40 Barnes\*\*; Andrew M. Walters\*\*; Baylor Scott & White Medical Center— Shekhar Ghamande,  
 41 MD\*\*\*; Heath D. White, DO, MS\*\*\*; Alejandro C. Arroliga, MD, MS\*\*; Tasnim Lat, DO\*\*;  
 42 Oregon Health and Science University School of Medicine— Akram Khan, MD\*\*\*; Olivia F.  
 43 Krol, BS\*\*\*; Stephanie Nonas, MD\*\*; Milad K. Jouzestani\*\*; Raya Adi\*; Chandani  
 44 Anandkat\*; Hanae Benchbani, MD\*; Matthew G. Drake, MD\*; Makrina N. Kamel, BS\*;  
 45 Ramanpreet Randhawa, MD\*; Jessica L. Tsui, MD\*; Hennepin County Medical Center—  
 46 Matthew E. Prekker, MD\*\*\*; Brian E. Driver, MD\*\*\*; University of Mississippi Medical  
 47 Center— Joseph M. Brewer, DO\*\*\*; Louisiana State University School of Medicine—David R.  
 48 Janz, MD, MSc\*\*\*



1  
2  
3 \*\*\*Denotes an author listed on the byline.

4 \*\*Denotes an author not listed on the byline due to space considerations.

5 \*Denotes a collaborator  
6  
7

## 8 9 **Bibliography:**

- 10 1. Simpson GD, Ross MJ, McKeown DW, et al. Tracheal intubation in the critically ill: a multi-  
11 centre national study of practice and complications. *Br J Anaesth* 2012;108(5):792-9. doi:  
12 10.1093/bja/aer504
- 13 2. Martin LD, Mhyre JM, Shanks AM, et al. 3,423 emergency tracheal intubations at a university  
14 hospital: airway outcomes and complications. *Anesthesiology* 2011;114(1):42-8. doi:  
15 10.1097/ALN.0b013e318201c415
- 16 3. Leibowitz AB. Tracheal intubation in the intensive care unit: extremely hazardous even in the  
17 best of hands. *Crit Care Med* 2006;34(9):2497-8. doi:  
18 10.1097/01.CCM.0000235993.47514.8F
- 19 4. Jaber S, Jung B, Corne P, et al. An intervention to decrease complications related to  
20 endotracheal intubation in the intensive care unit: a prospective, multiple-center study.  
21 *Intensive Care Med* 2010;36(2):248-55. doi: 10.1007/s00134-009-1717-8
- 22 5. Green RS, Turgeon AF, McIntyre LA, et al. Postintubation hypotension in intensive care unit  
23 patients: A multicenter cohort study. *J Crit Care* 2015;30(5):1055-60. doi:  
24 10.1016/j.jcrc.2015.06.007
- 25 6. Ferrada P, Manzano-Nunez R, Lopez-Castilla V, et al. Meta-Analysis of Post-Intubation  
26 Hypotension: A Plea to Consider Circulation First in Hypovolemic Patients. *Am Surg*  
27 2019;85(2):167-72.
- 28 7. Perbet S, De Jong A, Delmas J, et al. Incidence of and risk factors for severe cardiovascular  
29 collapse after endotracheal intubation in the ICU: a multicenter observational study. *Crit*  
30 *Care* 2015;19:257. doi: 10.1186/s13054-015-0975-9
- 31 8. Janz DR, Casey JD, Semler MW, et al. Effect of a fluid bolus on cardiovascular collapse  
32 among critically ill adults undergoing tracheal intubation (PrePARE): a randomised  
33 controlled trial. *Lancet Respir Med* 2019 doi: 10.1016/S2213-2600(19)30246-2
- 34 9. Heffner AC, Swords DS, Nussbaum ML, et al. Predictors of the complication of  
35 postintubation hypotension during emergency airway management. *J Crit Care*  
36 2012;27(6):587-93. doi: 10.1016/j.jcrc.2012.04.022
- 37 10. Higgs A, McGrath BA, Goddard C, et al. Guidelines for the management of tracheal  
38 intubation in critically ill adults. *Br J Anaesth* 2018;120(2):323-52. doi:  
39 10.1016/j.bja.2017.10.021
- 40 11. Casey JD, Janz DR, Russell DW, et al. Bag-Mask Ventilation during Tracheal Intubation of  
41 Critically Ill Adults. *N Engl J Med* 2019;380(9):811-21. doi: 10.1056/NEJMoa1812405
- 42 12. Baillard C, Prat G, Jung B, et al. Effect of preoxygenation using non-invasive ventilation  
43 before intubation on subsequent organ failures in hypoxaemic patients: a randomised  
44 clinical trial. *Br J Anaesth* 2018;120(2):361-67. doi: 10.1016/j.bja.2017.11.067  
45 [published Online First: 2018/02/07]
- 46 13. Chan AW, Tetzlaff JM, Gotzsche PC, et al. SPIRIT 2013 explanation and elaboration:  
47 guidance for protocols of clinical trials. *BMJ* 2013;346:e7586. doi: 10.1136/bmj.e7586  
48  
49  
50  
51  
52  
53  
54  
55  
56  
57  
58  
59  
60



- 1  
2  
3 14. Cagney DN, Sul J, Huang RY, et al. The FDA NIH Biomarkers, EndpointS, and other Tools  
4 (BEST) resource in neuro-oncology. *Neuro Oncol* 2018;20(9):1162-72. doi:  
5 10.1093/neuonc/nox242  
6  
7 15. Green RS, Fergusson DA, Turgeon AF, et al. Resuscitation Prior to Emergency Endotracheal  
8 Intubation: Results of a National Survey. *West J Emerg Med* 2016;17(5):542-8. doi:  
9 10.5811/westjem.2016.6.30503  
10  
11  
12  
13  
14  
15  
16  
17  
18  
19  
20  
21  
22  
23  
24  
25  
26  
27  
28  
29  
30  
31  
32  
33  
34  
35  
36  
37  
38  
39  
40  
41  
42  
43  
44  
45  
46  
47  
48  
49  
50  
51  
52  
53  
54  
55  
56  
57  
58  
59  
60

1  
2  
3  
4  
5  
6  
7  
8  
9  
10  
11  
12  
13  
14  
15  
16  
17  
18  
19  
20  
21  
22  
23  
24  
25  
26  
27  
28  
29  
30  
31  
32  
33  
34  
35  
36  
37  
38  
39  
40  
41



Figure 1

1  
2  
3  
4  
5  
6  
7  
8  
9  
10  
11  
12  
13  
14  
15  
16  
17  
18  
19  
20  
21  
22  
23  
24  
25  
26  
27  
28  
29  
30  
31  
32  
33  
34  
35  
36  
37  
38  
39  
40  
41  
42  
43  
44  
45  
46  
47  
48  
49  
50  
51  
52  
53  
54  
55  
56  
57  
58  
59  
60

**Supplementary file to:**

**Protocol and statistical analysis plan for the PREventing cardiovascular collaPse  
with Administration of fluid REsuscitation during Induction and Intubation  
(PREPARE II) randomized clinical trial**

For peer review only

## Table of Contents

1. SPIRIT 2013 Checklist
2. Site Characteristics
3. Randomization Assignment Sheets
4. Data Collection
5. Definition of 28-day In-hospital Mortality
6. Definition of Ventilator Free Days (VFDs)
7. Definition of ICU-Free Days (ICU-FDs)
8. Definition of “days from enrolment to in-hospital death”
9. Plan for communication of protocol changes
10. Patient Privacy and Data Storage
11. References

## 1. SPIRIT 2013 Checklist

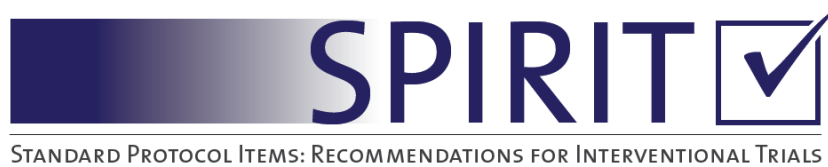

SPIRIT 2013 Checklist: Recommended items to address in a clinical trial protocol and related documents\*

| Section/item                      | Item No | Description                                                                                                                                                                                                                                                                              | Addressed on page number |
|-----------------------------------|---------|------------------------------------------------------------------------------------------------------------------------------------------------------------------------------------------------------------------------------------------------------------------------------------------|--------------------------|
| <b>Administrative information</b> |         |                                                                                                                                                                                                                                                                                          |                          |
| Title                             | 1       | Descriptive title identifying the study design, population, interventions, and, if applicable, trial acronym                                                                                                                                                                             | <u>1,10-12</u>           |
| Trial registration                | 2a      | Trial identifier and registry name. If not yet registered, name of intended registry                                                                                                                                                                                                     | <u>5</u>                 |
|                                   | 2b      | All items from the World Health Organization Trial Registration Data Set                                                                                                                                                                                                                 | <u>1-5,</u>              |
| Protocol version                  | 3       | Date and version identifier                                                                                                                                                                                                                                                              | <u>N/A</u>               |
| Funding                           | 4       | Sources and types of financial, material, and other support                                                                                                                                                                                                                              | <u>2</u>                 |
| Roles and responsibilities        | 5a      | Names, affiliations, and roles of protocol contributors                                                                                                                                                                                                                                  | <u>1,2</u>               |
|                                   | 5b      | Name and contact information for the trial sponsor                                                                                                                                                                                                                                       | <u>2</u>                 |
|                                   | 5c      | Role of study sponsor and funders, if any, in study design; collection, management, analysis, and interpretation of data; writing of the report; and the decision to submit the report for publication, including whether they will have ultimate authority over any of these activities | <u>2</u>                 |

|    |                                                                                                                                                                                                                                                                  |                       |
|----|------------------------------------------------------------------------------------------------------------------------------------------------------------------------------------------------------------------------------------------------------------------|-----------------------|
| 5d | Composition, roles, and responsibilities of the coordinating centre, steering committee, endpoint adjudication committee, data management team, and other individuals or groups overseeing the trial, if applicable (see Item 21a for data monitoring committee) | <u>1,2, 9,10, 24,</u> |
|----|------------------------------------------------------------------------------------------------------------------------------------------------------------------------------------------------------------------------------------------------------------------|-----------------------|

## Introduction

|                          |    |                                                                                                                                                                                                           |                |
|--------------------------|----|-----------------------------------------------------------------------------------------------------------------------------------------------------------------------------------------------------------|----------------|
| Background and rationale | 6a | Description of research question and justification for undertaking the trial, including summary of relevant studies (published and unpublished) examining benefits and harms for each intervention        | <u>7,8, 13</u> |
|                          | 6b | Explanation for choice of comparators                                                                                                                                                                     | <u>7,8</u>     |
| Objectives               | 7  | Specific objectives or hypotheses                                                                                                                                                                         | <u>8</u>       |
| Trial design             | 8  | Description of trial design including type of trial (eg, parallel group, crossover, factorial, single group), allocation ratio, and framework (eg, superiority, equivalence, noninferiority, exploratory) | <u>9</u>       |

## Methods: Participants, interventions, and outcomes

|                      |     |                                                                                                                                                                                                |               |
|----------------------|-----|------------------------------------------------------------------------------------------------------------------------------------------------------------------------------------------------|---------------|
| Study setting        | 9   | Description of study settings (eg, community clinic, academic hospital) and list of countries where data will be collected. Reference to where list of study sites can be obtained             | <u>9,10</u>   |
| Eligibility criteria | 10  | Inclusion and exclusion criteria for participants. If applicable, eligibility criteria for study centers and individuals who will perform the interventions (eg, surgeons, psychotherapists)   | <u>10</u>     |
| Interventions        | 11a | Interventions for each group with sufficient detail to allow replication, including how and when they will be administered                                                                     | <u>10-12,</u> |
|                      | 11b | Criteria for discontinuing or modifying allocated interventions for a given trial participant (eg, drug dose change in response to harms, participant request, or improving/worsening disease) | <u>12,13</u>  |
|                      | 11c | Strategies to improve adherence to intervention protocols, and any procedures for monitoring adherence (eg, drug tablet return, laboratory tests)                                              | <u>12-14</u>  |

|                      |     |                                                                                                                                                                                                                                                                                                                                                                                |                          |
|----------------------|-----|--------------------------------------------------------------------------------------------------------------------------------------------------------------------------------------------------------------------------------------------------------------------------------------------------------------------------------------------------------------------------------|--------------------------|
|                      | 11d | Relevant concomitant care and interventions that are permitted or prohibited during the trial                                                                                                                                                                                                                                                                                  | <u>12-14</u>             |
| Outcomes             | 12  | Primary, secondary, and other outcomes, including the specific measurement variable (eg, systolic blood pressure), analysis metric (eg, change from baseline, final value, time to event), method of aggregation (eg, median, proportion), and time point for each outcome. Explanation of the clinical relevance of chosen efficacy and harm outcomes is strongly recommended | <u>13-15</u>             |
| Participant timeline | 13  | Time schedule of enrolment, interventions (including any run-ins and washouts), assessments, and visits for participants. A schematic diagram is highly recommended (see Figure)                                                                                                                                                                                               | <u>Figure 1, Table 1</u> |
| Sample size          | 14  | Estimated number of participants needed to achieve study objectives and how it was determined, including clinical and statistical assumptions supporting any sample size calculations                                                                                                                                                                                          | <u>15-17</u>             |
| Recruitment          | 15  | Strategies for achieving adequate participant enrollment to reach target sample size                                                                                                                                                                                                                                                                                           | <u>10-13</u>             |

### Methods: Assignment of interventions (for controlled trials)

#### Allocation:

|                                  |     |                                                                                                                                                                                                                                                                                                                                                             |                       |
|----------------------------------|-----|-------------------------------------------------------------------------------------------------------------------------------------------------------------------------------------------------------------------------------------------------------------------------------------------------------------------------------------------------------------|-----------------------|
| Sequence generation              | 16a | Method of generating the allocation sequence (eg, computer-generated random numbers), and list of any factors for stratification. To reduce predictability of a random sequence, details of any planned restriction (e.g., blocking) should be provided in a separate document that is unavailable to those who enroll participants or assign interventions | <u>10</u>             |
| Allocation concealment mechanism | 16b | Mechanism of implementing the allocation sequence (e.g., central telephone; sequentially numbered, opaque, sealed envelopes), describing any steps to conceal the sequence until interventions are assigned                                                                                                                                                 | <u>11,12, Fig. S1</u> |
| Implementation                   | 16c | Who will generate the allocation sequence, who will enroll participants, and who will assign participants to interventions                                                                                                                                                                                                                                  | <u>11-13</u>          |

|                                 |                       |     |                                                                                                                                                      |            |
|---------------------------------|-----------------------|-----|------------------------------------------------------------------------------------------------------------------------------------------------------|------------|
| 1<br>2<br>3<br>4<br>5<br>6<br>7 | Blinding<br>(masking) | 17a | Who will be blinded after assignment to interventions (eg, trial participants, care providers, outcome assessors, data analysts), and how            | <u>10</u>  |
| 8<br>9<br>10<br>11<br>12<br>13  |                       | 17b | If blinded, circumstances under which unblinding is permissible, and procedure for revealing a participant's allocated intervention during the trial | <u>N/A</u> |

#### Methods: Data collection, management, and analysis

|                                                                      |                               |     |                                                                                                                                                                                                                                                                                                                                                                                                              |                                         |
|----------------------------------------------------------------------|-------------------------------|-----|--------------------------------------------------------------------------------------------------------------------------------------------------------------------------------------------------------------------------------------------------------------------------------------------------------------------------------------------------------------------------------------------------------------|-----------------------------------------|
| 14<br>15<br>16<br>17<br>18<br>19<br>20<br>21<br>22<br>23<br>24<br>25 | Data<br>collection<br>methods | 18a | Plans for assessment and collection of outcome, baseline, and other trial data, including any related processes to promote data quality (eg, duplicate measurements, training of assessors) and a description of study instruments (eg, questionnaires, laboratory tests) along with their reliability and validity, if known. Reference to where data collection forms can be found, if not in the protocol | <u>12-22,<br/>Supplement 15-<br/>17</u> |
| 26<br>27<br>28<br>29<br>30                                           |                               | 18b | Plans to promote participant retention and complete follow-up, including list of any outcome data to be collected for participants who discontinue or deviate from intervention protocols                                                                                                                                                                                                                    | <u>12-14,<br/>Supplement<br/>14</u>     |
| 31<br>32<br>33<br>34<br>35<br>36<br>37                               | Data<br>managemen<br>t        | 19  | Plans for data entry, coding, security, and storage, including any related processes to promote data quality (eg, double data entry; range checks for data values). Reference to where details of data management procedures can be found, if not in the protocol                                                                                                                                            | <u>Supplement 14</u>                    |
| 38<br>39<br>40<br>41<br>42<br>43<br>44<br>45<br>46                   | Statistical<br>methods        | 20a | Statistical methods for analyzing primary and secondary outcomes. Reference to where other details of the statistical analysis plan can be found, if not in the protocol                                                                                                                                                                                                                                     | <u>18, 22</u>                           |
| 47<br>48<br>49<br>50<br>51                                           |                               | 20b | Methods for any additional analyses (eg, subgroup and adjusted analyses)                                                                                                                                                                                                                                                                                                                                     | <u>18-23</u>                            |
| 52<br>53<br>54<br>55<br>56<br>57                                     |                               | 20c | Definition of analysis population relating to protocol non-adherence (eg, as randomized analysis), and any statistical methods to handle missing data (eg, multiple imputation)                                                                                                                                                                                                                              | <u>18, 22</u>                           |

#### Methods: Monitoring



|    |                                 |     |                                                                                                                                                                                                                                                                                                                                       |                                                  |
|----|---------------------------------|-----|---------------------------------------------------------------------------------------------------------------------------------------------------------------------------------------------------------------------------------------------------------------------------------------------------------------------------------------|--------------------------------------------------|
| 1  |                                 |     |                                                                                                                                                                                                                                                                                                                                       |                                                  |
| 2  |                                 |     |                                                                                                                                                                                                                                                                                                                                       |                                                  |
| 3  |                                 |     |                                                                                                                                                                                                                                                                                                                                       |                                                  |
| 4  | Data                            | 21a | Composition of data monitoring committee (DMC); summary of its role and reporting structure; statement of whether it is independent from the sponsor and competing interests; and reference to where further details about its charter can be found, if not in the protocol. Alternatively, an explanation of why a DMC is not needed | <u>16, 17</u>                                    |
| 5  | monitoring                      |     |                                                                                                                                                                                                                                                                                                                                       |                                                  |
| 6  |                                 |     |                                                                                                                                                                                                                                                                                                                                       |                                                  |
| 7  |                                 |     |                                                                                                                                                                                                                                                                                                                                       |                                                  |
| 8  |                                 |     |                                                                                                                                                                                                                                                                                                                                       |                                                  |
| 9  |                                 |     |                                                                                                                                                                                                                                                                                                                                       |                                                  |
| 10 |                                 |     |                                                                                                                                                                                                                                                                                                                                       |                                                  |
| 11 |                                 |     |                                                                                                                                                                                                                                                                                                                                       |                                                  |
| 12 |                                 | 21b | Description of any interim analyses and stopping guidelines, including who will have access to these interim results and make the final decision to terminate the trial                                                                                                                                                               | <u>16,17</u>                                     |
| 13 |                                 |     |                                                                                                                                                                                                                                                                                                                                       |                                                  |
| 14 |                                 |     |                                                                                                                                                                                                                                                                                                                                       |                                                  |
| 15 |                                 |     |                                                                                                                                                                                                                                                                                                                                       |                                                  |
| 16 | Harms                           | 22  | Plans for collecting, assessing, reporting, and managing solicited and spontaneously reported adverse events and other unintended effects of trial interventions or trial conduct                                                                                                                                                     | <u>16, 17</u>                                    |
| 17 |                                 |     |                                                                                                                                                                                                                                                                                                                                       |                                                  |
| 18 |                                 |     |                                                                                                                                                                                                                                                                                                                                       |                                                  |
| 19 |                                 |     |                                                                                                                                                                                                                                                                                                                                       |                                                  |
| 20 |                                 |     |                                                                                                                                                                                                                                                                                                                                       |                                                  |
| 21 | Auditing                        | 23  | Frequency and procedures for auditing trial conduct, if any, and whether the process will be independent from investigators and the sponsor                                                                                                                                                                                           | <u>16,17</u>                                     |
| 22 |                                 |     |                                                                                                                                                                                                                                                                                                                                       |                                                  |
| 23 |                                 |     |                                                                                                                                                                                                                                                                                                                                       |                                                  |
| 24 |                                 |     |                                                                                                                                                                                                                                                                                                                                       |                                                  |
| 25 |                                 |     |                                                                                                                                                                                                                                                                                                                                       |                                                  |
| 26 |                                 |     |                                                                                                                                                                                                                                                                                                                                       |                                                  |
| 27 | <b>Ethics and dissemination</b> |     |                                                                                                                                                                                                                                                                                                                                       |                                                  |
| 28 | Research ethics                 | 24  | Plans for seeking research ethics committee/institutional review board (REC/IRB) approval                                                                                                                                                                                                                                             | <u>24</u>                                        |
| 29 | approval                        |     |                                                                                                                                                                                                                                                                                                                                       |                                                  |
| 30 |                                 |     |                                                                                                                                                                                                                                                                                                                                       |                                                  |
| 31 |                                 |     |                                                                                                                                                                                                                                                                                                                                       |                                                  |
| 32 | Protocol                        | 25  | Plans for communicating important protocol modifications (eg, changes to eligibility criteria, outcomes, analyses) to relevant parties (eg, investigators, REC/IRBs, trial participants, trial registries, journals, regulators)                                                                                                      | <u>25,</u><br><u>Supplement 13,</u><br><u>14</u> |
| 33 | amendments                      |     |                                                                                                                                                                                                                                                                                                                                       |                                                  |
| 34 |                                 |     |                                                                                                                                                                                                                                                                                                                                       |                                                  |
| 35 |                                 |     |                                                                                                                                                                                                                                                                                                                                       |                                                  |
| 36 |                                 |     |                                                                                                                                                                                                                                                                                                                                       |                                                  |
| 37 |                                 |     |                                                                                                                                                                                                                                                                                                                                       |                                                  |
| 38 | Consent or                      | 26a | Who will obtain informed consent or assent from potential trial participants or authorized surrogates, and how (see Item 32)                                                                                                                                                                                                          | <u>23,24</u>                                     |
| 39 | assent                          |     |                                                                                                                                                                                                                                                                                                                                       |                                                  |
| 40 |                                 |     |                                                                                                                                                                                                                                                                                                                                       |                                                  |
| 41 |                                 |     |                                                                                                                                                                                                                                                                                                                                       |                                                  |
| 42 |                                 |     |                                                                                                                                                                                                                                                                                                                                       |                                                  |
| 43 |                                 | 26b | Additional consent provisions for collection and use of participant data and biological specimens in ancillary studies, if applicable                                                                                                                                                                                                 | <u>N/A</u>                                       |
| 44 |                                 |     |                                                                                                                                                                                                                                                                                                                                       |                                                  |
| 45 |                                 |     |                                                                                                                                                                                                                                                                                                                                       |                                                  |
| 46 |                                 |     |                                                                                                                                                                                                                                                                                                                                       |                                                  |
| 47 |                                 |     |                                                                                                                                                                                                                                                                                                                                       |                                                  |
| 48 | Confidentiality                 | 27  | How personal information about potential and enrolled participants will be collected, shared, and maintained in order to protect confidentiality before, during, and after the trial                                                                                                                                                  | <u>Supplement 14</u>                             |
| 49 |                                 |     |                                                                                                                                                                                                                                                                                                                                       |                                                  |
| 50 |                                 |     |                                                                                                                                                                                                                                                                                                                                       |                                                  |
| 51 |                                 |     |                                                                                                                                                                                                                                                                                                                                       |                                                  |
| 52 |                                 |     |                                                                                                                                                                                                                                                                                                                                       |                                                  |
| 53 | Declaration of                  | 28  | Financial and other competing interests for principal investigators for the overall trial and each study site                                                                                                                                                                                                                         | <u>2</u>                                         |
| 54 | interests                       |     |                                                                                                                                                                                                                                                                                                                                       |                                                  |
| 55 |                                 |     |                                                                                                                                                                                                                                                                                                                                       |                                                  |
| 56 |                                 |     |                                                                                                                                                                                                                                                                                                                                       |                                                  |
| 57 |                                 |     |                                                                                                                                                                                                                                                                                                                                       |                                                  |
| 58 |                                 |     |                                                                                                                                                                                                                                                                                                                                       |                                                  |
| 59 |                                 |     |                                                                                                                                                                                                                                                                                                                                       |                                                  |
| 60 |                                 |     |                                                                                                                                                                                                                                                                                                                                       |                                                  |

|    |                               |     |                                                                                                                                                                                                                                                                                       |
|----|-------------------------------|-----|---------------------------------------------------------------------------------------------------------------------------------------------------------------------------------------------------------------------------------------------------------------------------------------|
| 1  |                               |     |                                                                                                                                                                                                                                                                                       |
| 2  |                               |     |                                                                                                                                                                                                                                                                                       |
| 3  |                               |     |                                                                                                                                                                                                                                                                                       |
| 4  | Access to data                | 29  | Statement of who will have access to the final trial dataset, and disclosure of contractual agreements that limit such access for investigators                                                                                                                                       |
| 5  |                               |     |                                                                                                                                                                                                                                                                                       |
| 6  |                               |     |                                                                                                                                                                                                                                                                                       |
| 7  |                               |     |                                                                                                                                                                                                                                                                                       |
| 8  | Ancillary and post-trial care | 30  | Provisions, if any, for ancillary and post-trial care, and for compensation to those who suffer harm from trial participation                                                                                                                                                         |
| 9  |                               |     |                                                                                                                                                                                                                                                                                       |
| 10 |                               |     |                                                                                                                                                                                                                                                                                       |
| 11 |                               |     |                                                                                                                                                                                                                                                                                       |
| 12 |                               |     |                                                                                                                                                                                                                                                                                       |
| 13 | Dissemination policy          | 31a | Plans for investigators and sponsor to communicate trial results to participants, healthcare professionals, the public, and other relevant groups (e.g., via publication, reporting in results databases, or other data sharing arrangements), including any publication restrictions |
| 14 |                               |     |                                                                                                                                                                                                                                                                                       |
| 15 |                               |     |                                                                                                                                                                                                                                                                                       |
| 16 |                               |     |                                                                                                                                                                                                                                                                                       |
| 17 |                               |     |                                                                                                                                                                                                                                                                                       |
| 18 |                               |     |                                                                                                                                                                                                                                                                                       |
| 19 |                               |     |                                                                                                                                                                                                                                                                                       |
| 20 |                               | 31b | Authorship eligibility guidelines and any intended use of professional writers                                                                                                                                                                                                        |
| 21 |                               |     |                                                                                                                                                                                                                                                                                       |
| 22 |                               |     |                                                                                                                                                                                                                                                                                       |
| 23 |                               |     |                                                                                                                                                                                                                                                                                       |
| 24 |                               | 31c | Plans, if any, for granting public access to the full protocol, participant-level dataset, and statistical code                                                                                                                                                                       |
| 25 |                               |     |                                                                                                                                                                                                                                                                                       |
| 26 |                               |     |                                                                                                                                                                                                                                                                                       |
| 27 |                               |     |                                                                                                                                                                                                                                                                                       |
| 28 |                               |     |                                                                                                                                                                                                                                                                                       |
| 29 |                               |     |                                                                                                                                                                                                                                                                                       |
| 30 | <b>Appendices</b>             |     |                                                                                                                                                                                                                                                                                       |
| 31 | Informed consent materials    | 32  | Model consent form and other related documentation given to participants and authorized surrogates                                                                                                                                                                                    |
| 32 |                               |     |                                                                                                                                                                                                                                                                                       |
| 33 |                               |     |                                                                                                                                                                                                                                                                                       |
| 34 |                               |     |                                                                                                                                                                                                                                                                                       |
| 35 | Biological specimens          | 33  | Plans for collection, laboratory evaluation, and storage of biological specimens for genetic or molecular analysis in the current trial and for future use in ancillary studies, if applicable                                                                                        |
| 36 |                               |     |                                                                                                                                                                                                                                                                                       |
| 37 |                               |     |                                                                                                                                                                                                                                                                                       |
| 38 |                               |     |                                                                                                                                                                                                                                                                                       |
| 39 |                               |     |                                                                                                                                                                                                                                                                                       |
| 40 |                               |     |                                                                                                                                                                                                                                                                                       |
| 41 |                               |     |                                                                                                                                                                                                                                                                                       |
| 42 |                               |     |                                                                                                                                                                                                                                                                                       |
| 43 |                               |     |                                                                                                                                                                                                                                                                                       |
| 44 |                               |     |                                                                                                                                                                                                                                                                                       |
| 45 |                               |     |                                                                                                                                                                                                                                                                                       |
| 46 |                               |     |                                                                                                                                                                                                                                                                                       |
| 47 |                               |     |                                                                                                                                                                                                                                                                                       |
| 48 |                               |     |                                                                                                                                                                                                                                                                                       |
| 49 |                               |     |                                                                                                                                                                                                                                                                                       |
| 50 |                               |     |                                                                                                                                                                                                                                                                                       |
| 51 |                               |     |                                                                                                                                                                                                                                                                                       |
| 52 |                               |     |                                                                                                                                                                                                                                                                                       |
| 53 |                               |     |                                                                                                                                                                                                                                                                                       |
| 54 |                               |     |                                                                                                                                                                                                                                                                                       |
| 55 |                               |     |                                                                                                                                                                                                                                                                                       |
| 56 |                               |     |                                                                                                                                                                                                                                                                                       |
| 57 |                               |     |                                                                                                                                                                                                                                                                                       |
| 58 |                               |     |                                                                                                                                                                                                                                                                                       |
| 59 |                               |     |                                                                                                                                                                                                                                                                                       |
| 60 |                               |     |                                                                                                                                                                                                                                                                                       |

\*It is strongly recommended that this checklist be read in conjunction with the SPIRIT 2013 Explanation & Elaboration for important clarification on the items. Amendments to the protocol should be tracked and dated. The SPIRIT checklist is copyrighted by the SPIRIT Group under the Creative Commons "[Attribution-NonCommercial-NoDerivs 3.0 Unported](https://creativecommons.org/licenses/by-nc-nd/3.0/)" license.

## 2. Site Characteristics:

**Table S1**

|                                      | VUMC MICU          | LSU UMCNO MICU     | Ochsner MICU      | UW Harborview MICU  | UW Harborview NICU                  | UW Harborview TICU | Lahey MICU                  |
|--------------------------------------|--------------------|--------------------|-------------------|---------------------|-------------------------------------|--------------------|-----------------------------|
| <b>Number of Beds</b>                | 35                 | 20                 | 33                | 17                  | 30                                  | 24                 | 20                          |
| <b>Patient Notification Strategy</b> | Information Sheet  | Notification Sheet | Information Sheet | Information Sheet   | Information Sheet                   | Information Sheet  | Admission Information Sheet |
| <b>IRB Process</b>                   | Central*           | Central            | Central           | Central             | Central                             | Central            | Local                       |
|                                      | UAB MICU           | WFU MC MICU        | BSW Hospital MICU | OHSU MC MICU        | Hennepin MICU                       | UMMC MICU          |                             |
| <b>Number of Beds</b>                | 24                 | 42                 | 70                | 16                  | 28                                  | 20                 |                             |
| <b>Patient Notification Strategy</b> | Notification Sheet | Information Sheet  | Information Sheet | Notification Sheets | Notification and Information Sheets | Notification Sheet |                             |
| <b>IRB Oversight</b>                 | Central            | Central            | Local             | Central             | Central                             | Central            |                             |

VUMC is Vanderbilt University Medical Center in Nashville, TN; LSU is Louisiana State University Medical Center New Orleans, in New Orleans, LA; Ochsner is Ochsner Medical Center, in New Orleans, LA; UAB is University of Alabama at Birmingham in Birmingham, AL; UW is University of Washington Harborview Medical Center in Seattle, WA; Lahey is Lahey Hospital and Medical Center in Burlington, MA; WFU is Wake Forest University Medical Center in Winston-Salem, NC; BSW is Baylor, Scott & White Medical Center in Temple, TX; OHSU is Oregon Health Sciences University Medical Center in Portland, OR; Hennepin is Hennepin County Medical Center in Minneapolis, MN; UMMC is University of Mississippi Medical Center, in Jackson, MS; MICU is medical intensive care unit; NICU is neurological intensive care unit; TICU is trauma intensive care unit; IRB is institutional review board. "Notification sheet" is a patient and family notification packet provided to each patient and family following enrolment informing the patient of his or her enrolment and describing the study. "Information Sheet" is a patient and family information sheet containing general information about the study and contact information for the research team displayed in at least three publicly-visible locations within the study unit. "Admission Information Sheet" is a patient and family information sheet containing general study information and contact information for the research team provided to each patient and family on admission as part of a packet of materials provided at the time of admission to the study unit. \*The Vanderbilt IRB served as central IRB for sites utilizing a central IRB process.

### 3. Randomization Assignment Forms

A.

## NO Fluid Bolus

**Do NOT start a new fluid bolus PRIOR to induction (pushing meds)**

OK to continue any IV fluids already running or ordered

OK to give IV fluids for treatment of cardiovascular collapse  
(SBP < 65, new pressor requirement, or cardiac arrest)

B.

## Fluid Bolus

**1**

Obtain 500 ml of crystalloid  
& gravity IV tubing

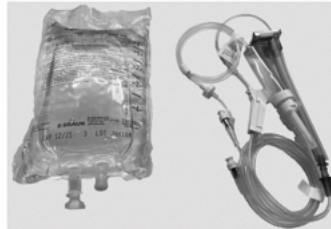

**2**

Hang fluid from top of IV pole,  
don't use IV pump

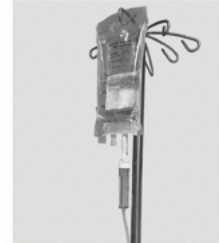

**3**

Start infusion to gravity ASAP  
Any IV or IO + squeeze fluid bag

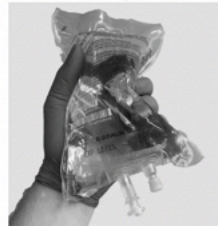

**4**

Begin procedure whenever ready  
(don't need to wait for fluid to finish)

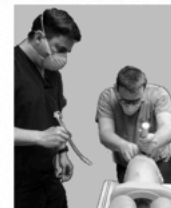

Complete 500 mL infusion

**Figure S1:** Facsimile of randomization assignment sheets use for subjects randomized to NO Fluid Bolus (A.), and Fluid Bolus (B.) groups. Personnel shown in this figure all consented to the reproduction of their image.

#### 4. Data Collection:

A trained, independent observer not involved in the performance of the procedure collects data for key peri-procedural outcomes including: whether the patient was already receiving an intravenous fluid infusion at the time of enrolment, whether a new fluid bolus was started between randomization and induction, the volume of new fluid bolus infused from randomization to induction, the administration of new or increased vasopressors prior to or with induction, systolic blood pressure and oxygen saturation at the time of induction, the lowest arterial oxygen saturation and systolic blood pressure from induction to two minutes after tracheal intubation, the administration of a new fluid bolus between induction and two minutes after tracheal intubation, the administration of a new or increased dose of any vasopressor between induction and two minutes after tracheal intubation, the total volume of new fluid bolus infused between induction and two minutes after tracheal intubation, and the number of attempts at tracheal intubation.

Immediately following the procedure, the operator records the following information: sedative choice and dose, subjective difficulty of intubation, modality of pre-oxygenation, modality of oxygenation and ventilation between induction and laryngoscopy, laryngoscopy device used for first attempt, whether video or direct laryngoscopy was used on the first attempt, Cormack-Lehane grade of glottic view on the first attempt<sup>1</sup>, difficult airway characteristics present (cervical spine immobilization collar, body fluid obscuring the operator's view of the glottis, or facial trauma), use of a bougie or endotracheal tube with stylet on the first attempt, use of rescue equipment (bougie, stylet, video laryngoscope, direct laryngoscope, laryngeal mask airway, bronchoscope, second proceduralist), and procedural complications (cardiac arrest, bradycardia, esophageal intubation, airway trauma, or witnessed aspiration). Operators also report their specialty and number of previous intubation procedures completed.

1  
2  
3 Study personnel also collect data on baseline characteristics, pre- and post-intubation  
4 management, and clinical outcomes from the medical record. The following information is  
5 collected from the medical record:  
6  
7  
8

9  
10 Baseline: Age, gender, height, weight, race, ethnicity, Acute Physiology and Chronic  
11 Health Evaluation (APACHE) II score<sup>2</sup>, active medical problems at the time of intubation, active  
12 and chronic comorbidities complicating intubation, indication for intubation, most recent pre-  
13 procedural Glasgow Coma Score<sup>3</sup>, non-invasive ventilator and high flow nasal cannula use in  
14 the hour prior to starting pre-oxygenation, vasopressor use in the hour preceding enrolment,  
15 presence of sepsis (defined as life-threatening organ dysfunction caused by a dysregulated host  
16 response to infection) or septic shock (defined as presence of sepsis plus vasopressor  
17 requirement to maintain a mean arterial pressure of 65mmHg or greater and serum lactate  
18 >2mmol/L in the absence of hypovolemia) at the time of enrolment, the highest fraction of  
19 inspired oxygen delivered (FiO<sub>2</sub>) in the hour preceding enrolment, and whether or not the  
20 intubation was a reintubation (defined as patient who had been extubated from invasive  
21 mechanical ventilation within the prior 72 hours).  
22  
23  
24  
25  
26  
27  
28  
29  
30  
31  
32  
33  
34  
35

36 Peri-procedural: type and dose of neuromuscular blocker; laryngoscope used, shape  
37 and size of the laryngoscope blade used for first attempt; total number of attempts; subjective  
38 assessment of the difficulty of tracheal intubation reported by the operator (easy, moderate,  
39 difficult, unknown);  
40  
41  
42  
43  
44

45 0-24 hours: Cardiac arrest within 1 hour of intubation; death within 1 hour of intubation;  
46 systolic blood pressure, oxygen saturation, FiO<sub>2</sub>, and positive end expiratory pressure delivered  
47 at 24 hours following intubation.  
48  
49  
50  
51  
52  
53  
54  
55  
56  
57



1  
2  
3 In-Hospital Outcomes: 28 day in-hospital mortality, days from enrolment to death,  
4 ventilator-free days, and ICU-free days – all censored at hospital discharge. See  
5 [Supplementary file 1, Items 5-8](#) below for definitions of these terms.  
6  
7  
8  
9

## 10 11 12 13 **5. Definition of 28-day in-hospital mortality**

14  
15  
16 28-day in-hospital mortality is defined as death from any cause between  
17 enrolment and either 28 days from enrolment or discharge from the hospital, whichever  
18 comes first.  
19  
20  
21  
22

## 23 **6. Definition of Ventilator Free Days**

24  
25  
26  
27 Ventilator-free days (VFDs) are defined as the number of days alive and free of  
28 invasive mechanical ventilation, from the patient's final extubation to 28 days after  
29 enrolment. If a patient returns to invasive mechanical ventilation and is subsequently  
30 liberated from invasive mechanical ventilation prior to day 28, the number of VFDs will  
31 be counted from the date of the final liberation from invasive mechanical ventilation  
32 before day 28. If the patient is receiving invasive mechanical ventilation at day 28 or  
33 dies prior to day 28, the number of VFDs will be counted as 0. If a patient is discharged  
34 while receiving assisted ventilation, the number of VFDs will be counted as 0. VFDs are  
35 counted as 0 in any patients who die before day 28. All data are censored at hospital  
36 discharge or 28 days, whichever occurs first (i.e., any liberation from invasive  
37 mechanical ventilation after a hospital discharge or after day 28 does not affect VFDs).  
38  
39  
40  
41  
42  
43  
44  
45  
46  
47  
48  
49  
50  
51  
52  
53  
54

## 55 **7. Definition of ICU-Free Days (ICUFDs)**

1  
2  
3  
4  
5  
6 ICU-FDs are defined as the number of days alive and not admitted to an ICU  
7  
8 service, from the patient's final discharge from the ICU service to 28 days after  
9  
10 enrolment. If a patient is not discharged from the ICU service by day 28, the number of  
11  
12 ICU-FDs will be counted as 0. If a patient is discharged but later admitted again to an  
13  
14 ICU service but then is subsequently discharged prior to day 28, ICU-FDs are counted  
15  
16 as the number of days from the date of the final ICU discharge to day 28. ICU-FDs are  
17  
18 counted as 0 in any patients who die before day 28. All data are censored at hospital  
19  
20 discharge or 28 days, whichever comes first (i.e., any readmission to an ICU service  
21  
22 after day 28 or after a hospital discharge does not affect VFDs).  
23  
24  
25  
26  
27  
28  
29

### 30 **8. Definition of “days from enrolment to in-hospital death”**

31  
32 For patients who die prior to hospital discharge, the number of days from  
33  
34 enrolment to in-hospital death will be calculated as the number of midnights crossed  
35  
36 from the day of enrolment until the day of death. For example, a patient who died on the  
37  
38 day of enrolment would have a value for days from extubation to death of "0".  
39  
40  
41  
42  
43

### 44 **9. Plan for communication of protocol changes**

45  
46 Any changes to the trial protocol (e.g., changes to eligibility criteria, outcomes,  
47  
48 analyses) will be reflected in a new version of the full trial protocol, tracked with the date  
49  
50 of the update and the version number of the trial protocol. A list summarizing the  
51  
52 changes made with each protocol revision will be included at the end of each protocol.  
53  
54 The updated protocol will be submitted to the relevant IRBs for tracking and approval  
55  
56  
57



1  
2  
3 prior to implementation of each protocol change. At the time of publication, the original  
4 trial protocol and the final trial protocol, including the summary of changes made with  
5 each protocol change, will be provided in the supplementary material for publication.  
6  
7  
8  
9  
10

## 11 12 13 **10. Patient Privacy and Data Storage**

14  
15  
16 At no time during the course of this study, its analysis, or its publication, will patient  
17 identities be revealed in any manner. The minimum necessary data containing patient  
18 or provider identities or other private healthcare information (PHI) is collected. All  
19 subjects are assigned a unique study ID number for tracking. Data collected from the  
20 medical record is entered into the secure online database REDCap. The PHI required to  
21 accurately collect clinical and outcomes data is available only to investigators at the site  
22 at which the subject is enrolled. All data available to the coordinating center and  
23 investigators at other sites are completely de-identified and contain no PHI. Hard copies  
24 of the data collection sheet completed at the time of the airway management event are  
25 stored in a locked room until. The de-identified dataset housed in REDCap will be  
26 accessed by the coordinating center for analyzing and reporting the results of this trial.  
27  
28 All data will be maintained in the secure online database REDCap until the time of study  
29 publication. After publication, all PHI at local centers will be expunged and only the de-  
30 identified version of the database will be retained. Potential future use of de-identified  
31 data generated in the course of this study by the coordinating center and other  
32 participating sites will be governed by mutual data use agreements.  
33  
34  
35  
36  
37  
38  
39  
40  
41  
42  
43  
44  
45  
46  
47  
48  
49  
50  
51  
52  
53  
54  
55  
56  
57  
58  
59  
60

## 11. References:

1. Cormack RS, Lehane J. Difficult tracheal intubation in obstetrics. *Anaesthesia* 1984;39(11):1105-11.
2. Knaus WA, Draper EA, Wagner DP, et al. APACHE II: a severity of disease classification system. *Crit Care Med* 1985;13(10):818-29.
3. Jennett B, Teasdale G, Braakman R, et al. Predicting outcome in individual patients after severe head injury. *Lancet* 1976;1(7968):1031-4.

For peer review only
